# Supplementary material for: Hygiene practices among young adolescents aged 12-15 years in low- and middle-income countries: a population-based study
Source: PubMed Central journal article supplement (PMC7719273; doi:10.7189/jogh.10.020436), 2020-12
Supplement: jogh-10-020436-s001.pdf [file jogh-10-020436-s001.pdf]

**Table S1 STROBE Statement—Checklist of items that should be included in reports of *cross-sectional studies***

|                           | <b>Item No.</b> | <b>Recommendation</b>                                                                                                                                                                | <b>Page No.</b> |
|---------------------------|-----------------|--------------------------------------------------------------------------------------------------------------------------------------------------------------------------------------|-----------------|
| <b>Title and abstract</b> | 1               | (a) Indicate the study’s design with a commonly used term in the title or the abstract                                                                                               | 3               |
|                           |                 | (b) Provide in the abstract an informative and balanced summary of what was done and what was found                                                                                  | 3               |
| <b>Introduction</b>       |                 |                                                                                                                                                                                      |                 |
| Background/rationale      | 2               | Explain the scientific background and rationale for the investigation being reported                                                                                                 | 4               |
| Objectives                | 3               | State specific objectives, including any prespecified hypotheses                                                                                                                     | 5               |
| <b>Methods</b>            |                 |                                                                                                                                                                                      |                 |
| Study design              | 4               | Present key elements of study design early in the paper                                                                                                                              | 5               |
| Setting                   | 5               | Describe the setting, locations, and relevant dates, including periods of recruitment, exposure, follow-up, and data collection                                                      | 5-6             |
| Participants              | 6               | (a) Give the eligibility criteria, and the sources and methods of selection of participants                                                                                          | 6               |
| Variables                 | 7               | Clearly define all outcomes, exposures, predictors, potential confounders, and effect modifiers. Give diagnostic criteria, if applicable                                             | 6-7             |
| Data sources/ measurement | 8*              | For each variable of interest, give sources of data and details of methods of assessment (measurement). Describe comparability of assessment methods if there is more than one group | 6-7             |
| Bias                      | 9               | Describe any efforts to address potential sources of bias                                                                                                                            | 13              |
| NA                        | 10              | Explain how the study size was arrived at                                                                                                                                            | 5-6             |
| Quantitative variables    | 11              | Explain how quantitative variables were handled in the analyses. If applicable, describe which groupings were chosen and why                                                         | 6-7             |
| Statistical methods       | 12              | (a) Describe all statistical methods, including those used to control for confounding                                                                                                | 7               |
|                           |                 | (b) Describe any methods used to examine subgroups and interactions                                                                                                                  | 7               |
|                           |                 | (c) Explain how missing data were addressed                                                                                                                                          | NA              |
|                           |                 | (d) If applicable, describe analytical methods taking account of sampling strategy                                                                                                   | 7               |
|                           |                 | (e) Describe any sensitivity analyses                                                                                                                                                | NA              |
| <b>Results</b>            |                 |                                                                                                                                                                                      |                 |
| Participants              | 13*             | (a) Report numbers of individuals at each stage of study—eg numbers potentially eligible, examined for eligibility, confirmed                                                        | 7               |

|                          |     |                                                                                                                                                                                                              |        |
|--------------------------|-----|--------------------------------------------------------------------------------------------------------------------------------------------------------------------------------------------------------------|--------|
|                          |     | eligible, included in the study, completing follow-up, and analysed                                                                                                                                          |        |
|                          |     | (b) Give reasons for non-participation at each stage                                                                                                                                                         | NA     |
|                          |     | (c) Consider use of a flow diagram                                                                                                                                                                           | Fig. 1 |
| Descriptive data         | 14* | (a) Give characteristics of study participants (eg demographic, clinical, social) and information on exposures and potential confounders                                                                     | 7-8    |
|                          |     | (b) Indicate number of participants with missing data for each variable of interest                                                                                                                          | NA     |
| Outcome data             | 15* | Report numbers of outcome events or summary measures                                                                                                                                                         | 8-9    |
| Main results             | 16  | (a) Give unadjusted estimates and, if applicable, confounder-adjusted estimates and their precision (eg, 95% confidence interval). Make clear which confounders were adjusted for and why they were included | 8-9    |
|                          |     | (b) Report category boundaries when continuous variables were categorized                                                                                                                                    | NA     |
|                          |     | (c) If relevant, consider translating estimates of relative risk into absolute risk for a meaningful time period                                                                                             | NA     |
| Other analyses           | 17  | Report other analyses done—eg analyses of subgroups and interactions, and sensitivity analyses                                                                                                               | 9      |
| <b>Discussion</b>        |     |                                                                                                                                                                                                              |        |
| Key results              | 18  | Summarise key results with reference to study objectives                                                                                                                                                     | 9-10   |
| Limitations              | 19  | Discuss limitations of the study, taking into account sources of potential bias or imprecision. Discuss both direction and magnitude of any potential bias                                                   | 13     |
| Interpretation           | 20  | Give a cautious overall interpretation of results considering objectives, limitations, multiplicity of analyses, results from similar studies, and other relevant evidence                                   | 10-12  |
| Generalisability         | 21  | Discuss the generalisability (external validity) of the study results                                                                                                                                        | 12-13  |
| <b>Other information</b> |     |                                                                                                                                                                                                              |        |
| Funding                  | 22  | Give the source of funding and the role of the funders for the present study and, if applicable, for the original study on which the present article is based                                                | 14     |

NA, not applicable.

\*Give information separately for exposed and unexposed groups.

**Note:** An Explanation and Elaboration article discusses each checklist item and gives methodological background and published examples of transparent reporting. The STROBE checklist is best used in conjunction with this article (freely available on the Web sites of PLoS Medicine at <http://www.plosmedicine.org/>, Annals of Internal Medicine at <http://www.annals.org/>, and Epidemiology at <http://www.epidem.com/>). Information on the STROBE Initiative is available at [www.strobe-statement.org](http://www.strobe-statement.org).



**Table S2 Prevalence of young adolescents who rarely or never wash hands before eating**

|                          | Total, % (95%CI)      | Boys, % (95%CI)       | Girls, % (95%CI)      | 12–13 years, % (95%CI) | 14–15 years, % (95%CI) |
|--------------------------|-----------------------|-----------------------|-----------------------|------------------------|------------------------|
| <b>Africa Region</b>     |                       |                       |                       |                        |                        |
| Algeria                  | 5.6 (4.8, 6.4)        | 7.1 (5.7, 8.5)        | 4.4 (3.5, 5.3)        | 4.9 (3.8, 6.0)         | 6.2 (5.1, 7.3)         |
| Botswana                 | 4.5 (3.0, 6.0)        | 7.1 (4.6, 9.5)        | 2.3 (0.8, 3.9)        | 3.3 (1.1, 5.4)         | 4.7 (3.0, 6.4)         |
| Ghana                    | 8.7 (7.3, 10.1)       | 7.9 (6.6, 9.3)        | 9.2 (7.4, 11.1)       | 8.7 (6.4, 10.9)        | 8.7 (7.2, 10.1)        |
| Kenya                    | 8.6 (6.7, 10.4)       | 9.9 (7.4, 12.4)       | 7.3 (5.5, 9.2)        | 10.5 (7.7, 13.3)       | 7.7 (5.4, 10.0)        |
| Mozambique               | 7.4 (4.1, 10.7)       | 5.9 (2.6, 9.2)        | 8.4 (4.4, 12.5)       | 12.5 (10.9, 14.0)      | 5.6 (2.6, 8.5)         |
| Namibia                  | 5.5 (4.3, 6.7)        | 5.4 (3.6, 7.3)        | 5.5 (4.0, 7.0)        | 4.4 (2.7, 6.0)         | 5.9 (4.3, 7.5)         |
| Senegal                  | 10.2 (2.3, 18.2)      | 9.7 (3.2, 16.1)       | 11.4 (0.6, 22.1)      | 10.8 (0.0, 22.4)       | 9.9 (4.0, 15.9)        |
| Swaziland                | 3.6 (1.9, 5.3)        | 3.5 (1.6, 5.4)        | 3.7 (1.8, 5.5)        | 3.0 (1.1, 4.8)         | 3.8 (1.9, 5.6)         |
| Tanzania                 | 7.3 (5.9, 8.6)        | 8.1 (6.1, 10.1)       | 6.3 (4.9, 7.7)        | 7.5 (5.4, 9.6)         | 7.1 (5.7, 8.5)         |
| Uganda                   | 6.3 (4.8, 7.9)        | 6.6 (4.2, 9.0)        | 6.2 (4.5, 7.9)        | 7.0 (4.5, 9.6)         | 6.2 (4.4, 7.9)         |
| Zambia                   | 12.5 (9.9, 15.1)      | 15.3 (11.4, 19.1)     | 9.7 (6.9, 12.5)       | 15.0 (12.7, 17.3)      | 11.2 (7.8, 14.6)       |
| Zimbabwe                 | 3.9 (3.0, 4.7)        | 4.0 (3.1, 5.0)        | 3.7 (2.5, 4.9)        | 4.7 (3.0, 6.3)         | 3.7 (2.7, 4.7)         |
| <b>Pooled estimates</b>  | <b>6.6 (5.4, 7.8)</b> | <b>7.2 (5.7, 8.6)</b> | <b>5.9 (4.7, 7.1)</b> | <b>7.5 (5.2, 9.7)</b>  | <b>6.4 (5.2, 7.5)</b>  |
| <b>I<sup>2</sup> (%)</b> | <b>87.4</b>           | <b>84.7</b>           | <b>83.2</b>           | <b>93.3</b>            | <b>80.5</b>            |
| <b>European Region</b>   |                       |                       |                       |                        |                        |
| Macedonia                | 2.1 (1.3, 2.9)        | 1.9 (0.4, 3.3)        | 2.4 (0.7, 4.1)        | 2.5 (1.7, 3.3)         | 1.8 (0.7, 3.0)         |
| <b>Pooled estimates</b>  | –                     | –                     | –                     | –                      | –                      |
| <b>I<sup>2</sup> (%)</b> | –                     | –                     | –                     | –                      | –                      |
| <b>America Region</b>    |                       |                       |                       |                        |                        |
| Argentina                | 11.2 (10.0, 12.4)     | 11.4 (9.8, 13.0)      | 11.1 (9.9, 12.2)      | 8.2 (7.0, 9.3)         | 12.6 (11.1, 14.2)      |
| Bahamas                  | 15.6 (13.2, 18.0)     | 15.3 (12.9, 17.6)     | 16.0 (12.2, 19.8)     | 15.8 (13.6, 18.1)      | 15.4 (11.7, 19.0)      |
| Barbados                 | 14.3 (11.6, 16.9)     | 12.0 (8.7, 15.3)      | 16.5 (13.3, 19.7)     | 12.5 (9.5, 15.4)       | 14.9 (11.8, 18.0)      |
| Belize                   | 3.7 (3.0, 4.4)        | 3.3 (2.1, 4.6)        | 3.9 (3.0, 4.7)        | 3.0 (1.6, 4.4)         | 4.3 (3.4, 5.1)         |
| Bolivia                  | 10.8 (9.2, 12.3)      | 11.4 (9.7, 13.0)      | 10.3 (8.1, 12.5)      | 10.3 (8.1, 12.5)       | 11.0 (9.0, 12.9)       |
| Cayman                   | 11.2 (9.3, 13.1)      | 10.0 (7.3, 12.6)      | 12.5 (9.7, 15.4)      | 8.2 (5.8, 10.5)        | 13.4 (10.6, 16.1)      |
| Costa Rica               | 9.6 (8.1, 11.1)       | 9.5 (8.0, 11.0)       | 9.6 (7.5, 11.7)       | 8.7 (5.7, 11.7)        | 10.1 (8.3, 11.9)       |
| Curaçao                  | 12.2 (10.1, 14.2)     | 10.4 (7.6, 13.2)      | 13.8 (10.8, 16.8)     | 12.2 (8.6, 15.8)       | 12.1 (9.9, 14.3)       |
| Ecuador                  | 12.3 (10.4, 14.2)     | 12.5 (10.9, 14.1)     | 11.3 (9.7, 13)        | 11.4 (9.3, 13.6)       | 13.3 (11, 15.7)        |
| El Salvador              | 5.3 (3.9, 6.7)        | 4.8 (2.8, 6.7)        | 5.5 (4.3, 6.7)        | 3.6 (1.9, 5.2)         | 6.1 (4.5, 7.7)         |
| Grenada                  | 11.4 (9.3, 13.5)      | 10.4 (7.5, 13.3)      | 12.2 (9.5, 15.0)      | 10.5 (8.4, 12.5)       | 12.1 (9.1, 15.1)       |
| Guatemala                | 4.5 (2.4, 6.6)        | 4.5 (2.5, 6.4)        | 4.2 (2.2, 6.1)        | 3.6 (1.4, 5.8)         | 5.0 (2.6, 7.3)         |
| Guyana                   | 9.2 (7.0, 11.3)       | 8.7 (5.7, 11.7)       | 9.6 (7.2, 12.0)       | 8.5 (4.4, 12.7)        | 9.4 (7.2, 11.6)        |
| Honduras                 | 7.5 (6.3, 8.7)        | 7.0 (4.8, 9.3)        | 7.7 (5.7, 9.7)        | 7.2 (5.8, 8.6)         | 7.7 (6.2, 9.2)         |
| Peru                     | 4.9 (3.7, 6.1)        | 4.9 (3.3, 6.6)        | 4.9 (3.3, 6.5)        | 4.7 (2.6, 6.8)         | 5.0 (3.8, 6.2)         |
| Saint Kitts and Nevis    | 11.7 (10.0, 13.5)     | 11.5 (8.9, 14.2)      | 11.9 (9.6, 14.2)      | 9.7 (6.6, 12.7)        | 12.3 (10.3, 14.4)      |
| Saint Lucia              | 16.5 (13.7, 19.2)     | 14.8 (11.2, 18.4)     | 17.8 (13.6, 22.0)     | 13.4 (10.1, 16.6)      | 18.6 (15.6, 21.6)      |

|                                     |                         |                         |                         |                         |                         |
|-------------------------------------|-------------------------|-------------------------|-------------------------|-------------------------|-------------------------|
| Saint Vincent and the Grenadines    | 8.7 (6.4, 11.1)         | 8.5 (5.7, 11.4)         | 8.4 (5.4, 11.5)         | 9.4 (5.3, 13.6)         | 8.0 (5.8, 10.2)         |
| Trinidad and Tobago                 | 11.3 (9.6, 13.0)        | 12.1 (9.2, 15.0)        | 10.3 (7.5, 13.1)        | 8.6 (6.0, 11.3)         | 13.5 (11.4, 15.6)       |
| Uruguay                             | 12.5 (10.6, 14.5)       | 12.7 (10.4, 14.9)       | 12.5 (10.3, 14.8)       | 9.6 (6.8, 12.4)         | 13.6 (11.6, 15.6)       |
| Venezuela                           | 6.4 (5.3, 7.5)          | 6.5 (4.8, 8.2)          | 6.3 (5.1, 7.5)          | 5.8 (4.8, 6.9)          | 7.3 (5.3, 9.3)          |
| <b>Pooled estimates</b>             | <b>10.0 (8.3, 11.6)</b> | <b>9.5 (7.9, 11.1)</b>  | <b>10.1 (8.5, 11.7)</b> | <b>8.7 (7.2, 10.1)</b>  | <b>10.6 (8.9, 12.4)</b> |
| <b>I<sup>2</sup> (%)</b>            | <b>95.6</b>             | <b>91.9</b>             | <b>93.8</b>             | <b>90.4</b>             | <b>94.5</b>             |
| <b>Eastern Mediterranean Region</b> |                         |                         |                         |                         |                         |
| Afghanistan                         | 6.0 (4.0, 8.0)          | 6.4 (3.7, 9.0)          | 4.8 (2.4, 7.1)          | 8.6 (4.2, 13.0)         | 5.1 (3.2, 6.9)          |
| Djibouti                            | 6.0 (4.4, 7.6)          | 4.5 (2.6, 6.4)          | 8.1 (4.8, 11.4)         | 5.4 (2.3, 8.5)          | 6.1 (4.2, 7.9)          |
| Egypt                               | 12.9 (10.1, 15.6)       | 13.5 (9.2, 17.8)        | 12.2 (9.5, 14.9)        | 12.3 (9.6, 15.0)        | 13.5 (9.0, 18.0)        |
| Iraq                                | 7.3 (5.3, 9.4)          | 7.6 (5.0, 10.2)         | 7.1 (4.2, 9.9)          | 6.4 (3.8, 8.9)          | 7.9 (5.6, 10.2)         |
| Jordan                              | 6.8 (5.2, 8.3)          | 8.5 (7.0, 10.0)         | 5.1 (3.5, 6.8)          | 4.3 (0.8, 7.8)          | 7.1 (5.6, 8.6)          |
| Kuwait                              | 10.7 (8.8, 12.7)        | 10.1 (7.1, 13.2)        | 11.0 (8.7, 13.2)        | 11.5 (7.9, 15.1)        | 10.4 (8.1, 12.8)        |
| Lebanon                             | 5.8 (4.9, 6.6)          | 6.6 (4.9, 8.3)          | 5.0 (3.9, 6.1)          | 3.5 (1.8, 5.3)          | 7.4 (5.9, 8.8)          |
| Libya                               | 8.1 (6.0, 10.2)         | 10.6 (7.6, 13.6)        | 5.6 (3.8, 7.4)          | 7.0 (4.9, 9.0)          | 9.2 (6.2, 12.2)         |
| Morocco                             | 3.4 (2.2, 4.6)          | 3.7 (2.5, 4.8)          | 3.1 (1.6, 4.6)          | 3.0 (2.0, 4.1)          | 3.7 (2.2, 5.2)          |
| Oman                                | 7.9 (5.7, 10.0)         | 10.4 (8.3, 12.4)        | 5.5 (3.0, 8.0)          | 7.5 (2.6, 12.4)         | 8.0 (6.3, 9.6)          |
| Pakistan                            | 3.4 (2.6, 4.3)          | 4.5 (3.6, 5.4)          | 1.9 (1.6, 2.1)          | 2.9 (1.1, 4.8)          | 3.6 (2.8, 4.4)          |
| Qatar                               | 17.0 (13.4, 20.6)       | 19.5 (14.3, 24.6)       | 14.4 (9.2, 19.5)        | 14.1 (11.5, 16.6)       | 20.3 (13.2, 27.3)       |
| Sudan                               | 7.5 (5.8, 9.3)          | 8.7 (7.2, 10.3)         | 6.4 (3.4, 9.3)          | 5.9 (0.0, 12.0)         | 8.1 (6.1, 10.1)         |
| Syrian Arab Republic                | 9.2 (7.2, 11.2)         | 10.5 (8.3, 12.7)        | 7.9 (6.2, 9.6)          | 9.3 (6.5, 12.1)         | 9.2 (7.0, 11.3)         |
| Tunisia                             | 6.0 (5.1, 6.9)          | 6.7 (5.2, 8.2)          | 5.2 (4.0, 6.4)          | 4.9 (3.8, 5.9)          | 6.9 (5.3, 8.5)          |
| United Arab Emirates                | 8.4 (6.8, 10.1)         | 9.5 (6.6, 12.4)         | 7.5 (6.2, 8.9)          | 8.9 (6.1, 11.6)         | 8.2 (6.5, 10.0)         |
| UNRWA                               | 6.9 (5.6, 8.1)          | 8.5 (7.4, 9.7)          | 5.1 (4.0, 6.2)          | 6.7 (4.6, 8.8)          | 6.9 (5.9, 8.0)          |
| Yemen                               | 8.3 (4.7, 11.9)         | 9.0 (4.1, 13.9)         | 7.0 (1.2, 12.8)         | 7.7 (2.4, 13.1)         | 8.7 (4.2, 13.2)         |
| <b>Pooled estimates</b>             | <b>7.6 (6.4, 8.7)</b>   | <b>8.3 (7.0, 9.7)</b>   | <b>6.6 (5.1, 8.1)</b>   | <b>7.1 (5.6, 8.6)</b>   | <b>7.6 (6.5, 8.8)</b>   |
| <b>I<sup>2</sup> (%)</b>            | <b>89.9</b>             | <b>88.5</b>             | <b>95.1</b>             | <b>87.4</b>             | <b>86.3</b>             |
| <b>Southeast Asia Region</b>        |                         |                         |                         |                         |                         |
| Bangladesh                          | 3.1 (1.4, 4.8)          | 3.0 (0.3, 5.8)          | 3.2 (1.8, 4.7)          | 5.5 (3.5, 7.4)          | 2.1 (1.0, 3.1)          |
| India                               | 5.9 (4.8, 7.0)          | 6.6 (5.4, 7.9)          | 5.0 (3.7, 6.2)          | 6.0 (4.3, 7.7)          | 5.9 (4.6, 7.1)          |
| Indonesia                           | 2.5 (2.0, 3.0)          | 3.2 (2.4, 4.0)          | 1.8 (1.2, 2.3)          | 2.6 (2.0, 3.2)          | 2.3 (1.7, 3.0)          |
| Thailand                            | 14.9 (12.2, 17.6)       | 14.4 (12.0, 16.7)       | 15.5 (11.7, 19.3)       | 14.3 (11.8, 16.8)       | 15.4 (11.7, 19.1)       |
| Timor-Leste                         | 20.9 (18.6, 23.2)       | 24.3 (21.2, 27.4)       | 17.2 (14.1, 20.3)       | 24.5 (20.6, 28.4)       | 19.7 (17.3, 22.1)       |
| <b>Pooled estimates</b>             | <b>9.3 (4.2, 14.5)</b>  | <b>10.2 (4.6, 15.8)</b> | <b>8.1 (4.2, 12.0)</b>  | <b>10.3 (4.9, 15.7)</b> | <b>8.8 (4.3, 13.3)</b>  |
| <b>I<sup>2</sup> (%)</b>            | <b>98.7</b>             | <b>98.3</b>             | <b>97.3</b>             | <b>98.0</b>             | <b>98.4</b>             |
| <b>Western Pacific Region</b>       |                         |                         |                         |                         |                         |

|                          |                        |                         |                       |                        |                        |
|--------------------------|------------------------|-------------------------|-----------------------|------------------------|------------------------|
| Brunei Darussalam        | 3.5 (2.6, 4.4)         | 3.7 (2.5, 5.0)          | 3.3 (2.3, 4.4)        | 4.7 (2.3, 7.2)         | 3.0 (2.2, 3.7)         |
| Cambodia                 | 2.1 (1.3, 2.9)         | 2.1 (1.1, 3.2)          | 2.0 (1.3, 2.7)        | 2.2 (1.0, 3.4)         | 2.1 (1.1, 3.1)         |
| China                    | 4.9 (4.2, 5.6)         | 5.7 (4.7, 6.7)          | 4.0 (3.2, 4.8)        | 5.4 (4.4, 6.5)         | 4.5 (3.6, 5.3)         |
| Cook                     | 7.4 (3.7, 11.1)        | 8.4 (2.1, 14.7)         | 6.1 (2.0, 10.3)       | 9.8 (1.3, 18.2)        | 6.9 (3.7, 10.1)        |
| Kiribati                 | 20.6 (15.7, 25.5)      | 24.9 (18.2, 31.5)       | 16.9 (12.6, 21.3)     | 15.4 (10.3, 20.4)      | 22.7 (17.1, 28.4)      |
| Laos                     | 1.9 (0.8, 3.0)         | 2.0 (0.5, 3.4)          | 1.8 (0.8, 2.8)        | 0.4 (0.0, 1.4)         | 2.0 (0.8, 3.3)         |
| Malaysia                 | 5.0 (4.4, 5.6)         | 6.1 (5.4, 6.8)          | 3.9 (3.1, 4.7)        | 4.9 (3.9, 5.9)         | 5.0 (4.4, 5.6)         |
| Mongolia                 | 6.9 (5.8, 8.0)         | 7.4 (6.2, 8.6)          | 6.3 (4.6, 8.0)        | 6.7 (5.6, 7.8)         | 7.1 (5.3, 8.8)         |
| Nauru                    | 8.5 (5.5, 11.6)        | 13.0 (7.6, 18.4)        | 4.4 (1.3, 7.5)        | 4.9 (1.4, 8.4)         | 11.7 (7.0, 16.5)       |
| Philippines              | 7.7 (4.2, 11.2)        | 7.7 (4.6, 10.8)         | 7.6 (3.3, 12.0)       | 6.6 (2.6, 10.5)        | 8.3 (3.6, 13.0)        |
| Samoa                    | 14.6 (12.7, 16.4)      | 17.9 (15.8, 20.0)       | 11.1 (8.8, 13.4)      | 16.6 (13.0, 20.2)      | 13.9 (11.8, 15.9)      |
| Solomon                  | 8.6 (7.0, 10.3)        | 9.8 (6.3, 13.4)         | 6.4 (4.0, 8.9)        | 5.2 (2.1, 8.3)         | 9.9 (7.3, 12.4)        |
| Tokelau                  | 17.0 (8.7, 25.3)       | 14.2 (3.7, 24.8)        | 21.8 (7.2, 36.3)      | 17.3 (5.3, 29.2)       | 16.6 (4.7, 28.6)       |
| Tonga                    | 11.4 (9.5, 13.3)       | 11.8 (8.7, 14.9)        | 10.8 (9.0, 12.6)      | 12.8 (9.2, 16.4)       | 10.9 (8.9, 12.8)       |
| Tuvalu                   | 38.7 (35.0, 42.4)      | 45.2 (39.7, 50.7)       | 32.6 (27.6, 37.7)     | 35.5 (30.6, 40.3)      | 42.9 (37.1, 48.7)      |
| Vanuatu                  | 5.7 (4.4, 6.9)         | 6.8 (4.2, 9.4)          | 4.6 (3.2, 6.1)        | 5.9 (2.9, 8.9)         | 5.4 (3.7, 7.1)         |
| Vietnam                  | 7.0 (5.1, 8.9)         | 6.6 (4.9, 8.3)          | 7.4 (4.6, 10.2)       | –                      | 6.9 (5.1, 8.7)         |
| Wallis and Futuna        | 12.2 (9.6, 14.8)       | 12.4 (9.0, 15.8)        | 11.8 (8.7, 14.9)      | 12.1 (7.1, 17.1)       | 12.2 (9.1, 15.4)       |
| <b>Pooled estimates</b>  | <b>9.6 (7.6, 11.6)</b> | <b>10.5 (8.3, 12.8)</b> | <b>7.8 (6.1, 9.5)</b> | <b>9.0 (6.7, 11.3)</b> | <b>9.4 (7.5, 11.3)</b> |
| <b>I<sup>2</sup> (%)</b> | <b>97.5</b>            | <b>96.6</b>             | <b>95.1</b>           | <b>96.2</b>            | <b>96.2</b>            |
| <b>Total</b>             |                        |                         |                       |                        |                        |
| <b>Pooled estimates</b>  | <b>7.4 (4.4, 10.3)</b> | <b>7.7 (5.0, 10.5)</b>  | <b>6.7 (4.6, 8.8)</b> | <b>7.3 (4.4, 10.2)</b> | <b>7.3 (4.6, 10.1)</b> |
| <b>I<sup>2</sup> (%)</b> | <b>96.2</b>            | <b>93.0</b>             | <b>89.0</b>           | <b>94.4</b>            | <b>94.9</b>            |

**Table S3 Prevalence of young adolescents who rarely or never wash hands after using the toilet or latrine**

|                          | Total, % (95%CI)       | Boys, % (95%CI)        | Girls, % (95%CI)       | 12–13 years, % (95%CI) | 14–15 years, % (95%CI) |
|--------------------------|------------------------|------------------------|------------------------|------------------------|------------------------|
| <b>Africa Region</b>     |                        |                        |                        |                        |                        |
| Algeria                  | 3.1 (2.4, 3.8)         | 3.4 (2.4, 4.4)         | 2.6 (1.8, 3.5)         | 2.9 (1.4, 4.3)         | 3.3 (2.3, 4.4)         |
| Botswana                 | 5.1 (4.1, 6.2)         | 6.9 (5.4, 8.4)         | 3.7 (2.1, 5.3)         | 3.8 (1.6, 6.1)         | 5.4 (4.1, 6.6)         |
| Ghana                    | 11.8 (10.1, 13.5)      | 12.4 (10.2, 14.5)      | 11.2 (9.0, 13.4)       | 12.5 (9.7, 15.3)       | 11.5 (10.0, 12.9)      |
| Kenya                    | 13.9 (11.7, 16.1)      | 15.5 (12.7, 18.3)      | 15.5 (12.7, 18.3)      | 15.3 (12.5, 18.1)      | 13.3 (10.7, 15.8)      |
| Mozambique               | 7.8 (4.0, 11.6)        | 6.7 (5.2, 8.1)         | 8.4 (3.4, 13.5)        | 11.3 (2.6, 19.9)       | 6.6 (3.2, 10.0)        |
| Namibia                  | 6.4 (4.9, 7.9)         | 8.4 (6.4, 10.4)        | 4.9 (3.2, 6.5)         | 7.6 (5.5, 9.6)         | 5.9 (4.0, 7.9)         |
| Senegal                  | 10.0 (2.2, 17.8)       | 9.4 (2.1, 16.7)        | 11.0 (1.1, 21.0)       | 11.5 (0.0, 23.2)       | 9.1 (3.4, 14.8)        |
| Swaziland                | 2.8 (2.2, 3.5)         | 3.4 (2.1, 4.7)         | 2.5 (1.8, 3.3)         | 2.1 (1.1, 3.0)         | 3.1 (2.3, 3.9)         |
| Tanzania                 | 17.3 (13.9, 20.7)      | 17.6 (13.3, 22.0)      | 16.7 (13.1, 20.4)      | 17.4 (13.1, 21.6)      | 17.3 (14.0, 20.6)      |
| Uganda                   | 7.9 (5.6, 10.3)        | 8.4 (5.2, 11.6)        | 7.2 (4.4, 10.0)        | 6.2 (3.8, 8.6)         | 8.3 (5.8, 10.9)        |
| Zambia                   | 15.4 (12.6, 18.2)      | 16.3 (11.8, 20.7)      | 13.6 (10.4, 16.7)      | 17.4 (14.7, 20.0)      | 14.4 (11.1, 17.7)      |
| Zimbabwe                 | 6.2 (4.9, 7.5)         | 7.6 (5.8, 9.5)         | 4.8 (3.5, 6.1)         | 5.8 (4.2, 7.3)         | 6.3 (4.9, 7.7)         |
| <b>Pooled estimates</b>  | <b>8.7 (6.5, 10.9)</b> | <b>9.3 (7.0, 11.6)</b> | <b>8.1 (5.8, 10.3)</b> | <b>9.1 (6.1, 12.2)</b> | <b>8.5 (6.2, 10.8)</b> |
| <b>I<sup>2</sup> (%)</b> | <b>96.5</b>            | <b>93.8</b>            | <b>95.1</b>            | <b>95.6</b>            | <b>95.4</b>            |
| <b>European Region</b>   |                        |                        |                        |                        |                        |
| Macedonia                | 1.8 (0.9, 2.8)         | 1.8 (0.9, 2.8)         | 2.2 (0.8, 3.6)         | 2.2 (0.8, 3.6)         | 2.1 (1.1, 3.0)         |
| <b>Pooled estimates</b>  | –                      | –                      | –                      | –                      | –                      |
| <b>I<sup>2</sup> (%)</b> | –                      | –                      | –                      | –                      | –                      |
| <b>America Region</b>    |                        |                        |                        |                        |                        |
| Argentina                | 5.9 (4.9, 6.9)         | 7.1 (5.5, 8.6)         | 4.7 (3.8, 5.7)         | 4.5 (3.4, 5.7)         | 6.5 (5.4, 7.6)         |
| Bahamas                  | 4.5 (3.2, 5.7)         | 4.2 (2.3, 6.1)         | 4.8 (3.5, 6.1)         | 3.5 (2.1, 5.0)         | 5.5 (3.2, 7.8)         |
| Barbados                 | 1.7 (1.1, 2.4)         | 2.0 (1.0, 2.9)         | 1.5 (0.6, 2.3)         | 0.7 (0.0, 1.4)         | 2.1 (1.3, 2.9)         |
| Belize                   | 1.6 (1.1, 2.2)         | 2.6 (1.5, 3.7)         | 0.7 (0.0, 1.5)         | 1.1 (0.3, 1.8)         | 2.1 (1.2, 3.0)         |
| Bolivia                  | 7.3 (5.9, 8.6)         | 7.5 (5.4, 9.5)         | 7.0 (5.5, 8.5)         | 9.8 (7.7, 12.0)        | 6.3 (4.9, 7.7)         |
| Cayman                   | 4.7 (3.4, 6.0)         | 5.3 (3.3, 7.3)         | 4.0 (2.4, 5.7)         | 4.3 (2.5, 6.2)         | 4.9 (3.2, 6.7)         |
| Costa Rica               | 2.2 (1.5, 2.8)         | 2.5 (1.4, 3.5)         | 1.9 (1.1, 2.6)         | 1.9 (0.7, 3.0)         | 2.3 (1.5, 3.1)         |
| Curaçao                  | 3.6 (2.6, 4.5)         | 4.1 (2.6, 5.6)         | 3.0 (1.9, 4.2)         | 2.7 (1.4, 3.9)         | 4.0 (2.8, 5.1)         |
| Ecuador                  | 6.5 (5.1, 8.0)         | 7.0 (5.9, 8.0)         | 5.3 (3.9, 6.7)         | 6.4 (4.9, 8.0)         | 6.6 (4.0, 9.3)         |
| El Salvador              | 4.0 (2.3, 5.8)         | 4.2 (1.6, 6.9)         | 3.3 (1.8, 4.8)         | 3.1 (1.1, 5.1)         | 4.4 (2.6, 6.3)         |
| Grenada                  | 3.5 (2.7, 4.3)         | 4.3 (2.9, 5.8)         | 2.9 (1.8, 4.1)         | 3.6 (1.9, 5.2)         | 3.5 (2.4, 4.5)         |
| Guatemala                | 2.7 (1.1, 4.2)         | 3.1 (1.3, 4.8)         | 2.0 (1.1, 2.9)         | 3.3 (1.9, 4.7)         | 2.4 (0.5, 4.3)         |
| Guyana                   | 6.4 (4.4, 8.3)         | 6.9 (4.5, 9.3)         | 5.6 (3.3, 7.8)         | 6.6 (3.1, 10.1)        | 6.2 (4.4, 8.1)         |
| Honduras                 | 5.2 (3.7, 6.7)         | 4.6 (2.5, 6.6)         | 5.6 (3.5, 7.6)         | 6.1 (4.0, 8.2)         | 6.1 (4.0, 8.2)         |
| Peru                     | 6.6 (5.4, 7.8)         | 6.4 (4.6, 8.2)         | 6.8 (5.2, 8.3)         | 6.8 (4.5, 9.2)         | 6.5 (5.2, 7.8)         |
| Saint Kitts and Nevis    | 2.9 (2.0, 3.9)         | 4.3 (2.6, 6.0)         | 1.6 (0.7, 2.4)         | 1.9 (0.5, 3.3)         | 3.2 (2.1, 4.4)         |
| Saint Lucia              | 4.4 (3.2, 5.5)         | 5.1 (3.0, 7.3)         | 3.7 (2.4, 5.1)         | 4.3 (2.8, 5.8)         | 4.4 (2.7, 6.1)         |

|                                     |                        |                        |                       |                        |                        |
|-------------------------------------|------------------------|------------------------|-----------------------|------------------------|------------------------|
| Saint Vincent and the Grenadines    | 4.1 (2.8, 5.4)         | 3.9 (2.1, 5.8)         | 3.7 (1.8, 5.5)        | 3.6 (2.1, 5.1)         | 4.6 (2.9, 6.4)         |
| Trinidad and Tobago                 | 2.7 (1.9, 3.5)         | 2.8 (2.0, 3.6)         | 2.4 (1.4, 3.5)        | 1.6 (0.6, 2.6)         | 3.6 (2.1, 5.1)         |
| Uruguay                             | 7.6 (5.8, 9.3)         | 7.6 (5.8, 9.3)         | 6.3 (4.6, 8.0)        | 5.6 (3.9, 7.3)         | 7.3 (5.7, 9.0)         |
| Venezuela                           | 3.1 (2.6, 3.7)         | 3.9 (2.8, 4.9)         | 2.4 (1.5, 3.3)        | 3.2 (2.5, 3.8)         | 3.1 (2.1, 4.0)         |
| <b>Pooled estimates</b>             | <b>4.2 (3.5, 5.0)</b>  | <b>4.7 (3.8, 5.5)</b>  | <b>3.7 (2.9, 4.4)</b> | <b>3.8 (3.0, 4.7)</b>  | <b>4.4 (3.7, 5.2)</b>  |
| <b>I<sup>2</sup> (%)</b>            | <b>91.5</b>            | <b>84.6</b>            | <b>89.1</b>           | <b>88.9</b>            | <b>85.7</b>            |
| <b>Eastern Mediterranean Region</b> |                        |                        |                       |                        |                        |
| Afghanistan                         | 5.6 (3.0, 8.2)         | 5.8 (2.3, 9.2)         | 4.6 (1.2, 8.0)        | 8.6 (2.6, 14.6)        | 4.5 (2.1, 7.0)         |
| Djibouti                            | 12.9 (11.3, 14.6)      | 13.5 (11.4, 15.7)      | 11.8 (8.9, 14.7)      | 15.3 (11.1, 19.5)      | 12.5 (10.7, 14.2)      |
| Egypt                               | 9.3 (6.4, 12.3)        | 11.3 (6.4, 16.2)       | 7.5 (4.3, 10.6)       | 9.4 (6.6, 12.3)        | 9.2 (4.7, 13.8)        |
| Iraq                                | 8.1 (6.0, 10.2)        | 9.9 (7.3, 12.5)        | 6.0 (4.0, 8.1)        | 8.2 (4.8, 11.6)        | 8.1 (5.5, 10.7)        |
| Jordan                              | 7.0 (4.4, 9.6)         | 8.8 (7.0, 10.6)        | 5.2 (2.9, 7.5)        | 7.8 (2.3, 13.2)        | 6.9 (4.4, 9.4)         |
| Kuwait                              | 6.2 (4.5, 7.9)         | 7.6 (5.2, 9.9)         | 4.8 (3.2, 6.4)        | 5.4 (2.8, 8.1)         | 6.5 (4.6, 8.5)         |
| Lebanon                             | 2.4 (1.1, 3.6)         | 3.1 (1.0, 5.2)         | 1.7 (0.7, 2.7)        | 1.9 (0.6, 3.1)         | 2.7 (0.9, 4.5)         |
| Libya                               | 6.8 (5.2, 8.4)         | 8.6 (6.1, 11.0)        | 5.1 (3.5, 6.6)        | 6.8 (5.3, 8.2)         | 6.8 (4.6, 9.1)         |
| Morocco                             | 5.3 (4.5, 6.1)         | 5.6 (3.7, 7.5)         | 5.6 (3.7, 7.5)        | 5.6 (3.7, 7.5)         | 5.6 (3.7, 7.5)         |
| Oman                                | 8.8 (6.9, 10.7)        | 8.8 (6.9, 10.7)        | 8.8 (6.9, 10.7)       | 8.8 (6.9, 10.7)        | 8.8 (6.9, 10.7)        |
| Pakistan                            | 3.3 (2.3, 4.3)         | 3.3 (2.3, 4.3)         | 3.3 (2.3, 4.3)        | 3.3 (2.3, 4.3)         | 3.3 (2.3, 4.3)         |
| Qatar                               | 4.0 (3.1, 4.9)         | 4.5 (3.3, 5.7)         | 3.6 (2.5, 4.7)        | 3.5 (2.3, 4.7)         | 4.4 (2.9, 5.9)         |
| Sudan                               | 11.9 (9.8, 14.1)       | 11.9 (9.8, 14.1)       | 11.9 (9.8, 14.1)      | 11.9 (9.8, 14.1)       | 11.9 (9.8, 14.1)       |
| Syrian Arab Republic                | 3.8 (2.1, 5.5)         | 4.2 (2.9, 5.4)         | 3.4 (1.3, 5.5)        | 4.5 (2.3, 6.7)         | 3.2 (1.7, 4.7)         |
| Tunisia                             | 4.0 (3.1, 4.9)         | 4.5 (3.3, 5.7)         | 3.6 (2.5, 4.7)        | 3.5 (2.3, 4.7)         | 4.4 (2.9, 5.9)         |
| United Arab Emirates                | 3.4 (2.4, 4.4)         | 4.3 (3.2, 5.5)         | 2.8 (2.0, 3.6)        | 3.3 (1.9, 4.7)         | 3.5 (2.4, 4.5)         |
| UNRWA                               | 4.8 (3.9, 5.7)         | 6.7 (5.6, 7.7)         | 3.0 (2.4, 3.6)        | 5.5 (4.2, 6.8)         | 4.4 (3.6, 5.2)         |
| Yemen                               | 14.7 (11.4, 17.9)      | 15.0 (10.8, 19.2)      | 12.6 (6.6, 18.6)      | 14.1 (7.1, 21.0)       | 15.1 (11.0, 19.1)      |
| <b>Pooled estimates</b>             | <b>6.6 (5.3, 7.8)</b>  | <b>7.3 (6.0, 8.7)</b>  | <b>5.4 (4.3, 6.4)</b> | <b>6.4 (5.1, 7.8)</b>  | <b>6.5 (5.2, 7.9)</b>  |
| <b>I<sup>2</sup> (%)</b>            | <b>93.3</b>            | <b>91.3</b>            | <b>89.9</b>           | <b>89.3</b>            | <b>91.4</b>            |
| <b>Southeast Asia Region</b>        |                        |                        |                       |                        |                        |
| Bangladesh                          | 1.9 (0.2, 3.6)         | 2.2 (0.0, 5.0)         | 1.5 (0.4, 2.7)        | 3.7 (2.3, 5.1)         | 1.2 (0.7, 1.7)         |
| India                               | 3.3 (2.6, 4.0)         | 3.3 (2.4, 4.1)         | 3.4 (2.5, 4.2)        | 3.5 (2.4, 4.5)         | 3.2 (2.5, 4.0)         |
| Indonesia                           | 2.3 (1.8, 2.8)         | 3.2 (2.3, 4.2)         | 1.4 (1.0, 1.8)        | 2.3 (1.7, 3.0)         | 2.2 (1.7, 2.8)         |
| Thailand                            | 6.5 (5.2, 7.8)         | 8.2 (5.9, 10.5)        | 4.8 (2.9, 6.8)        | 7.4 (5.6, 9.3)         | 5.8 (4.4, 7.2)         |
| Timor-Leste                         | 27.5 (24.1, 30.9)      | 29.8 (25.7, 34.0)      | 24.9 (20.1, 29.8)     | 30.3 (24.7, 35.9)      | 26.6 (23.5, 29.7)      |
| <b>Pooled estimates</b>             | <b>7.7 (4.3, 11.1)</b> | <b>8.8 (4.4, 13.2)</b> | <b>5.5 (3.0, 8.0)</b> | <b>7.7 (4.5, 10.9)</b> | <b>7.1 (4.1, 10.1)</b> |
| <b>I<sup>2</sup> (%)</b>            | <b>98.3</b>            | <b>97.6</b>            | <b>96.5</b>           | <b>96.6</b>            | <b>98.6</b>            |
| <b>Western Pacific Region</b>       |                        |                        |                       |                        |                        |



|                          |                       |                        |                       |                       |                       |
|--------------------------|-----------------------|------------------------|-----------------------|-----------------------|-----------------------|
| Brunei Darussalam        | 2.9 (1.7, 4.1)        | 3.6 (1.6, 5.5)         | 2.2 (1.2, 3.2)        | 3.6 (0.8, 6.4)        | 2.6 (1.6, 3.6)        |
| Cambodia                 | 3.0 (2.0, 4.1)        | 3.6 (2.2, 5.0)         | 2.5 (1.3, 3.7)        | 2.3 (0.3, 4.3)        | 3.3 (2.1, 4.5)        |
| China                    | 3.0 (2.4, 3.5)        | 3.7 (3.0, 4.4)         | 2.2 (1.7, 2.8)        | 3.0 (2.4, 3.6)        | 3.0 (2.3, 3.7)        |
| Cook                     | 4.3 (1.6, 7.0)        | 5.8 (0.6, 11.1)        | 2.5 (0.7, 4.2)        | 6.1 (0.4, 11.8)       | 3.9 (1.5, 6.4)        |
| Kiribati                 | 16.1 (12.7, 19.4)     | 19.6 (15.0, 24.1)      | 13.0 (10.1, 16.0)     | 14.1 (9.8, 18.3)      | 16.9 (13.1, 20.6)     |
| Laos                     | 3.8 (2.1, 5.6)        | 4.3 (2.2, 6.4)         | 3.4 (1.4, 5.4)        | 3.6 (0.0, 8.1)        | 3.9 (2.1, 5.6)        |
| Malaysia                 | 6.0 (5.3, 6.7)        | 7.1 (6.1, 8.0)         | 4.9 (4.1, 5.6)        | 6.5 (5.4, 7.6)        | 5.7 (4.9, 6.5)        |
| Mongolia                 | 10.5 (8.8, 12.2)      | 11.8 (9.6, 14.0)       | 9.1 (7.2, 11.0)       | 10.1 (8.1, 12.1)      | 10.8 (8.5, 13.1)      |
| Nauru                    | 8.1 (5.1, 11.1)       | 12.6 (7.2, 18.0)       | 3.3 (0.9, 5.8)        | 6.9 (2.7, 11.1)       | 9.2 (5.0, 13.4)       |
| Philippines              | 6.3 (3.3, 9.3)        | 7.0 (4.3, 9.6)         | 5.6 (2.1, 9.2)        | 4.3 (1.4, 7.2)        | 7.4 (3.4, 11.5)       |
| Samoa                    | 17.1 (14.6, 19.6)     | 18.8 (15.8, 21.8)      | 14.8 (11.5, 18.2)     | 18.1 (13.6, 22.6)     | 16.7 (14.0, 19.4)     |
| Solomon                  | 8.9 (6.5, 11.4)       | 9.5 (6.5, 12.5)        | 8.5 (5.8, 11.2)       | 5.7 (2.9, 8.5)        | 10.1 (6.9, 13.4)      |
| Tokelau                  | 5.4 (0.8, 10.0)       | 5.5 (0.0, 11.9)        | 5.7 (0.0, 12.8)       | 4.3 (0.0, 9.9)        | 6.7 (0.0, 14.6)       |
| Tonga                    | 6.7 (5.3, 8.1)        | 6.7 (4.6, 8.7)         | 6.7 (5.0, 8.4)        | 6.4 (3.7, 9.0)        | 6.8 (5.2, 8.4)        |
| Tuvalu                   | 17.9 (14.9, 20.9)     | 25.2 (20.3, 30.0)      | 10.7 (7.3, 14.1)      | 17.2 (13.3, 21.0)     | 18.9 (14.2, 23.6)     |
| Vanuatu                  | 6.8 (4.1, 9.5)        | 8.5 (3.8, 13.3)        | 5.2 (2.8, 7.5)        | 8.3 (4.8, 11.7)       | 5.2 (2.6, 7.8)        |
| Vietnam                  | 2.2 (1.5, 2.9)        | 2.8 (1.6, 4.0)         | 1.6 (0.8, 2.5)        | 6.4 (0.0, 19.7)       | 2.1 (1.4, 2.8)        |
| Wallis and Futuna        | 7.9 (5.8, 10.0)       | 7.9 (4.6, 11.3)        | 7.8 (5.0, 10.6)       | 10.1 (6.0, 14.1)      | 6.5 (4.3, 8.6)        |
| <b>Pooled estimates</b>  | <b>7.4 (5.8, 9.0)</b> | <b>8.7 (6.8, 10.7)</b> | <b>5.8 (4.4, 7.1)</b> | <b>7.4 (5.6, 9.3)</b> | <b>7.3 (5.7, 8.9)</b> |
| <b>I<sup>2</sup> (%)</b> | <b>95.9</b>           | <b>94.2</b>            | <b>92.9</b>           | <b>90.7</b>           | <b>94.4</b>           |
| <b>Total</b>             |                       |                        |                       |                       |                       |
| <b>Pooled estimates</b>  | <b>5.9 (3.8, 7.9)</b> | <b>6.5 (4.1, 9.0)</b>  | <b>5.0 (3.6, 6.3)</b> | <b>5.8 (3.9, 7.7)</b> | <b>5.8 (3.9, 7.7)</b> |
| <b>I<sup>2</sup> (%)</b> | <b>93.1</b>           | <b>94.1</b>            | <b>84.1</b>           | <b>88.2</b>           | <b>91.5</b>           |

**Table S4 Prevalence of young adolescents who rarely or never wash hands using soap**

|                          | Total, % (95%CI)         | Boys, % (95%CI)          | Girls, % (95%CI)        | 12–13 years, % (95%CI)   | 14–15 years, % (95%CI)   |
|--------------------------|--------------------------|--------------------------|-------------------------|--------------------------|--------------------------|
| <b>Africa Region</b>     |                          |                          |                         |                          |                          |
| Algeria                  | 5.1 (4.3, 5.8)           | 6.1 (4.9, 7.3)           | 4.1 (3, 5.2)            | 4.8 (3.6, 6.1)           | 5.3 (4.2, 6.4)           |
| Botswana                 | 17.0 (13.3, 20.8)        | 17.9 (13.7, 22.2)        | 16.1 (12, 20.2)         | 17.6 (11.3, 23.9)        | 16.9 (13.1, 20.7)        |
| Ghana                    | 13.5 (11.7, 15.4)        | 13.8 (11.9, 15.8)        | 13.1 (10.7, 15.4)       | 12.7 (10.4, 15.1)        | 13.9 (12, 15.9)          |
| Kenya                    | 16.6 (13.8, 19.5)        | 17.5 (14.8, 20.1)        | 15.8 (11.6, 20)         | 16.8 (14, 19.5)          | 16.6 (13.2, 19.9)        |
| Mozambique               | 12.0 (5.7, 18.3)         | 7.7 (5.1, 10.4)          | 15.9 (5.6, 26.3)        | 16.6 (3.3, 30.0)         | 10.3 (4.1, 16.4)         |
| Namibia                  | 10.8 (8.5, 13.0)         | 12.7 (9.6, 15.7)         | 9.0 (6.9, 11.1)         | 9.6 (6.3, 12.8)          | 11.3 (8.6, 13.9)         |
| Senegal                  | 14.7 (7.6, 21.8)         | 13.7 (7.4, 20.0)         | 16.2 (7.0, 25.4)        | 16.1 (5.1, 27.0)         | 13.9 (8.9, 18.9)         |
| Swaziland                | 11.6 (9.7, 13.5)         | 13.5 (10.9, 16.2)        | 10.4 (8.5, 12.3)        | 11.2 (7.4, 15.0)         | 11.8 (10.0, 13.6)        |
| Tanzania                 | 20.5 (17.7, 23.3)        | 22.1 (18.4, 25.9)        | 18.8 (15.3, 22.2)       | 20.2 (16.4, 23.9)        | 20.8 (18.0, 23.5)        |
| Uganda                   | 14.7 (11.8, 17.5)        | 14.7 (10.6, 18.7)        | 14.6 (11.3, 17.9)       | 14.4 (11.2, 17.5)        | 14.7 (11.7, 17.7)        |
| Zambia                   | 20.6 (17.7, 23.4)        | 19.0 (15.7, 22.3)        | 21.7 (18.2, 25.2)       | 22.6 (16.9, 28.3)        | 19.5 (16.4, 22.6)        |
| Zimbabwe                 | 6.2 (4.9, 7.5)           | 7.6 (5.8, 9.5)           | 4.8 (3.5, 6.1)          | 5.8 (4.2, 7.3)           | 6.3 (4.9, 7.7)           |
| <b>Pooled estimates</b>  | <b>13.5 (10.2, 16.8)</b> | <b>13.7 (10.6, 16.8)</b> | <b>13.0 (9.7, 16.3)</b> | <b>13.5 (10.0, 17.0)</b> | <b>13.4 (10.2, 16.6)</b> |
| <b>I<sup>2</sup> (%)</b> | <b>96.8</b>              | <b>94.2</b>              | <b>95.5</b>             | <b>93.9</b>              | <b>95.6</b>              |
| <b>European Region</b>   |                          |                          |                         |                          |                          |
| Macedonia                | 3.8 (2.4, 5.2)           | 4.2 (2.0, 6.4)           | 3.3 (1.6, 5.1)          | 3.5 (1.3, 5.7)           | 3.9 (2.4, 5.4)           |
| <b>Pooled estimates</b>  | –                        | –                        | –                       | –                        | –                        |
| <b>I<sup>2</sup> (%)</b> | –                        | –                        | –                       | –                        | –                        |
| <b>America Region</b>    |                          |                          |                         |                          |                          |
| Argentina                | 6.2 (5.4, 7.1)           | 8.5 (6.9, 10.1)          | 4.1 (3.6, 4.7)          | 4.3 (3.3, 5.3)           | 7.2 (6.2, 8.1)           |
| Bahamas                  | 8.5 (6.9, 10.2)          | 8.9 (6.0, 11.8)          | 8.2 (6.5, 10.0)         | 8.6 (6.6, 10.6)          | 8.5 (5.9, 11.0)          |
| Barbados                 | 7.8 (6.1, 9.5)           | 4.2 (2.0, 6.4)           | 3.3 (1.6, 5.1)          | 3.5 (1.3, 5.7)           | 3.9 (2.4, 5.4)           |
| Belize                   | 4.5 (3.3, 5.7)           | 4.5 (2.4, 6.6)           | 4.6 (2.5, 6.6)          | 4.3 (2.6, 5.9)           | 4.8 (3.5, 6.0)           |
| Bolivia                  | 16.0 (13.6, 18.4)        | 18.3 (15.3, 21.3)        | 13.7 (11.2, 16.2)       | 14.8 (11.3, 18.3)        | 16.5 (14.1, 18.9)        |
| Cayman                   | 4.7 (3.4, 6.0)           | 5.3 (3.3, 7.3)           | 4.0 (2.4, 5.7)          | 4.3 (2.5, 6.2)           | 4.9 (3.2, 6.7)           |
| Costa Rica               | 5.4 (4.3, 6.5)           | 5.7 (3.5, 7.9)           | 5.1 (4.0, 6.3)          | 4.5 (2.5, 6.5)           | 5.9 (4.7, 7.0)           |
| Curaçao                  | 6.4 (4.8, 8.0)           | 6.7 (4.6, 8.9)           | 6.2 (4.1, 8.2)          | 7.0 (4.5, 9.5)           | 6.1 (4.6, 7.6)           |
| Ecuador                  | 9.5 (8, 11)              | 9.7 (8.9, 10.6)          | 8.5 (7.3, 9.7)          | 9.1 (8, 10.1)            | 10.1 (7.4, 12.7)         |
| El Salvador              | 5.6 (4.1, 7.1)           | 5.4 (3.2, 7.6)           | 5.2 (3.3, 7.1)          | 4.8 (2.3, 7.3)           | 5.9 (4.2, 7.6)           |
| Grenada                  | 10.2 (8.2, 12.2)         | 9.3 (6.1, 12.5)          | 10.9 (8.4, 13.4)        | 9.8 (6.8, 12.9)          | 10.5 (8.2, 12.8)         |
| Guatemala                | 5.6 (3.9, 7.3)           | 6.8 (4.8, 8.8)           | 4.5 (2.1, 6.8)          | 6.8 (4.6, 8.9)           | 5.0 (2.9, 7.1)           |
| Guyana                   | 10.7 (8.1, 13.2)         | 11.7 (7.8, 15.7)         | 9.6 (6.9, 12.3)         | 9.0 (5.8, 12.1)          | 11.3 (8.5, 14.1)         |
| Honduras                 | 58.7 (54.6, 62.7)        | 56.0 (51.6, 60.4)        | 60.9 (56.0, 65.7)       | 53.7 (47.4, 59.9)        | 63.2 (58.1, 68.3)        |
| Peru                     | 7.5 (5.8, 9.2)           | 8.7 (6.5, 10.8)          | 6.4 (4.4, 8.5)          | 8.8 (5.5, 12.1)          | 7.1 (5.5, 8.6)           |
| Saint Kitts and Nevis    | 2.9 (2.0, 3.9)           | 4.3 (2.6, 6.0)           | 1.6 (0.7, 2.4)          | 1.9 (0.5, 3.3)           | 3.2 (2.1, 4.4)           |
| Saint Lucia              | 11.1 (8.9, 13.3)         | 13.0 (9.0, 16.9)         | 9.6 (7.0, 12.2)         | 8.6 (5.7, 11.6)          | 12.8 (10.2, 15.4)        |

|                                     |                         |                         |                        |                         |                         |
|-------------------------------------|-------------------------|-------------------------|------------------------|-------------------------|-------------------------|
| Saint Vincent and the Grenadines    | 8.4 (6.4, 10.3)         | 8.0 (4.8, 11.3)         | 8.7 (6.3, 11.2)        | 9.7 (6.4, 12.9)         | 7.0 (5.0, 8.9)          |
| Trinidad and Tobago                 | 10.0 (8.9, 11.0)        | 11.1 (8.8, 13.3)        | 8.7 (6.3, 11.1)        | 7.6 (5.1, 10.1)         | 11.9 (9.9, 13.9)        |
| Uruguay                             | 3.6 (2.5, 4.7)          | 4.5 (3.0, 6.0)          | 2.8 (1.6, 4.0)         | 7.6 (5.1, 10.1)         | 11.9 (9.9, 13.9)        |
| Venezuela                           | 3.1 (2.6, 3.7)          | 3.9 (2.8, 4.9)          | 2.4 (1.5, 3.3)         | 3.2 (2.5, 3.8)          | 3.1 (2.1, 4.0)          |
| <b>Pooled estimates</b>             | <b>9.5 (7.4, 11.5)</b>  | <b>9.9 (7.5, 12.4)</b>  | <b>8.5 (6.5, 10.5)</b> | <b>8.3 (6.5, 10.1)</b>  | <b>10.0 (7.8, 12.2)</b> |
| <b>I<sup>2</sup> (%)</b>            | <b>98.1</b>             | <b>97.0</b>             | <b>97.5</b>            | <b>95.4</b>             | <b>97.4</b>             |
| <b>Eastern Mediterranean Region</b> |                         |                         |                        |                         |                         |
| Afghanistan                         | 11.3 (6.7, 15.9)        | 15.0 (9.1, 21.0)        | 7.2 (5.9, 8.5)         | 9.7 (5.6, 13.8)         | 11.9 (6.0, 17.8)        |
| Djibouti                            | 11.8 (9.1, 14.5)        | 11.9 (7.8, 16.0)        | 11.8 (9.1, 14.5)       | 9.2 (6.1, 12.4)         | 12.3 (9.4, 15.2)        |
| Egypt                               | 7.7 (5.0, 10.3)         | 10.3 (5.9, 14.7)        | 5.1 (3.3, 6.9)         | 7.7 (5.5, 10.0)         | 7.6 (3.5, 11.6)         |
| Iraq                                | 3.9 (2.7, 5.2)          | 4.0 (2.5, 5.5)          | 3.9 (2.8, 4.9)         | 3.6 (1.7, 5.5)          | 4.1 (2.8, 5.4)          |
| Jordan                              | 8.8 (6.6, 10.9)         | 10.7 (8.8, 12.7)        | 6.9 (4.3, 9.5)         | 12.3 (5.1, 19.4)        | 8.3 (6.5, 10.0)         |
| Kuwait                              | 6.9 (4.7, 9.1)          | 7.9 (4.8, 11.0)         | 5.6 (4.4, 6.7)         | 4.9 (2.5, 7.3)          | 7.7 (5.0, 10.4)         |
| Lebanon                             | 1.8 (1.1, 2.5)          | 2.8 (1.2, 4.3)          | 0.9 (0.2, 1.6)         | 2.2 (0.9, 3.4)          | 1.4 (0.7, 2.1)          |
| Libya                               | 7.2 (5.7, 8.8)          | 9.4 (7.0, 11.8)         | 5.2 (3.4, 7.0)         | 7.3 (5.1, 9.5)          | 7.2 (5.4, 9.1)          |
| Morocco                             | 7.4 (5.9, 8.9)          | 8.8 (6.6, 11.0)         | 5.8 (4.5, 7.1)         | 7.3 (5.4, 9.3)          | 7.5 (5.8, 9.1)          |
| Oman                                | 7.3 (5.3, 9.4)          | 9.2 (6.3, 12.1)         | 5.2 (3.7, 6.8)         | 6.8 (3.7, 9.9)          | 7.5 (5.6, 9.4)          |
| Pakistan                            | 8.1 (6.0, 10.1)         | 10.9 (8.3, 13.5)        | 3.6 (3.0, 4.2)         | 8.4 (5.9, 10.9)         | 8.0 (5.7, 10.3)         |
| Qatar                               | 15.8 (12.1, 19.5)       | 19.1 (14.3, 24.0)       | 12.9 (6.8, 18.9)       | 14.4 (11.3, 17.5)       | 17.4 (10.3, 24.5)       |
| Sudan                               | 19.9 (15.2, 24.7)       | 21.9 (17.7, 26.1)       | 17.8 (11.0, 24.6)      | 18.6 (8.7, 28.6)        | 20.3 (15.9, 24.7)       |
| Syrian Arab Republic                | 6.6 (4.7, 8.5)          | 8.5 (6.9, 10.2)         | 4.6 (3.1, 6.1)         | 6.7 (4.6, 8.7)          | 6.5 (4.2, 8.9)          |
| Tunisia                             | 4.7 (3.5, 5.9)          | 5.7 (4, 7.4)            | 3.7 (2.5, 4.9)         | 4.4 (2.7, 6)            | 5.0 (3.7, 6.2)          |
| United Arab Emirates                | 4.2 (3.0, 5.4)          | 5.4 (4.0, 6.8)          | 3.3 (2.1, 4.5)         | 4.0 (2.8, 5.2)          | 4.2 (2.8, 5.6)          |
| UNRWA                               | 4.8 (3.9, 5.7)          | 6.7 (5.6, 7.7)          | 3.0 (2.4, 3.6)         | 5.5 (4.2, 6.8)          | 4.4 (3.6, 5.2)          |
| Yemen                               | 21.6 (16.2, 26.9)       | 24.7 (19.3, 30.1)       | 15.5 (5.8, 25.2)       | 17.6 (8.3, 26.9)        | 24.1 (17.3, 30.9)       |
| <b>Pooled estimates</b>             | <b>8.2 (6.6, 9.7)</b>   | <b>10.0 (8.2, 11.9)</b> | <b>5.4 (4.3, 6.4)</b>  | <b>7.1 (5.7, 8.5)</b>   | <b>8.1 (6.5, 9.8)</b>   |
| <b>I<sup>2</sup> (%)</b>            | <b>93.9</b>             | <b>92.0</b>             | <b>91.4</b>            | <b>84.9</b>             | <b>93.7</b>             |
| <b>Southeast Asia Region</b>        |                         |                         |                        |                         |                         |
| Bangladesh                          | 5.0 (2.1, 7.9)          | 6.2 (1.4, 11.0)         | 3.0 (0.9, 5.0)         | 4.7 (3.0, 6.4)          | 5.1 (1.4, 8.9)          |
| India                               | 12.9 (11.2, 14.6)       | 13.5 (11.7, 15.4)       | 12.0 (9.8, 14.2)       | 12.2 (9.9, 14.6)        | 13.3 (11.2, 15.4)       |
| Indonesia                           | 3.9 (3.2, 4.7)          | 5.7 (4.6, 6.7)          | 2.2 (1.6, 2.8)         | 3.9 (3.2, 4.6)          | 3.9 (3.0, 4.8)          |
| Thailand                            | 14.2 (11.8, 16.7)       | 16.2 (12.8, 19.6)       | 12.4 (10.0, 14.7)      | 13.1 (10.5, 15.8)       | 15.1 (12.5, 17.7)       |
| Timor-Leste                         | 19.1 (16.6, 21.6)       | 22.3 (18.0, 26.6)       | 15.6 (12.7, 18.4)      | 21.2 (16.2, 26.2)       | 18.4 (15.8, 21.0)       |
| <b>Pooled estimates</b>             | <b>11.0 (4.9, 17.1)</b> | <b>12.7 (6.9, 18.5)</b> | <b>9.0 (3.4, 14.5)</b> | <b>10.6 (6.0, 15.2)</b> | <b>11.2 (4.7, 17.6)</b> |
| <b>I<sup>2</sup> (%)</b>            | <b>98.3</b>             | <b>96.5</b>             | <b>98.0</b>            | <b>96.7</b>             | <b>97.9</b>             |
| <b>Western Pacific Region</b>       |                         |                         |                        |                         |                         |

|                          |                        |                         |                        |                        |                        |
|--------------------------|------------------------|-------------------------|------------------------|------------------------|------------------------|
| Brunei Darussalam        | 9.7 (8.0, 11.4)        | 11.7 (8.6, 14.7)        | 7.9 (6.1, 9.6)         | 10.1 (7.2, 13.0)       | 9.6 (7.6, 11.5)        |
| Cambodia                 | 2.9 (2.1, 3.6)         | 3.4 (1.9, 4.9)          | 2.3 (0.8, 3.8)         | 2.6 (0.8, 4.5)         | 3.0 (2.2, 3.7)         |
| China                    | 3.0 (2.4, 3.5)         | 3.7 (3.0, 4.4)          | 2.2 (1.7, 2.8)         | 3.0 (2.4, 3.6)         | 3.0 (2.3, 3.7)         |
| Cook                     | 7.9 (4.7, 11.0)        | 10.3 (6.0, 14.6)        | 5.7 (1.6, 9.8)         | 7.1 (0.0, 14.4)        | 8.1 (4.5, 11.7)        |
| Kiribati                 | 15.3 (12.8, 17.8)      | 18.0 (14.5, 21.5)       | 13.0 (9.8, 16.3)       | 14.0 (10.2, 17.9)      | 15.9 (13.4, 18.3)      |
| Laos                     | 8.5 (6.3, 10.7)        | 8.2 (5.6, 10.9)         | 8.6 (5.8, 11.5)        | 9.6 (3.1, 16.0)        | 8.4 (6.3, 10.4)        |
| Malaysia                 | 13.6 (12.6, 14.6)      | 16.1 (14.8, 17.4)       | 11.2 (10.1, 12.3)      | 13.7 (12.4, 15.1)      | 13.7 (12.4, 15.1)      |
| Mongolia                 | 3.0 (2.3, 3.8)         | 3.6 (2.6, 4.5)          | 2.5 (1.7, 3.3)         | 3.0 (1.8, 4.1)         | 3.1 (2.1, 4.0)         |
| Nauru                    | 8.1 (5.1, 11.1)        | 12.6 (7.2, 18.0)        | 3.3 (0.9, 5.8)         | 6.9 (2.7, 11.1)        | 9.2 (5.0, 13.4)        |
| Philippines              | 7.9 (4.8, 11.0)        | 8.4 (5.6, 11.1)         | 7.5 (3.4, 11.5)        | 6.8 (2.7, 10.9)        | 8.5 (4.6, 12.4)        |
| Samoa                    | 19.3 (16.8, 21.8)      | 22.1 (17.6, 26.5)       | 16.2 (12.8, 19.6)      | 22.0 (17.5, 26.6)      | 18.4 (16.1, 20.7)      |
| Solomon                  | 10.1 (6.0, 14.3)       | 11.4 (6.3, 16.5)        | 8.8 (4.1, 13.5)        | 8.8 (4.6, 12.9)        | 10.6 (6.2, 15.1)       |
| Tokelau                  | 5.4 (0.8, 10.0)        | 5.5 (0.0, 11.9)         | 5.7 (0.0, 12.8)        | 4.3 (0.0, 9.9)         | 6.7 (0.0, 14.6)        |
| Tonga                    | 17.6 (15.6, 19.6)      | 16.3 (13.7, 18.8)       | 18.9 (15.9, 21.8)      | 21.1 (17.3, 24.9)      | 16.2 (13.7, 18.7)      |
| Tuvalu                   | 17.9 (14.9, 20.9)      | 25.2 (20.3, 30.0)       | 10.7 (7.3, 14.1)       | 17.2 (13.3, 21.0)      | 18.9 (14.2, 23.6)      |
| Vanuatu                  | 14.6 (10.2, 18.9)      | 17.5 (13.1, 21.9)       | 12.1 (7.1, 17.1)       | 13.6 (7.1, 20.2)       | 15.6 (10.4, 20.8)      |
| Vietnam                  | 2.2 (1.5, 2.9)         | 2.8 (1.6, 4.0)          | 1.6 (0.8, 2.5)         | 6.4 (0.0, 19.7)        | 2.1 (1.4, 2.8)         |
| Wallis and Futuna        | 8.2 (6.2, 10.2)        | 9.1 (5.5, 12.7)         | 7.2 (4.0, 10.3)        | 8.7 (6.1, 11.3)        | 7.8 (5.1, 10.5)        |
| <b>Pooled estimates</b>  | <b>9.7 (7.3, 12.0)</b> | <b>11.2 (8.5, 14.0)</b> | <b>7.9 (5.8, 10.0)</b> | <b>9.9 (7.1, 12.7)</b> | <b>9.8 (7.4, 12.1)</b> |
| <b>I<sup>2</sup> (%)</b> | <b>98.2</b>            | <b>97.2</b>             | <b>96.6</b>            | <b>96.1</b>            | <b>97.5</b>            |
| <b>Total</b>             |                        |                         |                        |                        |                        |
| <b>Pooled estimates</b>  | <b>9.0 (6.2, 11.8)</b> | <b>10.0 (7.2, 12.8)</b> | <b>7.5 (5.2, 9.8)</b>  | <b>8.5 (6.1, 10.8)</b> | <b>9.1 (6.3, 12.0)</b> |
| <b>I<sup>2</sup> (%)</b> | <b>89.7</b>            | <b>84.5</b>             | <b>86.7</b>            | <b>83.1</b>            | <b>89.0</b>            |

**Table S5 Prevalence of daily tooth brushing among young adolescents**

|                         | Total, % (95%CI)     |                      |                      | Boys, % (95%CI)      |                      |                      | Girls, % (95%CI)     |                      |                      | 12–13 years, % (95%CI) |                      |                      | 14–15 years, % (95%CI) |                      |                      |
|-------------------------|----------------------|----------------------|----------------------|----------------------|----------------------|----------------------|----------------------|----------------------|----------------------|------------------------|----------------------|----------------------|------------------------|----------------------|----------------------|
|                         | 0                    | 1–3 times            | >3 times             | 0                    | 1–3 times            | >3 times             | 0                    | 1–3 times            | >3 times             | 0                      | 1–3 times            | >3 times             | 0                      | 1–3 times            | >3 times             |
| <b>Africa Region</b>    |                      |                      |                      |                      |                      |                      |                      |                      |                      |                        |                      |                      |                        |                      |                      |
| Algeria                 | 19.7<br>(17.1, 22.3) | 67.1<br>(64.5, 69.8) | 13.2<br>(11.2, 15.1) | 23.4<br>(20.3, 26.5) | 63.4<br>(59.9, 66.8) | 13.2<br>(10.3, 16.2) | 16.7<br>(13.8, 19.5) | 70.5<br>(67.5, 73.5) | 12.8<br>(11.1, 14.6) | 18.4<br>(15.2, 21.6)   | 68.0<br>(64.6, 71.4) | 13.6<br>(10.7, 16.5) | 20.8<br>(17.7, 23.9)   | 66.4<br>(63.6, 69.3) | 12.8<br>(11.1, 14.5) |
| Botswana                | 5.0 (3.4, 6.6)       | 83.8<br>(80.7, 87.0) | 11.2 (8.6, 13.8)     | 7.2 (5.2, 9.2)       | 81.2<br>(77.2, 85.2) | 11.6 (7.8, 15.3)     | 2.9 (1.0, 4.8)       | 86.2<br>(82.3, 90.2) | 10.8 (7.7, 14.0)     | 2.7 (0.1, 5.3)         | 83.9<br>(76.1, 91.8) | 13.3 (6.6, 20.1)     | 5.4 (3.6, 7.2)         | 83.8<br>(80.9, 86.7) | 10.8 (8.3, 13.4)     |
| Ghana                   | 13.3<br>(11.3, 15.4) | 62.7<br>(59.6, 65.9) | 24.0<br>(21.8, 26.1) | 13.3<br>(11.0, 15.7) | 62.7<br>(59.3, 66.1) | 24.0<br>(21.6, 26.4) | 12.9<br>(10.6, 15.1) | 63.1<br>(59.1, 67.1) | 24.0<br>(21.1, 26.9) | 12.4 (9.5, 15.3)       | 59.8<br>(55.2, 64.4) | 27.8<br>(23.8, 31.8) | 13.8 (11.6, 15.9)      | 64.2<br>(61.1, 67.4) | 22.0<br>(20.2, 23.8) |
| Kenya                   | –                    | –                    | –                    | –                    | –                    | –                    | –                    | –                    | –                    | –                      | –                    | –                    | –                      | –                    | –                    |
| Mozambique              | 5.7 (3, 8.4)         | 74.6<br>(65.9, 83.4) | 19.7<br>(12.5, 26.9) | 6.2 (2.0, 10.5)      | 74.7<br>(65.8, 83.6) | 19.1<br>(11.5, 26.7) | 5.5 (2.1, 8.9)       | 73.8<br>(63.5, 84.2) | 20.7<br>(11.8, 29.5) | 8.1 (3.1, 13.1)        | 64.0<br>(50.0, 78.0) | 27.9<br>(15.8, 40.0) | 4.8 (2.4, 7.2)         | 78.5<br>(72.1, 85.0) | 16.7<br>(11.7, 21.7) |
| Namibia                 | 12.7 (9.9, 15.6)     | 67.2<br>(62.9, 71.6) | 20.0<br>(16.4, 23.7) | 13.4<br>(10.2, 16.6) | 67.7<br>(63.1, 72.2) | 18.9<br>(15.0, 22.9) | 12.0 (9.0, 14.9)     | 67.3<br>(62.5, 72.1) | 20.7<br>(16.6, 24.8) | 14.3 (9.1, 19.6)       | 63.6<br>(57.0, 70.3) | 22.0<br>(16.7, 27.3) | 12.1 (9.7, 14.5)       | 68.7<br>(63.9, 73.4) | 19.2<br>(15.5, 23.0) |
| Senegal                 | 14.6<br>(11.0, 18.2) | 75.4<br>(70.8, 80.0) | 10.1 (7.4, 12.7)     | 13.6 (9.8, 17.4)     | 76.8<br>(71.9, 81.7) | 9.6 (7.2, 12.0)      | 15.5<br>(11.1, 19.9) | 74.1<br>(69.4, 78.7) | 10.4 (7.1, 13.8)     | 14.4 (9.8, 18.9)       | 73.9<br>(68.4, 79.4) | 11.7 (6.8, 16.6)     | 14.7<br>(10.8, 18.6)   | 76.2<br>(71.5, 81.0) | 9.1 (7.4, 10.7)      |
| Swaziland               | 4.9 (3.1, 6.7)       | 90.0<br>(88.0, 92.0) | 5.1 (3.8, 6.3)       | 7.3 (4.3, 10.2)      | 88.7<br>(85.2, 92.2) | 4.1 (2.8, 5.4)       | 3.4 (1.6, 5.2)       | 90.9<br>(88.7, 93.2) | 5.6 (3.7, 7.5)       | 5.4 (2.7, 8.0)         | 88.3<br>(85.0, 91.5) | 6.4 (4.8, 8.0)       | 4.8 (3.0, 6.5)         | 90.6<br>(88.7, 92.4) | 4.7 (3.0, 6.3)       |
| Tanzania                | 15.2<br>(12.2, 18.3) | 57.6<br>(52.2, 63.0) | 27.2<br>(22.8, 31.6) | 16.4<br>(12.5, 20.2) | 60.0<br>(53.7, 66.3) | 23.6<br>(18.8, 28.4) | 13.8<br>(10.9, 16.8) | 55.7<br>(50.5, 61.0) | 30.4<br>(26.1, 34.8) | 18.1<br>(14.3, 22.0)   | 50.7<br>(43.6, 57.7) | 31.2<br>(25.1, 37.2) | 12.8<br>(10.2, 15.4)   | 63.3<br>(57.6, 69.0) | 23.9<br>(19.3, 28.4) |
| Uganda                  | 1.6 (1.0, 2.2)       | 83.4<br>(81.5, 85.3) | 15.0<br>(12.9, 17.1) | 1.9 (0.9, 2.8)       | 86.9<br>(84.8, 89.1) | 11.2 (8.7, 13.7)     | 1.4 (0.6, 2.3)       | 80.1<br>(77.4, 82.7) | 18.5<br>(15.7, 21.3) | 1.4 (0.4, 2.4)         | 84.0<br>(80.1, 87.9) | 14.6<br>(10.9, 18.3) | 1.7 (1.1, 2.2)         | 83.3<br>(81.1, 85.5) | 15.1<br>(12.7, 17.4) |
| Zambia                  | 9.2 (6.0, 12.5)      | 70.6<br>(66.1, 75.2) | 20.2<br>(17.3, 23.1) | 8.9 (4.5, 13.3)      | 71.8<br>(66.0, 77.5) | 19.3<br>(14.9, 23.8) | 9.5 (5.4, 13.7)      | 70.1<br>(64.7, 75.5) | 20.4<br>(16.5, 24.3) | 12.0 (7.9, 16.2)       | 68.5<br>(62.3, 74.8) | 19.5<br>(15.4, 23.5) | 7.7 (4.7, 10.8)        | 71.7<br>(67.4, 76.1) | 20.5<br>(17.2, 23.9) |
| Zimbabwe                | 4.6 (3.6, 5.7)       | 90.4<br>(88.6, 92.2) | 5.0 (4.0, 6.0)       | 6.0 (4.4, 7.6)       | 89.4<br>(87.3, 91.6) | 4.6 (3.6, 5.6)       | 3.4 (2.4, 4.3)       | 91.3<br>(89.3, 93.3) | 5.3 (3.8, 6.8)       | 5.2 (2.7, 7.6)         | 90.0<br>(86.8, 93.3) | 4.8 (2.9, 6.6)       | 4.5 (3.6, 5.5)         | 90.5<br>(88.7, 92.2) | 5.0 (4, 6)           |
| <b>Pooled estimates</b> | <b>9.6 (6.3,</b>     | <b>74.9</b>          | <b>15.3</b>          | <b>10.6 (6.8,</b>    | <b>75 (68.0,</b>     | <b>14.2 (9.9,</b>    | <b>8.6 (5.6,</b>     | <b>75.0</b>          | <b>16.1 (11.5,</b>   | <b>10.1 (6.1,</b>      | <b>72.5</b>          | <b>17.0</b>          | <b>9.2 (6.2,</b>       | <b>76.2</b>          | <b>14.4</b>          |

|                          |                   |                   |                   |                   |                   |                   |                  |                   |                   |                   |                   |                   |                  |                   |                   |
|--------------------------|-------------------|-------------------|-------------------|-------------------|-------------------|-------------------|------------------|-------------------|-------------------|-------------------|-------------------|-------------------|------------------|-------------------|-------------------|
|                          | <b>12.8)</b>      | <b>(68.2,</b>     | <b>(10.9,</b>     | <b>14.5)</b>      | <b>81.9)</b>      | <b>18.6)</b>      | <b>11.6)</b>     | <b>(67.9,</b>     | <b>20.7)</b>      | <b>14.1)</b>      | <b>(64.8,</b>     | <b>(12.0,</b>     | <b>12.2)</b>     | <b>(69.8,</b>     | <b>(10.3,</b>     |
| <b>I<sup>2</sup> (%)</b> | <b>97.6</b>       | <b>81.6)</b>      | <b>19.8)</b>      |                   |                   |                   |                  | <b>82.0)</b>      |                   |                   | <b>80.3)</b>      | <b>22.0)</b>      |                  | <b>82.6)</b>      | <b>18.5)</b>      |
| <b>European Region</b>   |                   | <b>98.2</b>       | <b>98.0</b>       | <b>96.6</b>       | <b>97.5</b>       | <b>97.3</b>       | <b>96.4</b>      | <b>97.8</b>       | <b>96.8</b>       | <b>95.7</b>       | <b>96.5</b>       | <b>95.7</b>       | <b>97.4</b>      | <b>98.1</b>       | <b>97.7</b>       |
| Macedonia                | 3.0 (1.8, 4.2)    | 90.9 (89.4, 92.3) | 6.1 (4.2, 8.0)    | 4.2 (2.3, 6.2)    | 90.0 (87.5, 92.6) | 5.7 (3.5, 7.9)    | 1.6 (0.5, 2.8)   | 92.1 (90.1, 94.1) | 6.2 (3.9, 8.5)    | 3.7 (1.5, 6.0)    | 90.1 (88.5, 91.7) | 6.2 (4.1, 8.3)    | 2.6 (1.4, 3.7)   | 91.3 (89.2, 93.4) | 6.1 (3.6, 8.6)    |
| <b>Pooled estimates</b>  | –                 | –                 | –                 | –                 | –                 | –                 | –                | –                 | –                 | –                 | –                 | –                 | –                | –                 | –                 |
| <b>I<sup>2</sup> (%)</b> | –                 | –                 | –                 | –                 | –                 | –                 | –                | –                 | –                 | –                 | –                 | –                 | –                | –                 | –                 |
| <b>America Region</b>    |                   |                   |                   |                   |                   |                   |                  |                   |                   |                   |                   |                   |                  |                   |                   |
| Argentina                | 7.3 (6.7, 8.0)    | 79.7 (78.3, 81.1) | 12.9 (11.6, 14.3) | 10.3 (8.9, 11.7)  | 80.6 (78.8, 82.4) | 9.1 (7.9, 10.2)   | 4.6 (3.9, 5.2)   | 79.0 (77.0, 81.0) | 16.4 (14.4, 18.4) | 7.3 (5.9, 8.7)    | 79.9 (78.0, 81.8) | 12.8 (10.8, 14.8) | 7.4 (6.5, 8.2)   | 79.7 (78.0, 81.4) | 13.0 (11.6, 14.4) |
| Bahamas                  | 5.9 (4.4, 7.3)    | 84.3 (80.7, 87.8) | 9.9 (7.3, 12.4)   | 8.1 (6.2, 10.0)   | 82.8 (78.3, 87.3) | 9.1 (5.7, 12.5)   | 3.9 (2.3, 5.5)   | 85.5 (81.8, 89.1) | 10.6 (7.8, 13.5)  | 6.1 (4.5, 7.8)    | 83.2 (78.6, 87.7) | 10.7 (7.0, 14.4)  | 5.6 (3.6, 7.6)   | 85.5 (81.0, 89.9) | 9.0 (5.8, 12.1)   |
| Barbados                 | 3.6 (2.7, 4.6)    | 89.7 (88.0, 91.3) | 6.7 (5.0, 8.4)    | 4.4 (2.9, 5.9)    | 88.5 (85.8, 91.1) | 7.1 (4.7, 9.6)    | 2.8 (1.5, 4.1)   | 90.9 (88.2, 93.6) | 6.3 (3.7, 8.9)    | 3.4 (1.2, 5.5)    | 87.1 (83.6, 90.6) | 9.5 (4.9, 14.1)   | 3.7 (2.5, 4.9)   | 90.5 (88.5, 92.5) | 5.8 (4.0, 7.7)    |
| Belize                   | 2.0 (1.2, 2.8)    | 84.3 (81.0, 87.7) | 13.6 (10.6, 16.7) | 2.5 (1.3, 3.7)    | 85.5 (81.3, 89.7) | 12.0 (8.2, 15.8)  | 1.6 (0.5, 2.6)   | 83.2 (79.2, 87.2) | 15.2 (11.8, 18.6) | 1.9 (0.5, 3.2)    | 81.3 (75.7, 86.9) | 16.9 (11.8, 21.9) | 2.2 (1.5, 2.9)   | 87.1 (83.9, 90.2) | 10.7 (7.8, 13.7)  |
| Bolivia                  | 7.9 (6.6, 9.2)    | 84.7 (83.3, 86.1) | 7.4 (6.0, 8.8)    | 9.7 (7.8, 11.7)   | 83.4 (81.2, 85.6) | 6.9 (5.3, 8.4)    | 6.1 (4.7, 7.6)   | 86.3 (84.3, 88.3) | 7.6 (5.8, 9.4)    | 9.2 (7.4, 10.9)   | 82.7 (80.7, 84.7) | 8.1 (6.7, 9.5)    | 7.5 (6.1, 8.9)   | 85.4 (83.5, 87.3) | 7.1 (5.3, 9.0)    |
| Cayman                   | 4.6 (3.4, 5.9)    | 89.6 (87.8, 91.4) | 5.8 (4.4, 7.1)    | 5.9 (3.9, 7.9)    | 88.5 (85.9, 91.2) | 5.5 (3.7, 7.4)    | 3.3 (1.8, 4.7)   | 90.7 (88.3, 93.0) | 6.1 (4.2, 8.0)    | 5.4 (3.4, 7.4)    | 87.5 (84.7, 90.4) | 7.0 (4.9, 9.2)    | 4.0 (2.4, 5.7)   | 91.0 (88.7, 93.3) | 4.9 (3.2, 6.6)    |
| Costa Rica               | 1.8 (1.2, 2.3)    | 81.4 (79.4, 83.4) | 16.8 (15.1, 18.5) | 2.4 (1.3, 3.5)    | 83.9 (81.1, 86.7) | 13.7 (11.6, 15.8) | 1.2 (0.4, 1.9)   | 78.9 (76.5, 81.3) | 19.9 (17.9, 22.0) | 1.6 (0.4, 2.8)    | 81.0 (78.3, 83.7) | 17.4 (15.1, 19.7) | 1.9 (1.2, 2.5)   | 81.7 (79.0, 84.3) | 16.5 (14.3, 18.7) |
| Curaçao                  | 3.8 (2.9, 4.6)    | 91.0 (89.5, 92.5) | 5.2 (3.9, 6.5)    | 4.5 (2.8, 6.3)    | 90.7 (88.3, 93.1) | 4.7 (3.3, 6.2)    | 2.8 (1.8, 3.8)   | 91.5 (89.4, 93.6) | 5.7 (3.7, 7.7)    | 3.8 (2.2, 5.4)    | 92 (89.1, 94.9)   | 4.2 (2.2, 6.2)    | 3.8 (2.7, 4.9)   | 90.6 (88.8, 92.4) | 5.6 (4.0, 7.3)    |
| Ecuador                  | 12.8 (11.0, 14.7) | 87.1 (85.3, 88.9) | 0.1 (0.0, 0.1)    | 14.9 (12.7, 17.1) | 85.0 (82.9, 87.2) | 0.1 (0.0, 0.2)    | 10.1 (8.5, 11.8) | 89.7 (88.1, 91.4) | 0.1 (0.0, 0.3)    | 13.5 (11.5, 15.5) | 86.4 (84.4, 88.3) | 0.2 (0.0, 0.3)    | 12.0 (9.9, 14.2) | 88.0 (85.8, 90.1) | –                 |
| El Salvador              | 2.7 (1.8, 3.7)    | 85.5 (84.0, 86.9) | 11.8 (10.2, 13.4) | 2.9 (1.8, 3.9)    | 87.7 (85.4, 90.1) | 9.4 (7.1, 11.6)   | 1.9 (0.9, 2.9)   | 83.8 (81.5, 86.2) | 14.2 (11.6, 16.8) | 3.4 (1.7, 5.2)    | 86.3 (84.4, 88.3) | 10.2 (7.5, 13.0)  | 2.4 (1.4, 3.5)   | 85.1 (83.1, 87.1) | 12.5 (10.4, 14.5) |

|                                     |                       |                          |                         |                       |                          |                        |                       |                          |                         |                       |                          |                         |                       |                          |                         |
|-------------------------------------|-----------------------|--------------------------|-------------------------|-----------------------|--------------------------|------------------------|-----------------------|--------------------------|-------------------------|-----------------------|--------------------------|-------------------------|-----------------------|--------------------------|-------------------------|
| Grenada                             | 3.9 (2.4, 5.3)        | 86.5 (83.5, 89.4)        | 9.6 (7.1, 12.2)         | 5.7 (3.2, 8.3)        | 84.0 (79.6, 88.4)        | 10.3 (6.4, 14.1)       | 2.4 (1.0, 3.7)        | 88.4 (85.3, 91.6)        | 9.2 (6.1, 12.3)         | 2.8 (1.4, 4.1)        | 88.1 (85.1, 91.0)        | 9.2 (6.3, 12.1)         | 4.7 (2.7, 6.7)        | 85.4 (81.0, 89.8)        | 10 (6.6, 13.3)          |
| Guatemala                           | 5.8 (3.5, 8.0)        | 75.7 (73.3, 78.1)        | 18.5 (14.8, 22.2)       | 6.8 (2.9, 10.7)       | 77.8 (74.7, 81.0)        | 15.4 (12.2, 18.6)      | 4.8 (3.2, 6.5)        | 73.2 (69.4, 77.1)        | 22.0 (17.7, 26.2)       | 4.2 (3.1, 5.3)        | 79.2 (75.7, 82.7)        | 16.6 (13.3, 19.9)       | 6.6 (3.5, 9.7)        | 73.9 (69.9, 77.9)        | 19.5 (13.8, 25.3)       |
| Guyana                              | 4.2 (3.0, 5.5)        | 88.1 (85.7, 90.6)        | 7.6 (5.8, 9.4)          | 5.2 (3.3, 7.0)        | 86.7 (83.7, 89.8)        | 8.1 (6.1, 10.1)        | 3.3 (2.2, 4.5)        | 89.9 (87.7, 92.2)        | 6.7 (4.6, 8.9)          | 3.2 (1.6, 4.9)        | 90.3 (87.5, 93.0)        | 6.5 (4.6, 8.4)          | 4.7 (3.3, 6.0)        | 87.3 (84.5, 90.1)        | 8.0 (5.8, 10.3)         |
| Honduras                            | 4.1 (3.0, 5.3)        | 80.2 (77.9, 82.5)        | 15.7 (13.4, 17.9)       | 4.7 (3.1, 6.4)        | 82.9 (80.2, 85.7)        | 12.4 (10.0, 14.7)      | 3.4 (2.0, 4.8)        | 78.1 (74.2, 81.9)        | 18.5 (14.9, 22.1)       | 5.3 (3.9, 6.7)        | 78.6 (74.7, 82.6)        | 16.1 (12.5, 19.6)       | 3.1 (1.9, 4.3)        | 81.6 (79.1, 84.2)        | 15.3 (12.7, 17.9)       |
| Peru                                | 4.3 (3.3, 5.3)        | 86.4 (84.7, 88.1)        | 9.3 (7.8, 10.9)         | 4.7 (3.0, 6.5)        | 86.9 (84.5, 89.4)        | 8.3 (6.0, 10.7)        | 3.8 (2.5, 5.1)        | 86.0 (83.3, 88.7)        | 10.2 (7.9, 12.5)        | 3.1 (1.6, 4.5)        | 87.6 (84.4, 90.8)        | 9.3 (6.2, 12.5)         | 4.7 (3.5, 5.8)        | 86.0 (83.9, 88.0)        | 9.4 (7.7, 11.0)         |
| Saint Kitts and Nevis               | 3.9 (2.8, 5.0)        | 86.7 (84.9, 88.5)        | 9.4 (7.9, 11.0)         | 5.0 (3.2, 6.7)        | 85.1 (82.2, 88.0)        | 9.9 (7.5, 12.3)        | 2.9 (1.7, 4.1)        | 88.3 (86.0, 90.5)        | 8.9 (6.9, 10.8)         | 3.4 (1.4, 5.5)        | 85.6 (81.9, 89.2)        | 11.0 (7.8, 14.2)        | 4.0 (2.8, 5.3)        | 87.0 (84.9, 89.1)        | 9.0 (7.2, 10.7)         |
| Saint Lucia                         | 3.2 (2.2, 4.2)        | 90.5 (88.5, 92.5)        | 6.3 (4.2, 8.4)          | 4.7 (2.9, 6.6)        | 88.8 (86.0, 91.5)        | 6.5 (4.3, 8.8)         | 2.1 (1.1, 3.0)        | 91.8 (88.7, 94.9)        | 6.1 (3.2, 9.1)          | 2.4 (1.2, 3.5)        | 89.0 (87.0, 91.0)        | 8.7 (6.6, 10.8)         | 3.8 (2.4, 5.2)        | 91.6 (89.6, 93.5)        | 4.6 (3.0, 6.2)          |
| Saint Vincent and Grenadines        | 4.1 (2.7, 5.6)        | 81.9 (78.5, 85.4)        | 13.9 (11.1, 16.8)       | 5.1 (2.7, 7.5)        | 83.0 (79.2, 86.8)        | 11.9 (9.0, 14.9)       | 3.2 (1.8, 4.5)        | 81.2 (77.5, 84.8)        | 15.6 (11.7, 19.5)       | 3.9 (2.7, 5.2)        | 82.9 (78.1, 87.7)        | 13.2 (8.9, 17.4)        | 4.4 (2.5, 6.3)        | 80.9 (77.4, 84.4)        | 14.7 (11.6, 17.9)       |
| Trinidad and Tobago                 | 3.9 (2.5, 5.2)        | 92.1 (90.2, 94.0)        | 4.0 (2.8, 5.2)          | 3.9 (2.6, 5.3)        | 92.1 (89.9, 94.3)        | 4.0 (2.3, 5.6)         | 3.7 (2.0, 5.4)        | 92.2 (89.7, 94.6)        | 4.1 (2.2, 6.0)          | 2.9 (1.7, 4.1)        | 92.3 (90.1, 94.5)        | 4.8 (3.3, 6.3)          | 4.7 (3.1, 6.3)        | 91.9 (89.7, 94.2)        | 3.4 (1.8, 5.0)          |
| Uruguay                             | 2.6 (1.9, 3.2)        | 77.2 (75.4, 79.0)        | 20.3 (18.5, 22.0)       | 3.7 (2.4, 5.0)        | 80.5 (78.0, 83.0)        | 15.8 (13.7, 18.0)      | 1.6 (0.8, 2.3)        | 74.4 (71.9, 76.8)        | 24.1 (21.5, 26.7)       | 2.7 (1.6, 3.8)        | 78.1 (74.8, 81.4)        | 19.2 (16.1, 22.4)       | 2.5 (1.8, 3.2)        | 76.9 (74.9, 78.8)        | 20.6 (18.8, 22.5)       |
| Venezuela                           | 2.0 (1.6, 2.5)        | 82.8 (80.4, 85.1)        | 15.2 (13.0, 17.4)       | 2.1 (1.4, 2.9)        | 83.3 (79.5, 87.0)        | 14.6 (11.2, 18.1)      | 2.0 (1.4, 2.6)        | 82.3 (80.3, 84.4)        | 15.7 (13.7, 17.6)       | 2.4 (1.8, 3.1)        | 81.3 (77.8, 84.8)        | 16.3 (13.3, 19.3)       | 1.4 (0.9, 1.9)        | 85.2 (82.7, 87.6)        | 13.5 (11.0, 16.0)       |
| <b>Pooled estimates</b>             | <b>4.4 (3.5, 5.3)</b> | <b>85.1 (83.1, 87.0)</b> | <b>10.4 (7.2, 13.6)</b> | <b>5.5 (4.3, 6.7)</b> | <b>85.2 (83.6, 86.8)</b> | <b>9.2 (6.4, 12.0)</b> | <b>3.3 (2.6, 4.0)</b> | <b>85.1 (82.7, 87.5)</b> | <b>11.5 (7.8, 15.2)</b> | <b>4.3 (3.3, 5.3)</b> | <b>85.4 (81.6, 89.2)</b> | <b>10.8 (7.6, 13.9)</b> | <b>4.4 (3.5, 5.3)</b> | <b>85.7 (81.4, 89.9)</b> | <b>10.5 (8.3, 12.7)</b> |
| <b>I<sup>2</sup> (%)</b>            | <b>95.0</b>           | <b>95.4</b>              | <b>99.3</b>             | <b>92.7</b>           | <b>86.9</b>              | <b>98.6</b>            | <b>89.0</b>           | <b>94.7</b>              | <b>99.0</b>             | <b>90.9</b>           | <b>91.1</b>              | <b>98.5</b>             | <b>93.5</b>           | <b>96.0</b>              | <b>95.5</b>             |
| <b>Eastern Mediterranean Region</b> |                       |                          |                         |                       |                          |                        |                       |                          |                         |                       |                          |                         |                       |                          |                         |

|                    |      |                         |                         |                         |                         |                         |                         |                         |                         |                         |                         |                         |                         |                         |                         |                         |
|--------------------|------|-------------------------|-------------------------|-------------------------|-------------------------|-------------------------|-------------------------|-------------------------|-------------------------|-------------------------|-------------------------|-------------------------|-------------------------|-------------------------|-------------------------|-------------------------|
| Afghanistan        |      | 25.5<br>(19.5,<br>31.6) | 62.0<br>(58.3,<br>65.7) | 12.5 (8.2,<br>16.7)     | 31.5<br>(23.6,<br>39.5) | 59.7<br>(54.0,<br>65.5) | 8.7 (2.8,<br>14.7)      | 18.0<br>(12.8,<br>23.2) | 64.8<br>(62.1,<br>67.6) | 17.1<br>(12.0,<br>22.3) | 23.0<br>(15.4,<br>30.7) | 65.0<br>(57.6,<br>72.5) | 11.9 (6.8,<br>17.0)     | 26.5<br>(19.7,<br>33.2) | 60.9<br>(55.3,<br>66.5) | 12.7 (7.8,<br>17.5)     |
| Djibouti           |      | 10.6 (7.9,<br>13.2)     | 56.8<br>(53.4,<br>60.2) | 32.6<br>(29.5,<br>35.7) | 11.0 (7.5,<br>14.6)     | 56.8<br>(52.5,<br>61.1) | 32.2<br>(28.2,<br>36.1) | 9.9 (5.6,<br>14.2)      | 56.7<br>(50.3,<br>63.2) | 33.4<br>(27.9,<br>38.8) | 12.6 (6.4,<br>18.8)     | 63.6<br>(50.6,<br>76.5) | 23.9<br>(15.7,<br>32.0) | 10.2 (7.7,<br>12.7)     | 55.5<br>(51.4,<br>59.6) | 34.3<br>(30.4,<br>38.3) |
| Egypt              |      | 37.8<br>(32.9,<br>42.8) | 53.2<br>(47.9,<br>58.6) | 8.9 (6.4,<br>11.5)      | 40.3<br>(33.6,<br>47.0) | 49.9<br>(43.4,<br>56.4) | 9.8 (7.0,<br>12.7)      | 35.7<br>(28.9,<br>42.4) | 56.3<br>(49.6,<br>63.0) | 8.0 (5.1,<br>11.0)      | 38.8<br>(33.1,<br>44.5) | 52.6<br>(46.9,<br>58.4) | 8.6 (5.7,<br>11.4)      | 36.8<br>(27.9,<br>45.7) | 53.9<br>(45.3,<br>62.4) | 9.3 (4.4,<br>14.3)      |
| Iraq               |      | 21.5<br>(18.4,<br>24.5) | 67.8<br>(63.9,<br>71.7) | 10.8 (8.5,<br>13.0)     | 26.2<br>(22.4,<br>30.0) | 63.0<br>(57.7,<br>68.3) | 10.8 (7.5,<br>14.1)     | 15.8<br>(13.2,<br>18.5) | 73.4<br>(69.7,<br>77.1) | 10.7 (8.0,<br>13.5)     | 20.0<br>(16.1,<br>24.0) | 65.9<br>(60.5,<br>71.3) | 14.1<br>(10.2,<br>18.0) | 22.3<br>(18.8,<br>25.8) | 68.9<br>(64.0,<br>73.7) | 8.8 (6.7,<br>11.0)      |
| Jordan             |      | 23.5<br>(19.7,<br>27.3) | 69.4<br>(65.8,<br>72.9) | 7.1 (5.9,<br>8.4)       | 28.8<br>(25.9,<br>31.6) | 64.9<br>(61.7,<br>68.2) | 6.3 (4.8,<br>7.8)       | 18.5<br>(14.4,<br>22.6) | 73.5<br>(68.9,<br>78.2) | 7.9 (6.4,<br>9.5)       | 18.5<br>(11.9,<br>25.0) | 76.7<br>(69.9,<br>83.5) | 4.8 (1.6,<br>8.0)       | 24.2<br>(20.3,<br>28.0) | 68.4<br>(64.7,<br>72.1) | 7.5 (6.1,<br>8.8)       |
| Kuwait             |      | 14.9<br>(10.2,<br>19.6) | 79.2<br>(74.1,<br>84.3) | 5.9 (4.3,<br>7.5)       | 20.0<br>(14.9,<br>25.0) | 74.7<br>(68.8,<br>80.7) | 5.3 (3.4,<br>7.3)       | 9.5 (7.8,<br>11.1)      | 83.9<br>(80.8,<br>87.1) | 6.6 (4.3,<br>8.9)       | 14.6 (7.8,<br>21.3)     | 80.3<br>(73.0,<br>87.7) | 5.1 (3.2,<br>7.0)       | 15 (10.3,<br>19.7)      | 78.8<br>(73.4,<br>84.1) | 6.2 (4.2,<br>8.2)       |
| Lebanon            |      | 9.5 (7.8,<br>11.2)      | 83.5<br>(80.1,<br>86.9) | 7.0 (4.4,<br>9.6)       | 12.3 (9.2,<br>15.4)     | 80.5<br>(77.8,<br>83.3) | 7.1 (4.0,<br>10.3)      | 7.0 (3.7,<br>10.3)      | 86.1<br>(80.7,<br>91.5) | 6.9 (4.5,<br>9.3)       | 8.5 (6.3,<br>10.7)      | 85.0<br>(81.6,<br>88.4) | 6.5 (3.7,<br>9.3)       | 10.3 (8.1,<br>12.5)     | 82.4<br>(78.2,<br>86.6) | 7.4 (4.6,<br>10.1)      |
| Libya              |      | –                       | –                       | –                       | –                       | –                       | –                       | –                       | –                       | –                       | –                       | –                       | –                       | –                       | –                       | –                       |
| Morocco            |      | 31.6<br>(26.6,<br>36.5) | 54.8<br>(50.6,<br>59.1) | 13.6<br>(11.4,<br>15.8) | 35.6<br>(30.2,<br>41.0) | 52.0<br>(46.7,<br>57.3) | 12.4 (9.8,<br>15.1)     | 26.8<br>(22.2,<br>31.4) | 58.3<br>(54.6,<br>62.1) | 14.9<br>(11.8,<br>18.0) | 30.0<br>(24.9,<br>35.1) | 55.0<br>(49.9,<br>60.1) | 15.0<br>(11.4,<br>18.6) | 32.7<br>(27.5,<br>38.0) | 54.7<br>(49.8,<br>59.6) | 12.6<br>(10.0,<br>15.1) |
| Oman               |      | 15.4<br>(11.1,<br>19.6) | 77.1<br>(72.7,<br>81.5) | 7.5 (6.3,<br>8.8)       | 22.6<br>(18.1,<br>27.0) | 70.9<br>(66.2,<br>75.5) | 6.6 (5.4,<br>7.8)       | 8.7 (5.4,<br>11.9)      | 82.8<br>(79.1,<br>86.4) | 8.6 (6.8,<br>10.4)      | 12.0 (6.7,<br>17.3)     | 78.5<br>(72.4,<br>84.5) | 9.5 (6.7,<br>12.4)      | 16.4 (11.9,<br>20.8)    | 76.7<br>(71.9,<br>81.5) | 6.9 (5.7,<br>8.2)       |
| Pakistan           |      | 16.2<br>(12.4,<br>20.1) | 80.0<br>(76.4,<br>83.6) | 3.7 (2.0,<br>5.5)       | 22.3<br>(17.6,<br>27.0) | 73.7<br>(69.3,<br>78.0) | 4.1 (2.0,<br>6.1)       | 7.0 (5.0,<br>9.1)       | 89.7<br>(88.0,<br>91.3) | 3.3 (2.9,<br>3.7)       | 13.6 (8.7,<br>18.5)     | 82.5<br>(77.0,<br>88.1) | 3.9 (0.9,<br>6.8)       | 17.0<br>(12.9,<br>21.2) | 79.2<br>(75.5,<br>83.0) | 3.7 (2.2,<br>5.3)       |
| Qatar              |      | 19.2<br>(15.2,<br>23.3) | 61.6<br>(58.1,<br>65.1) | 19.2<br>(16.4,<br>22.0) | 26.0<br>(19.3,<br>32.6) | 59.6<br>(54.2,<br>64.9) | 14.5<br>(11.4,<br>17.6) | 12.9 (7.5,<br>18.3)     | 63.4<br>(58.4,<br>68.5) | 23.6<br>(18.9,<br>28.4) | 15.6<br>(12.8,<br>18.4) | 61.8<br>(58.3,<br>65.4) | 22.5<br>(18.6,<br>26.5) | 23.2<br>(15.8,<br>30.6) | 61.3<br>(54.9,<br>67.7) | 15.5<br>(11.8,<br>19.3) |
| Sudan              |      | 10.2 (7.1,<br>13.4)     | 77.2<br>(73.4,<br>81.0) | 12.6 (9.8,<br>15.4)     | 13.2 (8.7,<br>17.7)     | 76.6<br>(71.9,<br>81.4) | 10.2 (7.4,<br>12.9)     | 6.9 (4.2,<br>9.6)       | 78.0<br>(71.0,<br>85.0) | 15.1 (9.1,<br>21.2)     | 6.8 (0.9,<br>12.7)      | 79.6<br>(70.5,<br>88.7) | 13.6 (8.1,<br>19.1)     | 11.2 (7.8,<br>14.7)     | 76.5<br>(73.1,<br>79.9) | 12.3 (9.5,<br>15.0)     |
| Syrian<br>Republic | Arab | 33.5<br>(30.5,<br>36.6) | 61.7<br>(58.5,<br>64.9) | 4.8 (3.8,<br>5.7)       | 38.2<br>(35.5,<br>40.9) | 57.7<br>(54.5,<br>61.0) | 4.1 (3.0,<br>5.1)       | 28.6<br>(24.9,<br>32.4) | 65.9<br>(62.4,<br>69.4) | 5.5 (4.5,<br>6.5)       | 33.5<br>(29.8,<br>37.3) | 61.1<br>(57.7,<br>64.6) | 5.3 (3.8,<br>6.9)       | 33.5<br>(30.1,<br>36.9) | 62.2<br>(58.4,<br>65.9) | 4.3 (3.0,<br>5.6)       |



|                               |      |                          |                          |                         |                          |                          |                        |                          |                          |                         |                          |                          |                        |                          |                          |                         |
|-------------------------------|------|--------------------------|--------------------------|-------------------------|--------------------------|--------------------------|------------------------|--------------------------|--------------------------|-------------------------|--------------------------|--------------------------|------------------------|--------------------------|--------------------------|-------------------------|
| Tunisia                       |      | 11.5 (9.7, 13.3)         | 80.2 (77.6, 82.8)        | 8.3 (6.6, 10.0)         | 15.4 (12.4, 18.3)        | 77.1 (73.7, 80.5)        | 7.6 (5.6, 9.5)         | 7.7 (5.8, 9.5)           | 83.1 (79.9, 86.2)        | 9.2 (6.8, 11.7)         | 9.3 (6.7, 12.0)          | 82.7 (79.0, 86.3)        | 8.0 (5.4, 10.6)        | 13.2 (11.6, 14.8)        | 78.2 (75.9, 80.5)        | 8.6 (7.0, 10.2)         |
| United Arab Emirates          | Arab | 14.6 (10.9, 18.4)        | 76.2 (72.1, 80.3)        | 9.2 (7.4, 11.0)         | 23.4 (20.2, 26.5)        | 67.7 (62.4, 73.1)        | 8.9 (5.8, 12.0)        | 8.7 (6.6, 10.8)          | 81.9 (78.8, 84.9)        | 9.4 (7.8, 11.0)         | 13.4 (9.4, 17.5)         | 76.9 (71.8, 82.1)        | 9.6 (7.8, 11.4)        | 15.2 (10.9, 19.4)        | 75.9 (71.3, 80.4)        | 9.0 (6.9, 11.0)         |
| UNRWA                         |      | 30.3 (28.2, 32.4)        | 61.9 (60.0, 63.9)        | 7.7 (6.7, 8.8)          | 37.8 (36.5, 39.2)        | 55.8 (54.2, 57.4)        | 6.3 (5.5, 7.2)         | 23.2 (21.8, 24.7)        | 67.8 (66.0, 69.5)        | 9.0 (8.2, 9.8)          | 29.0 (26.3, 31.6)        | 61.8 (59.1, 64.4)        | 9.2 (7.7, 10.8)        | 31.2 (28.9, 33.4)        | 62.0 (59.7, 64.3)        | 6.8 (5.8, 7.8)          |
| Yemen                         |      | 35.7 (26.1, 45.3)        | 55.4 (46.5, 64.3)        | 8.9 (6.4, 11.5)         | 39.5 (27.4, 51.6)        | 50.0 (39.8, 60.1)        | 10.5 (7.4, 13.6)       | 29.0 (14.0, 43.9)        | 64.7 (50.0, 79.3)        | 6.4 (1.7, 11.0)         | 33.5 (19.7, 47.4)        | 58.7 (46.7, 70.6)        | 7.8 (3.6, 12.0)        | 37.0 (28.7, 45.4)        | 53.3 (44.9, 61.7)        | 9.7 (5.4, 13.9)         |
| <b>Pooled estimates</b>       |      | <b>21.0 (16.5, 25.6)</b> | <b>68.2 (63.5, 73.0)</b> | <b>10.4 (8.2, 12.6)</b> | <b>25.9 (20.6, 31.2)</b> | <b>64.3 (59.3, 69.4)</b> | <b>9.4 (7.5, 11.4)</b> | <b>15.5 (11.7, 19.3)</b> | <b>72.6 (67.1, 78.1)</b> | <b>10.8 (8.7, 12.9)</b> | <b>19.3 (14.6, 24.0)</b> | <b>70.0 (64.5, 75.4)</b> | <b>9.9 (7.9, 11.9)</b> | <b>21.8 (17.4, 26.1)</b> | <b>67.8 (63.3, 72.4)</b> | <b>10.0 (8.0, 12.0)</b> |
| <b>I<sup>2</sup> (%)</b>      |      | <b>97.1</b>              | <b>96.6</b>              | <b>96.3</b>             | <b>97.4</b>              | <b>96.4</b>              | <b>93.8</b>            | <b>96.7</b>              | <b>97.8</b>              | <b>96.7</b>             | <b>95.5</b>              | <b>95.1</b>              | <b>88.2</b>            | <b>96.4</b>              | <b>95.3</b>              | <b>94.4</b>             |
| <b>Southeast Asia Region</b>  |      |                          |                          |                         |                          |                          |                        |                          |                          |                         |                          |                          |                        |                          |                          |                         |
| Bangladesh                    |      | 12.2 (10.3, 14.1)        | 86.9 (84.8, 88.9)        | 0.9 (0.3, 1.5)          | 14.6 (12.4, 16.8)        | 84.2 (81.9, 86.6)        | 1.2 (0.7, 1.7)         | 8.2 (5.7, 10.7)          | 91.3 (88.9, 93.8)        | 0.4 (0.1, 0.8)          | 10.6 (8.2, 12.9)         | 88.0 (85.4, 90.6)        | 1.4 (0.7, 2.1)         | 12.9 (10.2, 15.6)        | 86.4 (83.5, 89.3)        | 0.7 (0.0, 1.5)          |
| India                         |      | 4.4 (3.5, 5.3)           | 94.0 (92.9, 95.1)        | 1.6 (1.2, 2.0)          | 4.8 (3.8, 5.8)           | 93.7 (92.3, 95.1)        | 1.5 (0.9, 2.1)         | 3.9 (2.8, 4.9)           | 94.4 (93.1, 95.7)        | 1.7 (1.1, 2.3)          | 4.0 (3.1, 5.0)           | 93.9 (92.6, 95.2)        | 2.1 (1.4, 2.8)         | 4.6 (3.5, 5.8)           | 94 (92.6, 95.5)          | 1.3 (0.9, 1.8)          |
| Indonesia                     |      | 2.5 (1.9, 3.0)           | 94.2 (93.2, 95.1)        | 3.4 (2.7, 4.0)          | 3.7 (2.9, 4.4)           | 93.0 (91.7, 94.4)        | 3.3 (2.4, 4.1)         | 1.3 (0.8, 1.8)           | 95.3 (94.3, 96.2)        | 3.5 (2.7, 4.3)          | 2.5 (1.7, 3.2)           | 93.7 (92.5, 94.9)        | 3.8 (3.1, 4.6)         | 2.4 (1.8, 3.1)           | 94.7 (93.7, 95.7)        | 2.9 (2.3, 3.5)          |
| Thailand                      |      | 5.5 (4.3, 6.7)           | 90.2 (88.3, 92.0)        | 4.4 (3.1, 5.6)          | 8.6 (6.3, 11.0)          | 86.4 (83.8, 89.0)        | 5.0 (3.4, 6.5)         | 2.4 (1.4, 3.4)           | 93.8 (92.0, 95.6)        | 3.8 (2.6, 4.9)          | 5.9 (4.3, 7.5)           | 89.0 (86.5, 91.5)        | 5.1 (3.1, 7.0)         | 5.2 (3.6, 6.7)           | 91.1 (89.0, 93.1)        | 3.8 (2.6, 5.0)          |
| Timor-Leste                   |      | 18.4 (15.2, 21.6)        | 75.8 (72.6, 78.9)        | 5.8 (4.3, 7.4)          | 19.7 (16.1, 23.4)        | 75.9 (72, 79.8)          | 4.4 (2.8, 6.0)         | 15.8 (12.9, 18.7)        | 77.0 (73.3, 80.6)        | 7.3 (5.3, 9.2)          | 22.5 (19.4, 25.7)        | 70.0 (66.6, 73.4)        | 7.5 (5.1, 9.8)         | 17.0 (13.0, 21.0)        | 77.7 (73.5, 81.9)        | 5.3 (3.9, 6.7)          |
| <b>Pooled estimates</b>       |      | <b>8.3 (4.9, 11.7)</b>   | <b>88.4 (84.1, 92.8)</b> | <b>3.1 (1.7, 4.4)</b>   | <b>10.0 (5.9, 14)</b>    | <b>86.9 (81.9, 91.8)</b> | <b>2.9 (1.7, 4.2)</b>  | <b>5.9 (3.1, 8.8)</b>    | <b>90.8 (87.1, 94.4)</b> | <b>3.2 (1.4, 4.9)</b>   | <b>8.8 (4.8, 12.9)</b>   | <b>7.1 (81.3, 92.9)</b>  | <b>3.6 (2.1, 5.1)</b>  | <b>7.9 (4.6, 11.3)</b>   | <b>89.2 (85.4, 93.1)</b> | <b>2.7 (1.4, 4.0)</b>   |
| <b>I<sup>2</sup> (%)</b>      |      | <b>97.8</b>              | <b>97.5</b>              | <b>94.4</b>             | <b>97.4</b>              | <b>96.8</b>              | <b>91.0</b>            | <b>96.9</b>              | <b>95.8</b>              | <b>96.4</b>             | <b>97.8</b>              | <b>97.9</b>              | <b>91.3</b>            | <b>96.3</b>              | <b>95.4</b>              | <b>93.3</b>             |
| <b>Western Pacific Region</b> |      |                          |                          |                         |                          |                          |                        |                          |                          |                         |                          |                          |                        |                          |                          |                         |
| Brunei                        |      | 2.2 (1.5, 3.0)           | 87.7                     | 10.1 (8.6, 11.6)        | 2.7 (1.7, 3.7)           | 88.0                     | 9.3 (7.0, 11.6)        | 1.6 (0.9, 2.3)           | 87.6                     | 10.7 (8.7, 12.7)        | 2.3 (1.2, 3.4)           | 86.0                     | 11.7 (8.4, 15.0)       | 2.1 (1.3, 2.9)           | 88.5                     | 9.4 (7.6, 11.2)         |

|             |                   |                   |                   |                   |                   |                   |                   |                   |                   |                   |                   |                   |                   |                   |                   |
|-------------|-------------------|-------------------|-------------------|-------------------|-------------------|-------------------|-------------------|-------------------|-------------------|-------------------|-------------------|-------------------|-------------------|-------------------|-------------------|
| Darussalam  | 2.8               | (86.1, 89.4)      | 11.6              | 3.7               | (85.3, 90.6)      | 11.6              | 2.4               | (85.5, 89.7)      | 12.8              | 3.5               | (82.5, 89.5)      | 15.0              | 2.9               | (86.5, 90.5)      | 11.1              |
| Cambodia    | 4.7 (3.4, 6.1)    | 93.9 (92.5, 95.3) | 1.4 (0.8, 2.0)    | 5.3 (3.8, 6.8)    | 93.8 (92.1, 95.4) | 0.9 (0.0, 1.9)    | 4.1 (1.9, 6.2)    | 94.1 (92.0, 96.3) | 1.8 (1.0, 2.6)    | 6.1 (3.8, 8.5)    | 92.9 (90.9, 95.0) | 0.9 (0.0, 1.8)    | 4.2 (2.6, 5.8)    | 94.2 (92.4, 96.1) | 1.6 (0.8, 2.3)    |
| China       | 2.7 (2.1, 3.3)    | 94.0 (93.3, 94.7) | 3.3 (2.7, 3.9)    | 3.4 (2.5, 4.3)    | 93.0 (92.2, 93.9) | 3.5 (2.8, 4.3)    | 1.8 (1.2, 2.5)    | 95.1 (94.0, 96.1) | 3.1 (2.2, 4.0)    | 2.8 (1.9, 3.8)    | 93.0 (91.6, 94.4) | 4.1 (3.0, 5.3)    | 2.6 (1.8, 3.3)    | 94.8 (94.1, 95.5) | 2.6 (2.2, 3.1)    |
| Cook        | 12.6 (8.4, 16.7)  | 77.1 (73.5, 80.7) | 10.3 (8.2, 12.5)  | 14.9 (8.5, 21.3)  | 75.8 (69.5, 82.0) | 9.3 (4.9, 13.7)   | 10.0 (5.5, 14.6)  | 79.0 (73.7, 84.2) | 11.0 (7.1, 14.9)  | 5.7 (0.0, 13.0)   | 86.8 (79.1, 94.5) | 7.5 (4.7, 10.2)   | 14.1 (9.0, 19.2)  | 74.9 (70.3, 79.6) | 11.0 (8.2, 13.8)  |
| Kiribati    | 19.4 (16.0, 22.8) | 66.6 (61.9, 71.3) | 14.0 (11.3, 16.6) | 24.8 (19.5, 30.1) | 59.1 (52.6, 65.7) | 16.1 (12.1, 20.0) | 14.9 (12.1, 17.7) | 72.8 (68.5, 77.1) | 12.2 (9.4, 15.1)  | 21.6 (17.2, 26.0) | 60.8 (55.3, 66.3) | 17.6 (13.3, 22.0) | 18.5 (14.7, 22.4) | 69.0 (63.4, 74.5) | 12.5 (9.8, 15.2)  |
| Laos        | 2.3 (1.1, 3.5)    | 94.1 (92.8, 95.4) | 3.6 (2.5, 4.7)    | 1.8 (0.4, 3.1)    | 93.6 (91.4, 95.7) | 4.7 (2.9, 6.4)    | 2.8 (1.3, 4.3)    | 94.5 (93.0, 96.1) | 2.7 (1.4, 4.1)    | 2.9 (0.3, 5.6)    | 92.4 (87.1, 97.7) | 4.7 (0.6, 8.8)    | 2.2 (1.0, 3.4)    | 94.3 (93.0, 95.6) | 3.5 (2.1, 4.8)    |
| Malaysia    | 2.8 (2.4, 3.3)    | 85.9 (84.8, 87.1) | 11.2 (10.3, 12.2) | 3.9 (3.3, 4.5)    | 85.0 (83.6, 86.4) | 11.1 (10.0, 12.3) | 1.8 (1.3, 2.4)    | 86.9 (85.3, 88.4) | 11.3 (9.9, 12.7)  | 3.4 (2.6, 4.1)    | 83.0 (81.2, 84.9) | 13.6 (11.9, 15.3) | 2.6 (2.0, 3.1)    | 87.4 (86.2, 88.7) | 10.0 (9.0, 11.0)  |
| Mongolia    | 5.5 (4.5, 6.5)    | 83.8 (82.2, 85.4) | 10.8 (9.3, 12.2)  | 7.0 (5.5, 8.5)    | 81.3 (79.4, 83.3) | 11.7 (9.8, 13.6)  | 4.0 (3.0, 5.0)    | 86.2 (84.1, 88.3) | 9.8 (8.1, 11.5)   | 5.9 (4.5, 7.4)    | 80.7 (78.2, 83.3) | 13.3 (11.1, 15.6) | 5.1 (4.0, 6.2)    | 86.2 (84.3, 88.1) | 8.7 (7.1, 10.3)   |
| Nauru       | 13.2 (9.4, 16.9)  | 52.6 (47.1, 58.0) | 34.3 (29.1, 39.5) | 17.7 (11.4, 24.1) | 46.1 (37.7, 54.4) | 36.2 (28.2, 44.3) | 9.3 (5.1, 13.5)   | 57.6 (50.4, 64.7) | 33.2 (26.3, 40.0) | 12.9 (7.4, 18.4)  | 49.2 (40.8, 57.6) | 37.9 (29.7, 46.0) | 13.4 (8.3, 18.4)  | 55.5 (48.3, 62.6) | 31.2 (24.5, 37.9) |
| Philippines | 5.8 (3.2, 8.3)    | 85.9 (83.6, 88.2) | 8.3 (7.1, 9.5)    | 6.8 (4.4, 9.2)    | 84.7 (82.1, 87.2) | 8.5 (6.9, 10.2)   | 4.7 (1.7, 7.8)    | 87.1 (84.4, 89.9) | 8.1 (6.7, 9.6)    | 4.8 (2.3, 7.4)    | 86.9 (83.8, 90.0) | 8.3 (6.5, 10.1)   | 6.3 (2.9, 9.7)    | 85.4 (82.6, 88.1) | 8.4 (7.0, 9.7)    |
| Samoa       | 17.6 (14.1, 21.2) | 57.0 (52.9, 61.1) | 25.3 (22.0, 28.6) | 22.1 (17.1, 27.0) | 54.4 (48.8, 60.1) | 23.5 (20.0, 27.0) | 13.5 (9.5, 17.4)  | 59.5 (55.9, 63.1) | 27.0 (23.3, 30.7) | 21.4 (16.1, 26.7) | 51.8 (46.0, 57.7) | 26.7 (22.9, 30.6) | 16.4 (12.1, 20.7) | 58.7 (54.0, 63.5) | 24.8 (21.1, 28.5) |
| Solomon     | 22.9 (18.4, 27.4) | 58.0 (51.0, 64.9) | 19.1 (12.8, 25.3) | 26.6 (22.2, 31.0) | 57.5 (51.7, 63.3) | 15.9 (11.2, 20.7) | 19.1 (13.8, 24.3) | 57.8 (46.9, 68.7) | 23.1 (12.6, 33.7) | 23.0 (16.0, 29.9) | 58.8 (46.3, 71.3) | 18.2 (6.2, 30.2)  | 22.9 (18.2, 27.6) | 57.7 (52.0, 63.4) | 19.4 (14.1, 24.6) |
| Tokelau     | 16.5 (8.0, 25.1)  | 69.6 (58.9, 80.3) | 13.9 (5.8, 22.0)  | 20.9 (7.5, 34.2)  | 71.8 (57.4, 86.2) | 7.3 (0.0, 14.6)   | 11.5 (1.4, 21.5)  | 65.5 (48.3, 82.8) | 23.0 (7.0, 38.9)  | 18.2 (5.4, 31.0)  | 72.1 (57.1, 87.2) | 9.7 (0.0, 19.8)   | 14.5 (3.1, 25.8)  | 66.4 (50.7, 82.1) | 19.2 (5.7, 32.6)  |
| Tonga       | 9.2 (7.5, 10.9)   | 68.1 (64.7, 71.5) | 22.7 (19.9, 25.5) | 11.5 (8.6, 14.4)  | 65.5 (60.5, 70.5) | 23.0 (18.8, 27.2) | 6.8 (5.3, 8.4)    | 70.7 (66.5, 74.9) | 22.5 (18.8, 26.2) | 10.1 (7.5, 12.8)  | 64.1 (58.0, 70.2) | 25.8 (20.4, 31.2) | 8.8 (7.0, 10.7)   | 69.6 (66.3, 72.9) | 21.6 (18.6, 24.6) |

|                          |                        |                     |                          |                         |                     |                        |                       |                     |                          |                        |                     |                         |                        |                     |                        |
|--------------------------|------------------------|---------------------|--------------------------|-------------------------|---------------------|------------------------|-----------------------|---------------------|--------------------------|------------------------|---------------------|-------------------------|------------------------|---------------------|------------------------|
|                          |                        | 71.4)               | 25.6)                    |                         | 70.5)               | 27.3)                  |                       | 74.9)               | 26.2)                    |                        | 70.1)               | 31.2)                   |                        | 72.8)               | 24.5)                  |
|                          |                        | 56.3                | 35.8                     |                         | 52.0                | 36.2                   |                       | 60.2                | 35.5                     |                        | 49.8                | 41.4                    |                        | 64.8                | 28.5                   |
| Tuvalu                   | 7.9 (5.8, 9.9)         | (52.5, 60.1)        | (32.1, 39.4)             | 11.8 (8.4, 15.3)        | (46.5, 57.5)        | (30.8, 41.5)           | 4.2 (2.0, 6.5)        | (55.0, 65.5)        | (30.4, 40.7)             | 8.8 (6.0, 11.6)        | (44.8, 54.9)        | (36.4, 46.4)            | 6.7 (3.7, 9.7)         | (59.2, 70.4)        | (23.2, 33.7)           |
|                          |                        | 60.4                | 20.4                     | 20.6                    | 59.6                | 19.8                   | 17.5                  | 60.9                | 21.6                     | 21.7                   | 53.8                | 24.5                    | 16.4 (11.2, 21.5)      | 67.6                | 16.0 (9.2, 22.8)       |
| Vanuatu                  | 19.1 (15.1, 23.2)      | (52.8, 68.1)        | (15.3, 25.6)             | (12.8, 28.5)            | (50.4, 68.8)        | (13.1, 26.5)           | (13.5, 21.4)          | (53.8, 68.0)        | (13.7, 29.6)             | (15.0, 28.3)           | (42.5, 65.2)        | (17.2, 31.8)            |                        | (59.1, 76.1)        |                        |
|                          |                        | 95.4                | 1.2 (0.8, 1.5)           | 4.8 (3.0, 6.5)          | 94.4                | 0.8 (0.1, 1.6)         | 2.2 (1.3, 3.2)        | 96.3                | 1.4 (1.0, 1.9)           | –                      | –                   | –                       | 3.4 (2.4, 4.3)         | 95.5                | 1.2 (0.8, 1.5)         |
| Vietnam                  | 3.4 (2.4, 4.4)         | (94.4, 96.5)        |                          |                         | (92.6, 96.2)        |                        |                       | (95.2, 97.5)        |                          |                        |                     |                         |                        | (94.4, 96.5)        |                        |
|                          |                        | 74.0                | 16.7                     | 13.0 (9.5, 16.4)        | 72.3                | 14.7                   | 5.7 (2.8, 8.5)        | 76.0                | 18.3                     | 10.4 (6.5, 14.4)       | 70.4                | 19.1                    | 8.4 (5.7, 11.1)        | 76.4                | 15.2                   |
| Wallis and Futuna        | 9.2 (7.0, 11.5)        | (70.3, 77.8)        | (13.2, 20.3)             |                         | (67.1, 77.6)        | (10.1, 19.3)           |                       | (70.5, 81.5)        | (13.5, 23.2)             |                        | (66.3, 74.6)        | (13.7, 24.6)            |                        | (71.9, 81.0)        | (11.4, 19.0)           |
|                          |                        | <b>76.2</b>         | <b>14.1 (11.3, 16.8)</b> | <b>10.6 (8.6, 12.6)</b> | <b>74.6</b>         | <b>13.3</b>            | <b>6.5 (5.0, 7.9)</b> | <b>78.1</b>         | <b>14.1 (11.2, 16.9)</b> | <b>9.3 (7.2, 11.3)</b> | <b>73.1</b>         | <b>16.4</b>             | <b>8.0 (6.5, 9.6)</b>  | <b>78.0</b>         | <b>12.4</b>            |
| <b>Pooled estimates</b>  | <b>8.8 (7.2, 10.4)</b> | <b>(71.8, 80.5)</b> |                          |                         | <b>(69.9, 79.2)</b> | <b>(10.4, 16.3)</b>    |                       | <b>(73.6, 82.6)</b> | <b>(13.5, 23.2)</b>      |                        | <b>(67.1, 79.1)</b> | <b>(12.2, 20.6)</b>     |                        | <b>(74.1, 82.0)</b> | <b>(10.1, 14.8)</b>    |
| <b>I<sup>2</sup> (%)</b> | <b>96.3</b>            | <b>99.0</b>         | <b>99.0</b>              | <b>95.3</b>             | <b>98.4</b>         | <b>98.0</b>            | <b>94.0</b>           | <b>98.4</b>         | <b>98.2</b>              | <b>93.3</b>            | <b>98.0</b>         | <b>97.9</b>             | <b>94.5</b>            | <b>98.5</b>         | <b>98.4</b>            |
| <b>Total</b>             |                        |                     |                          |                         |                     |                        |                       |                     |                          |                        |                     |                         |                        |                     |                        |
|                          |                        | <b>80.9</b>         | <b>9.7 (5.8, 13.6)</b>   | <b>10.6 (6.6, 14.5)</b> | <b>79.6</b>         | <b>8.9 (5.3, 12.5)</b> | <b>6.4 (3.9, 9.0)</b> | <b>82.7</b>         | <b>10.1 (6.1, 14.1)</b>  | <b>8.8 (5.4, 12.3)</b> | <b>80.0</b>         | <b>10.2 (6.5, 14.0)</b> | <b>8.4 (5.3, 11.6)</b> | <b>81.5</b>         | <b>9.2 (5.4, 13.0)</b> |
| <b>Pooled estimates</b>  | <b>8.6 (5.5, 11.7)</b> | <b>(74.7, 87.1)</b> |                          |                         | <b>(73.1, 86.1)</b> |                        |                       | <b>(76.9, 88.5)</b> | <b>(10.1, 14.1)</b>      | <b>(8.8, 12.3)</b>     | <b>(72.8, 87.3)</b> | <b>(10.2, 14.0)</b>     | <b>(8.4, 11.6)</b>     | <b>(74.1, 88.9)</b> | <b>(9.2, 13.0)</b>     |
| <b>I<sup>2</sup> (%)</b> | <b>94.6</b>            | <b>96.1</b>         | <b>94.1</b>              | <b>93.8</b>             | <b>95.3</b>         | <b>93.5</b>            | <b>93.6</b>           | <b>94.0</b>         | <b>93.0</b>              | <b>91.9</b>            | <b>94.2</b>         | <b>92.7</b>             | <b>95.0</b>            | <b>95.6</b>         | <b>94.7</b>            |

**Table S6 Prevalence of washing hands across different BMI levels**

|                          | Never washing hands before eating |                   |                  |                   | Never washing hands after using the toilet |                   |                  |                  | Never washing hands with soap |                   |                   |                   |
|--------------------------|-----------------------------------|-------------------|------------------|-------------------|--------------------------------------------|-------------------|------------------|------------------|-------------------------------|-------------------|-------------------|-------------------|
|                          | Underweight                       | Normal            | Overweight       | Obese             | Underweight                                | Normal            | Overweight       | Obese            | Underweight                   | Normal            | Overweight        | Obese             |
| <b>Africa Region</b>     |                                   |                   |                  |                   |                                            |                   |                  |                  |                               |                   |                   |                   |
| Algeria                  | 7.5 (1.4, 13.5)                   | 5.5 (4.5, 6.4)    | 5.7 (2.7, 8.8)   | 5.3 (1.2, 9.3)    | 3.0 (0.1, 5.9)                             | 2.8 (1.9, 3.7)    | 3.6 (1.1, 6.0)   | 1.9 (0.0, 3.9)   | 3.8 (0.0, 7.8)                | 5.2 (4.3, 6.0)    | 5.3 (1.9, 8.7)    | 4.2 (1.1, 7.4)    |
| Ghana                    | 8.9 (1.3, 16.6)                   | 8.3 (6.7, 9.9)    | 8.5 (4.5, 12.4)  | 9.9 (4.7, 15.0)   | 12.5 (6.3, 18.7)                           | 11.7 (9.4, 14.0)  | 11.1 (6.6, 15.6) | 10.4 (6.8, 14.0) | 16.2 (10.2, 22.3)             | 12.5 (10.3, 14.7) | 16.4 (12.6, 20.2) | 15.4 (9.3, 21.6)  |
| Kenya                    | –                                 | 6.4 (2.9, 9.9)    | 7.7 (6.6, 8.8)   | 7.9 (5.5, 10.4)   | –                                          | 15.1 (11.2, 19.0) | 22.3 (9.3, 35.3) | 13.4 (9.3, 17.5) | 18.6 (18.3, 18.9)             | 20.7 (15.3, 26.1) | 31.7 (12.6, 50.8) | –                 |
| Namibia                  | 1.3 (1.1, 1.6)                    | 5.3 (3.8, 6.8)    | 7.0 (2.9, 11.1)  | 9.8 (1.4, 18.3)   | 8.8 (2.4, 15.1)                            | 6.5 (4.9, 8.1)    | 4.4 (2.0, 6.7)   | 6.8 (2.9, 10.7)  | 10.2 (4.3, 16.1)              | 10.5 (7.8, 13.3)  | 8.8 (5.6, 11.9)   | 11.0 (4.3, 17.8)  |
| Senegal                  | 36.0 (17.2, 54.8)                 | 17.6 (2.8, 32.4)  | 7.1 (0.0, 17.1)  | 6.4 (0.0, 17.4)   | 34.7 (15.8, 53.5)                          | 14.6 (0.0, 31.5)  | 5.8 (0.0, 16.0)  | 6.4 (0.0, 17.4)  | 34.7 (15.8, 53.5)             | 19.4 (5.2, 33.7)  | 10.7 (0.8, 20.6)  | 9.6 (0.0, 20.9)   |
| Swaziland                | 7.8 (3.6, 11.9)                   | 3.2 (1.5, 4.8)    | 4.9 (0.6, 9.2)   | 3.3 (0.0, 7.0)    | 1.8 (0.0, 5.7)                             | 2.9 (2.0, 3.8)    | 4.3 (1.1, 7.6)   | –                | 8.7 (4.0, 13.3)               | 11.8 (9.5, 14.1)  | 12.6 (5.9, 19.4)  | 11.6 (3.2, 20.1)  |
| Uganda                   | 5.4 (2.9, 7.9)                    | 6.3 (4.3, 8.2)    | 6.8 (2.9, 10.8)  | 8.6 (2.9, 14.2)   | 5.1 (2.6, 7.5)                             | 7.8 (5.2, 10.4)   | 8.9 (4.0, 13.8)  | 8.1 (1.3, 14.9)  | 11.9 (3.8, 20.0)              | 14.3 (11.8, 16.7) | 18.9 (10.9, 27.0) | 14.1 (6.2, 22.1)  |
| <b>Pooled estimates</b>  | 6.9 (2.8, 11.0)                   | 5.9 (4.5, 7.3)    | 7.3 (6.4, 8.3)   | 6.8 (5.0, 8.7)    | 6.5 (2.8, 10.2)                            | 7.6 (4.8, 10.4)   | 6.6 (3.9, 9.2)   | 7.8 (3.4, 12.2)  | 13.1 (7.0, 19.3)              | 12.6 (8.5, 16.7)  | 12.6 (8.1, 17.2)  | 10.6 (5.9, 15.2)  |
| <b>I<sup>2</sup> (%)</b> | 87.6                              | 73.2              | 0.0              | 19.1              | 78.0                                       | 94.3              | 66.3             | 85.9             | 93.0                          | 95.0              | 79.1              | 66.5              |
| <b>European Region</b>   |                                   |                   |                  |                   |                                            |                   |                  |                  |                               |                   |                   |                   |
| Macedonia                | 3.2 (0.0, 8.2)                    | 2.0 (1.1, 2.9)    | 0.8 (0.0, 2.6)   | 2.7 (0.0, 7.4)    | 1.8 (0.0, 5.6)                             | 1.7 (0.7, 2.6)    | 2.4 (0.0, 5.7)   | 1.2 (0.0, 3.8)   | 9.7 (3.5, 16.0)               | 3.4 (1.7, 5.0)    | 3.9 (0.0, 8.3)    | 1.7 (0.0, 5.8)    |
| <b>Pooled estimates</b>  | –                                 | –                 | –                | –                 | –                                          | –                 | –                | –                | –                             | –                 | –                 | –                 |
| <b>I<sup>2</sup> (%)</b> | –                                 | –                 | –                | –                 | –                                          | –                 | –                | –                | –                             | –                 | –                 | –                 |
| <b>America Region</b>    |                                   |                   |                  |                   |                                            |                   |                  |                  |                               |                   |                   |                   |
| Argentina                | 10.0 (6.9, 13.0)                  | 11.0 (9.4, 12.5)  | 9.9 (6.7, 13.1)  | 9.4 (6.6, 12.3)   | 8.6 (6.7, 10.5)                            | 5.8 (4.6, 6.9)    | 5.0 (2.7, 7.3)   | 3.1 (1.8, 4.5)   | 10.3 (6.0, 14.6)              | 5.4 (4.4, 6.3)    | 5.7 (3.3, 8.1)    | 6.0 (3.4, 8.5)    |
| Barbados                 | 15.9 (7.3, 24.5)                  | 13.9 (11.4, 16.4) | 18.1 (9.4, 26.9) | 13.9 (4.3, 23.4)  | 6.0 (0.0, 12.0)                            | 1.6 (0.8, 2.3)    | 3.1 (0.0, 6.8)   | 2.6 (2.0, 3.1)   | 11.1 (3.0, 19.2)              | 7.6 (5.5, 9.6)    | 9.6 (3.2, 16.0)   | 7.8 (0.5, 15.1)   |
| Belize                   | –                                 | 4.0 (3.3, 4.8)    | 2.5 (0.0, 5.3)   | 2.0 (1.5, 2.6)    | 1.6 (0.0, 4.9)                             | 1.8 (1.2, 2.4)    | 0.8 (0.0, 2.5)   | –                | 3.6 (0.0, 8.6)                | 4.7 (3.1, 6.4)    | 4.6 (0.2, 9.1)    | 2.4 (0.0, 6.7)    |
| Bolivia                  | 12.9 (8.4, 17.3)                  | 10.7 (9.1, 12.2)  | 8.6 (5.2, 11.9)  | 14.3 (10.0, 18.6) | 6.5 (3.3, 9.7)                             | 7.5 (5.9, 9.1)    | 4.8 (1.5, 8.0)   | 5.0 (1.5, 8.6)   | 15.5 (11.7, 19.2)             | 16.6 (14.4, 18.8) | 11.9 (7.8, 16.1)  | 18.2 (12.1, 24.3) |
| Cayman                   | 15.4 (0.0, –)                     | 9.3 (6.6, –)      | 20.6 (9.4, –)    | 20.8 (5.1, –)     | 8.9 (0.0, –)                               | 4.5 (2.5, –)      | 4.6 (0.0, –)     | 7.1 (0.0, –)     | 21.7 (3.1, –)                 | 4.6 (2.6, –)      | 8.6 (1.0, –)      | 9.8 (0.0, –)      |

|                                     |                        |                        |                        |                        |                       |                       |                       |                       |                         |                        |                        |                        |
|-------------------------------------|------------------------|------------------------|------------------------|------------------------|-----------------------|-----------------------|-----------------------|-----------------------|-------------------------|------------------------|------------------------|------------------------|
|                                     | 30.9)                  | 12.1)                  | 31.8)                  | 36.6)                  | 21.9)                 | 6.5)                  | 9.9)                  | 17.2)                 | 40.2)                   | 6.6)                   | 16.2)                  | 21.0)                  |
| Bahamas                             | 9.8 (1.5, 18.2)        | 15.0 (12.1, 17.9)      | 19.9 (12.3, 27.4)      | 15.0 (3.9, 26.1)       | 3.6 (0.0, 8.3)        | 4.9 (3.4, 6.3)        | 2.9 (0.0, 5.7)        | 1.2 (0.0, 3.8)        | 12.7 (2.2, 23.2)        | 8.9 (7.2, 10.7)        | 7.1 (2.4, 11.8)        | 4.1 (0.0, 10.6)        |
| Costa Rica                          | 7.5 (3.6, 11.4)        | 10.0 (8.3, 11.8)       | 6.7 (4.1, 9.3)         | 11.9 (4.2, 19.7)       | 1.8 (0.0, 4.4)        | 2.2 (1.4, 2.9)        | 2.3 (1.2, 3.4)        | 0.7 (0.0, 2.2)        | 2.9 (0.0, 7.2)          | 6.0(4.5, 7.4)          | 3.4 (1.1, 5.8)         | 4.5 (0.0, 9.0)         |
| Curaçao                             | 14.4 (6.9, 22.0)       | 10.6 (7.7, 13.5)       | 18.0 (8.7, 27.4)       | 15.8 (4.7, 26.9)       | 11.5 (0.0, 24.4)      | 2.4 (1.2, 3.7)        | 5.6 (0.1, 11.1)       | –                     | 2.2 (0.0, 6.7)          | 6.6 (4.4, 8.8)         | 6.7 (0.3, 13.0)        | 8.5 (0.8, 16.2)        |
| Ecuador                             | 12.6 (9.3, 15.9)       | 10.4 (8.0, 12.7)       | 10.9 (7.3, 14.4)       | 13.9 (9.2, 18.6)       | 1.2 (0.9, 1.5)        | 4.9 (3.6, 6.3)        | 3.3 (0.0, 6.7)        | 7.0(3.9, 10.0)        | 10.2 (5.5, 14.9)        | 7.9 (6.2, 9.5)         | 7.1 (3.6, 10.7)        | 9.5 (6.0, 13.1)        |
| El Salvador                         | 3.5 (0.4, 6.7)         | 5.0 (3.5, 6.4)         | 5.4 (1.5, 9.4)         | 8.3 (0.0, 17.4)        | 5.9 (0.0, 13.6)       | 3.5 (2.2, 4.9)        | 1.9 (0.0, 4.0)        | 4.6 (0.0, 10.2)       | 6.6 (1.8, 11.5)         | 5.2 (3.9, 6.6)         | 2.6 (0.0, 5.4)         | 10.1 (1.2, 19.1)       |
| Guatemala                           | 2.7 (0.0, 6.3)         | 4.3 (3.0, 5.6)         | 5.6 (2.2, 9.0)         | 3.1 (0.3, 6.0)         | 4.3 (0.0, 10.7)       | 2.6 (1.0, 4.1)        | 0.8 (0.2, 1.4)        | 2.6 (0.0, 5.9)        | 5.2 (0.0, 11.2)         | 5.8 (4.4, 7.3)         | 5.9 (1.7, 10.1)        | 1.2 (0.3, 2.1)         |
| Guyana                              | 3.3 (0.0, 6.6)         | 9.6 (7.2, 11.9)        | 8.6 (2.8, 14.3)        | 10.5 (4.0, 17.0)       | 6.5 (4.1, 9.0)        | 6.0 (4.3, 7.7)        | 6.9 (2.5, 11.4)       | 8.3 (4.0, 12.7)       | 5.2 (0.9, 9.6)          | 11.0 (7.9, 14.0)       | 12.7 (7.0, 18.4)       | 12.4 (5.9, 18.9)       |
| Honduras                            | 5.3 (0.0, 11.7)        | 7.7 (6.6, 8.8)         | 6.4 (3.1, 9.6)         | 7.4 (2.8, 12.0)        | 2.9 (0.0, 6.8)        | 5.5 (3.5, 7.5)        | 4.6 (1.9, 7.2)        | 2.7 (0.0, 7.1)        | 64.7 (54.2, 75.3)       | 58.7 (54.2, 63.2)      | 52.7 (41.4, 64.0)      | 62.5 (48.1, 76.9)      |
| Peru                                | 6.8 (2.7, 10.9)        | 4.8 (3.4, 6.3)         | 6.0 (2.6, 9.4)         | 3.1 (0.0, 6.3)         | 12.3 (7.9, 16.6)      | 6.3 (5.0, 7.6)        | 7.9 (2.8, 12.9)       | 3.5 (0.0, 7.3)        | 6.6 (3.0, 10.3)         | 7.7 (5.4, 9.9)         | 9.8 (5.0, 14.5)        | 6.4 (2.8, 10.0)        |
| Saint Kitts and Nevis               | 11.5 (3.0, 20.0)       | 12.3 (10.2, 14.5)      | 12.6 (6.2, 19.0)       | 12.0 (3.8, 20.2)       | 2.1 (0.0, 6.3)        | 3.0 (1.8, 4.2)        | 2.1 (0.0, 4.6)        | 6.4 (0.1, 12.6)       | 7.0 (0.0, 15.0)         | 7.4 (5.7, 9.1)         | 6.8 (1.8, 11.8)        | 3.6 (0.0, 8.7)         |
| Trinidad and Tobago                 | 11.4 (4.0, 18.7)       | 11.2 (9.5, 12.8)       | 8.9 (4.7, 13.0)        | 12.4 (5.3, 19.5)       | 2.5 (1.1, 3.8)        | 2.6 (1.6, 3.7)        | 3.3 (0.3, 6.3)        | –                     | 10.1 (4.6, 15.6)        | 9.7 (8.2, 11.2)        | 8.2 (5.0, 11.5)        | 10.8 (2.8, 18.8)       |
| Uruguay                             | 7.8 (3.2, 12.4)        | 12.6 (10.4, 14.8)      | 16.2 (10.5, 21.8)      | 10.9 (4.9, 17.0)       | 4.4 (0.6, 8.2)        | 7.4 (5.6, 9.1)        | 5.2 (2.6, 7.7)        | 4.4 (0.4, 8.4)        | 2.1 (0.0, 4.6)          | 3.5 (2.3, 4.7)         | 5.1 (1.7, 8.4)         | 1.3 (0.0, 3.2)         |
| Venezuela                           | 1.1 (0.0, 3.6)         | 6.0 (3.6, 8.4)         | 2.9 (0.0, 5.9)         | 6.3 (0.1, 12.6)        | –                     | 2.8 (1.9, 3.6)        | 1.0 (0.0, 2.7)        | 2.8 (0.0, 7.5)        | 7.4 (0, 14.9)           | 3.6 (2.4, 4.9)         | 4.3 (0.0, 8.9)         | 3.0 (0.0, 7.2)         |
| <b>Pooled estimates</b>             | <b>8.0 (5.6, 10.5)</b> | <b>9.3 (7.6, 10.9)</b> | <b>9.0 (7.0, 11.0)</b> | <b>9.6 (6.8, 12.3)</b> | <b>4.6 (3.0, 6.2)</b> | <b>4.1 (3.2, 4.9)</b> | <b>3.0 (2.1, 3.9)</b> | <b>3.2 (2.2, 4.2)</b> | <b>10.1 (6.4, 13.7)</b> | <b>9.7 (7.2, 12.1)</b> | <b>8.1 (5.8, 10.4)</b> | <b>7.6 (5.1, 10.1)</b> |
| <b>I<sup>2</sup> (%)</b>            | <b>81.4</b>            | <b>94.4</b>            | <b>76.1</b>            | <b>87.2</b>            | <b>86.7</b>           | <b>90.0</b>           | <b>68.3</b>           | <b>59.4</b>           | <b>90.4</b>             | <b>97.6</b>            | <b>82.5</b>            | <b>88.7</b>            |
| <b>Eastern Mediterranean Region</b> |                        |                        |                        |                        |                       |                       |                       |                       |                         |                        |                        |                        |
| Afghanistan                         | 12.8 (4.5, 21.1)       | 4.3 (2.4, 6.1)         | 10.0 (5.7, 14.4)       | 3.4 (0.0, 8.3)         | 1.1 (0.0, 3.8)        | 5.3 (2.6, 7.9)        | 6.4 (1.9, 11.0)       | 2.5 (0.0, 5.2)        | 11.8 (5.4, 18.1)        | 12.4 (7.0, 17.7)       | 10.5 (3.4, 17.6)       | 6.6 (0.0, 19.4)        |
| Djibouti                            | 8.3 (0.0, 20.9)        | 5.8 (4.2, 7.4)         | 4.4 (0.0, 9.1)         | 4.1 (0.0, 12.7)        | 17.7 (1.4, 34.0)      | 13.1 (10.7, 15.6)     | 12.0(7.3, 16.7)       | 10.4 (0.0, 21.7)      | 5.3 (0.0, 12.5)         | 12.1 (8.7, 15.4)       | 13.2 (5.0, 21.4)       | 8.3 (0.0, 19.4)        |
| Egypt                               | 11.4 (3.7, 19.0)       | 12.8 (9.6, 16.0)       | 11.1 (5.8, 16.3)       | 13.8 (4.4, 23.2)       | 11.0 (5.0, 17.1)      | 10.1 (6.5, 13.7)      | 9.7 (4.2, 15.2)       | –                     | 1.7 (0.0, 3.7)          | 8.1 (4.9, 11.3)        | 9.3 (4.5, 14.1)        | 4.3 (0.0, 9.0)         |
| Iraq                                | 13.2 (4.1, 21.1)       | 6.7 (4.7, 8.7)         | 11.2 (7.8, 14.6)       | 4.4 (0.0, 8.8)         | 8.8 (0.9, 16.7)       | 8.0 (5.8, 10.2)       | 6.9 (2.4, 11.4)       | 8.3 (0.5, 16.1)       | 3.3 (0.0, 8.2)          | 3.9 (2.8, 5.0)         | 4.8 (0.6, 9.0)         | 5.9 (0.0, 11.1)        |

|                              |      |                       |                       |                       |                       |                       |                       |                       |                       |                       |                        |                       |                       |
|------------------------------|------|-----------------------|-----------------------|-----------------------|-----------------------|-----------------------|-----------------------|-----------------------|-----------------------|-----------------------|------------------------|-----------------------|-----------------------|
|                              |      | 22.4)                 | 8.7)                  | 14.6)                 | 11.3)                 | 16.8)                 | 10.2)                 | 11.4)                 | 16.2)                 |                       | 5.1)                   | 9.0)                  | 12.9)                 |
| Jordan                       |      | 2.4 (0.0, 8.4)        | 6.1 (4.1, 8.0)        | 11.6 (4.6, 18.6)      | 3.4 (0, 8.4)          | 5.0 (0.1, 9.8)        | 5.0 (2.2, 7.8)        | 16.2 (8.3, 24.1)      | 9.7 (0.0, 21.4)       | 5.0(0.0, 12.1)        | 9.6 (6.8, 12.3)        | 11.9 (5.2, 18.5)      | 7.6 (0.0, 15.6)       |
| Kuwait                       |      | 14 (7.9, 20.0)        | 9.7 (7.5, 11.9)       | 8.7 (4.0, 13.3)       | 7.2 (1.3, 13.1)       | 8.2 (0.4, 16.0)       | 5.4 (3.7, 7.1)        | 5.9 (3.6, 8.2)        | 6.8 (1.8, 11.9)       | 7.6 (1.9, 13.3)       | 6.3 (4.1, 8.6)         | 7.4 (4.8, 10.1)       | 6.4 (2.4, 10.5)       |
| Lebanon                      |      | 6.8 (0.0, 18.2)       | 4.9 (3.8, 6.1)        | 7.4 (2.9, 11.9)       | 4.0 (0.0, 11.3)       | 1.4 (1.0, 1.8)        | 2.4 (0.3, 4.4)        | 3.5 (0.0, 7.5)        | 1.1 (0.0, 3.3)        | –                     | 1.4 (0.5, 2.4)         | 3.4 (0.0, 6.8)        | 5.0 (0.0, 11.9)       |
| Libya                        |      | 10.0 (7.3, 12.7)      | 7.6 (5.1, 10.1)       | 7.7 (2.6, 12.8)       | 5.2 (0.2, 10.2)       | 8.0 (1.0, 14.9)       | 6.2 (4.4, 8.1)        | 8.6 (4.7, 12.4)       | 7.7 (2.9, 12.5)       | 7.4 (1.5, 13.4)       | 7.0 (5.4, 8.6)         | 8.7 (4.2, 13.2)       | 5.2 (0.0, 11.1)       |
| Morocco                      |      | 4.0 (0.0, 8.1)        | 3.5 (2.4, 4.6)        | 1.9 (0.0, 4.5)        | 6.0 (0.0, 12.7)       | 8.9 (4.0, 13.7)       | 5.0 (3.8, 6.2)        | 3.6 (1.3, 6.0)        | 9.8 (4.4, 15.2)       | 11.4 (6.2, 16.5)      | 7.4 (5.7, 9.0)         | 5.7 (2.1, 9.3)        | 6.6 (1.9, 11.3)       |
| UNRWA                        |      | 5.4 (2.8, 8.0)        | 6.5 (5.1, 7.9)        | 6.7 (4.4, 8.9)        | 4.9 (2.0, 7.8)        | 2.8 (1.0, 4.7)        | 4.9 (4.0, 5.9)        | 4.2 (2.2, 6.1)        | 2.8 (0.6, 4.9)        | 6.0 (3.2, 8.9)        | 6.0 (4.4, 7.6)         | 3.3 (1.5, 5.2)        | 1.5 (0.3, 2.8)        |
| Oman                         |      | 7.4 (0.0, 15.2)       | 8.1 (5.8, 10.4)       | 5.7 (1.5, 10.0)       | 6.6 (0.9, 12.2)       | 8.7 (7.4, 9.9)        | 9.4 (6.8, 11.9)       | 6.6 (2.5, 10.8)       | 3.0 (0.8, 5.3)        | 9.2 (6.7, 11.8)       | 7.1 (4.8, 9.5)         | 6.0(1.2, 10.8)        | 6.2 (0.5, 11.8)       |
| Pakistan                     |      | 2.8 (0.8, 4.9)        | 3.6 (2.6, 4.5)        | 3.8 (1.8, 5.9)        | 2.4 (0.7, 4.0)        | 3.9 (1.5, 6.2)        | 3.5 (2.3, 4.8)        | 3.1 (0.9, 5.3)        | 2.0 (0.2, 3.9)        | 8.3 (4.3, 12.4)       | 8.0 (6.0, 10.0)        | 10.3 (6.0, 14.5)      | 4.5 (1.6, 7.5)        |
| Qatar                        |      | 12.4 (0.0, 26.8)      | 17.4 (10.2, 24.5)     | 10.8 (6.3, 15.4)      | 24.4 (13.8, 35.0)     | 15.2 (5.3, 25.1)      | 14.9 (9.2, 20.6)      | 8.2 (5.4, 11.0)       | 7.0 (0.0, 14.8)       | 9.3 (0.0, 24.1)       | 16.8 (10.5, 23.1)      | 11.1 (4.6, 17.7)      | 7.6 (0.0, 16.1)       |
| Sudan                        |      | 9.4 (0.0, 18.8)       | 7.2 (4.9, 9.4)        | 5.0 (2.3, 7.7)        | 3.7 (0.0, 9.5)        | 11.4 (0.0, 26.7)      | 11.2 (8.6, 13.7)      | 9.9 (4.0, 15.8)       | 9.7 (3.4, 16.0)       | 27.6 (13.7, 41.5)     | 21.4 (16.7, 26.1)      | 12.4 (5.4, 19.5)      | 11.5 (4.4, 18.5)      |
| Syrian Republic              | Arab | 9.5 (1.5, 17.5)       | 8.0 (6.3, 9.8)        | 16.0 (9.6, 22.3)      | 14.7 (9.6, 19.8)      | 5.4 (0.0, 10.8)       | 3.4 (1.8, 5.0)        | 7.0 (3.2, 10.8)       | 2.1 (0.0, 4.6)        | 4.1 (0.0, 10.7)       | 6.4 (4.7, 8.0)         | 7.7 (2.0, 13.3)       | 7.6 (1.5, 13.6)       |
| Tunisia                      |      | 2.0 (0.0, 6.7)        | 5.6 (3.8, 7.5)        | 9.5 (0.9, 18.0)       | 7.9 (2.3, 13.5)       | 8.1 (4.5, 11.6)       | 4.1 (2.8, 5.4)        | 4.7 (0.0, 9.5)        | 7.0(0.7, 13.3)        | 3.6 (0.0, 7.6)        | 5.5 (3.4, 7.6)         | 4.9 (0.3, 9.5)        | 6.1 (0.4, 11.8)       |
| United Emirates              | Arab | 7.1 (3.4, 10.8)       | 8.4 (6.5, 10.4)       | 8.7 (5.6, 11.8)       | 4.0 (0.3, 7.7)        | 2.5 (0.2, 4.8)        | 3.0 (1.8, 4.1)        | 4.2 (1.7, 6.6)        | 2.0 (0.0, 4.1)        | 4.1 (0.8, 7.4)        | 4.0 (2.5, 5.5)         | 4.3 (1.8, 6.9)        | 5.7 (1.9, 9.4)        |
| Yemen                        |      | –                     | 7.8 (5.2, 10.4)       | 16.0 (0.0, 33.0)      | 11.0 (0.9, 21.1)      | 4.3 (0.0, 14.8)       | 14.1 (10.2, 18.0)     | 20.4 (5.0, 35.7)      | 9.2 (0.0, 19.8)       | 16.3 (1.0, 31.5)      | 21.8 (16.0, 27.5)      | 9.9 (4.1, 15.6)       | 17.7 (8.3, 27.1)      |
| <b>Pooled estimates</b>      |      | <b>7.0 (5.0, 9.0)</b> | <b>6.8 (5.8, 7.9)</b> | <b>7.8 (6.1, 9.5)</b> | <b>6.1 (4.2, 7.9)</b> | <b>5.9 (3.9, 7.9)</b> | <b>6.7 (5.4, 7.9)</b> | <b>6.4 (5.1, 7.7)</b> | <b>3.9 (2.6, 5.1)</b> | <b>6.7 (4.7, 8.6)</b> | <b>8.3 (6.6, 10.1)</b> | <b>7.1 (5.6, 8.5)</b> | <b>5.9 (4.2, 7.7)</b> |
| <b>I<sup>2</sup> (%)</b>     |      | <b>63.1</b>           | <b>84.1</b>           | <b>70.0</b>           | <b>61.6</b>           | <b>90.0</b>           | <b>88.9</b>           | <b>58.5</b>           | <b>51.8</b>           | <b>68.6</b>           | <b>92.3</b>            | <b>52.8</b>           | <b>53.7</b>           |
| <b>Southeast Asia Region</b> |      |                       |                       |                       |                       |                       |                       |                       |                       |                       |                        |                       |                       |
| Bangladesh                   |      | 1.0 (0.0, 2.5)        | 3.3 (1.2, 5.4)        | 2.4 (0.2, 4.7)        | 2.7 (0.0, 6.3)        | 0.2 (0.0, 0.7)        | 2.3 (0.1, 4.5)        | 2.3 (0.3, 4.3)        | –                     | 4.2 (0.0, 12.2)       | 5.4 (2.2, 8.7)         | 5.3 (0.0, 11.4)       | 2.3 (0.0, 5.8)        |
| India                        |      | 9.6 (5.6, 13.7)       | 5.6 (4.6, 6.6)        | 7.1 (4.1, 10.0)       | 6.6 (3.1, 10.1)       | 4.3 (0.6, 8.0)        | 3.0(2.2, 3.8)         | 5.1 (3.2, 7.0)        | 2.4 (0.6, 4.3)        | 14.3 (7.6, 20.9)      | 13.3 (11.4, 15.3)      | 11.0 (6.9, 15.0)      | 12.3 (8.7, 15.9)      |
| Indonesia                    |      | 2.0 (0.5, 3.5)        | 2.4 (1.9, 2.8)        | 2.0 (0.9, 3.2)        | 2.7 (0.9, 4.4)        | 1.8 (0.2, 3.3)        | 2.2 (1.6, 2.7)        | 1.6 (0.6, 2.7)        | 1.7 (0.4, 3.1)        | 4.0 (1.7, 6.3)        | 3.8 (3.0, 4.5)         | 4.1 (2.4, 5.9)        | 1.6 (0.3, 3.0)        |

|                               |                        |                        |                        |                        |                       |                        |                        |                       |                         |                         |                         |                        |
|-------------------------------|------------------------|------------------------|------------------------|------------------------|-----------------------|------------------------|------------------------|-----------------------|-------------------------|-------------------------|-------------------------|------------------------|
| Thailand                      | 14.9 (11.1, 18.8)      | 14.4 (11.5, 17.3)      | 12.7 (8.7, 16.7)       | 25.7 (16.1, 35.2)      | 6.3 (2.1, 10.5)       | 6.4 (5.1, 7.7)         | 4.7 (1.5, 8.0)         | 9.2 (5.1, 13.2)       | 13.8 (7.2, 20.4)        | 13.8 (11.5, 16.1)       | 14.3 (9.9, 18.8)        | 15.6 (7.5, 23.6)       |
| Timor-Leste                   | 18.5 (12.2, 24.8)      | 20.1 (17.2, 23.0)      | 22.4 (17.6, 27.3)      | 15.2 (4.5, 26.0)       | 31.9 (21.3, 42.6)     | 25.7 (22.3, 29.2)      | 28.3 (21.4, 35.2)      | 27.7 (12.7, 42.7)     | 17.9 (10.4, 25.4)       | 17.2 (14.5, 19.9)       | 18.1 (10.6, 25.7)       | 13.0 (5.6, 20.5)       |
| <b>Pooled estimates</b>       | <b>8.5 (3.6, 13.4)</b> | <b>8.9 (4.6, 13.3)</b> | <b>8.9 (3.5, 14.4)</b> | <b>8.1 (3.3, 13.0)</b> | <b>5.0 (1.6, 8.4)</b> | <b>7.4 (3.9, 10.9)</b> | <b>6.7 (2.8, 10.6)</b> | <b>5.4 (1.5, 9.2)</b> | <b>10.4 (4.5, 16.3)</b> | <b>10.7 (4.7, 16.6)</b> | <b>10.1 (4.9, 15.4)</b> | <b>8.1 (2.8, 13.4)</b> |
| <b>I<sup>2</sup> (%)</b>      | <b>95.1</b>            | <b>98.2</b>            | <b>95.6</b>            | <b>86.2</b>            | <b>92.0</b>           | <b>98.0</b>            | <b>93.8</b>            | <b>86.8</b>           | <b>83.3</b>             | <b>98.0</b>             | <b>87.9</b>             | <b>91.3</b>            |
| <b>Western Pacific Region</b> |                        |                        |                        |                        |                       |                        |                        |                       |                         |                         |                         |                        |
| Brunei                        |                        | 3.6 (2.6, 4.6)         | 5.2 (1.7, 8.6)         | 2.1 (0.0, 6.3)         | 1.0(0.0, 3.1)         | 3.0(1.7, 4.4)          | 2.4 (0.0, 4.8)         | 0.8 (0.0, 2.6)        | 8.2 (1.9, 14.5)         | 9.7 (7.9, 11.6)         | 14.2 (8.4, 20.0)        | 2.5 (0.0, 6.0)         |
| Darussalam                    | 1.5 (0.0, 4.4)         |                        |                        |                        |                       |                        |                        |                       |                         |                         |                         |                        |
| Cambodia                      | –                      | 2.0 (1.2, 2.8)         | 3.2 (1.1, 5.3)         | –                      | 4.4 (0.3, 8.4)        | 3.0 (2.1, 3.9)         | 4.1 (0.5, 7.7)         | 2.2 (0.0, 6.9)        | 0.5 (0.0, 1.7)          | 2.8 (2.1, 3.6)          | 0.9 (0.0, 2.3)          | –                      |
| China                         | 5.4 (2.9, 7.9)         | 4.4 (3.6, 5.2)         | 4.6 (2.6, 6.5)         | 3.3 (1.3, 5.3)         | 2.5 (0.3, 4.7)        | 2.6 (2.1, 3.2)         | 3.3 (1.3, 5.4)         | 4.5 (2.0, 7.0)        | 10.7 (6.3, 15.1)        | 10.9 (9.6, 12.1)        | 7.5 (5.5, 9.5)          | 11.6 (8.1, 15.1)       |
| Cook                          | 21.0 (14.1, 27.9)      | 4.9 (1.6, 8.1)         | 24.4 (10.5, 38.3)      | –                      | 15.0 (0.0, 38.7)      | 3.3 (0.3, 6.2)         | 3.2 (0.0, 12.2)        | 9.4 (0.0, 23.2)       | 14.8 (0.0, 45.3)        | 6.7 (3.2, 10.2)         | 15.6 (1.1, 30.2)        | 14.8 (0.0, 31.9)       |
| Kiribati                      | 11.8 (5.7, 17.8)       | 21.4 (15.5, 27.4)      | 18.1 (10.7, 25.5)      | 27.0 (17.1, 36.9)      | 22.4 (12.5, 32.2)     | 15.7 (12.4, 19.0)      | 16.2 (8.7, 23.7)       | 23.7 (12.9, 34.4)     | 13.2 (2.1, 24.2)        | 15.1 (12.4, 17.8)       | 18.4 (11.4, 25.4)       | 20.6 (11.5, 29.8)      |
| Laos                          | 1.2 (0.0, 4.0)         | 2.0 (0.8, 3.3)         | 1.9 (0.0, 4.1)         | –                      | 5.1 (0.6, 9.6)        | 3.7 (1.9, 5.6)         | 5.4 (0.0, 10.8)        | 1.2 (0.0, 3.7)        | 8.9 (0.5, 17.3)         | 8.5 (5.7, 11.2)         | 9.0 (5.2, 12.7)         | 6.8 (2.2, 11.3)        |
| Malaysia                      | 7.0 (3.8, 10.3)        | 4.8 (4.2, 5.5)         | 5.6 (4.3, 6.9)         | 4.0 (2.4, 5.6)         | 9.6 (5.8, 13.4)       | 6.0 (5.3, 6.6)         | 3.8 (2.6, 4.9)         | 5.5 (3.8, 7.3)        | 15.0 (10.9, 19.1)       | 13.6 (12.5, 14.7)       | 12.7 (10.6, 14.9)       | 12.6 (9.7, 15.4)       |
| Mongolia                      | 3.8 (0.2, 7.4)         | 7 (6, 8)               | 5.6 (2.8, 8.5)         | 10.1 (5.3, 14.9)       | 13.0 (7.0, 19.0)      | 10.5 (8.8, 12.3)       | 8.8 (4.6, 12.9)        | 8.8 (4.5, 13.1)       | 3.6 (0.1, 7.0)          | 2.9 (2.1, 3.8)          | 3.9 (1.5, 6.4)          | 2.1 (0.0, 4.2)         |
| Philippines                   | 2.0 (0.2, 3.7)         | 4.1 (3.2, 5.0)         | 6.7 (4.4, 9.1)         | 6.0 (3.6, 8.5)         | 1.5 (0.1, 2.9)        | 3.6 (2.8, 4.3)         | 3.4 (2.0, 4.8)         | 3.1 (1.0, 5.2)        | 5.1 (2.5, 7.8)          | 5.1 (4.4, 5.8)          | 4.5 (2.6, 6.5)          | 4.1 (1.7, 6.6)         |
| Samoa                         | 8.3 (0.0, 17.4)        | 12.7 (10.1, 15.3)      | 16.2 (9.4, 22.9)       | 10.1 (4.5, 15.6)       | 15.0 (1.7, 28.3)      | 15.8 (13.3, 18.3)      | 15.6 (9.2, 21.9)       | 8.6 (0.1, 17.1)       | 15.8 (6.8, 24.9)        | 17.6 (14.2, 21.0)       | 16.3 (9.0, 23.5)        | 12.7 (3.6, 21.7)       |
| Solomon                       | 7.3 (0.0, 17.0)        | 8.5 (6.5, 10.6)        | 10.8 (4.6, 16.9)       | 5.9 (0.0, 11.9)        | 8.4 (0.0, 18.6)       | 9.4 (6.8, 12.0)        | 6.1 (2.6, 9.7)         | 4.1 (0.4, 7.9)        | 12.8 (5.6, 19.9)        | 10 (5.3, 14.8)          | 13.5 (5.8, 21.1)        | 5.2 (0.0, 13.8)        |
| Tonga                         | 8 (1.5, 14.0)          | 11.7 (9.7, 13.7)       | 10.0 (5.3, 14.7)       | 7.8 (2.7, 12.8)        | 2.0 (0.0, 4.8)        | 7.3 (5.7, 8.8)         | 4.8 (2.2, 7.3)         | 7.4 (1.0, 13.8)       | 19.3 (13.2, 25.3)       | 18.2 (15.9, 20.5)       | 15.5 (10.5, 20.5)       | 9.8 (4.0, 15.7)        |
| Tuvalu                        | 54.2 (29.0, 79.3)      | 37.1 (32.1, 42.1)      | 35.0 (20.0, 49.9)      | 43.2 (23.2, 63.2)      | 36.7 (11.9, 61.5)     | 17.1 (13.1, 21.2)      | 15.2 (4.3, 26.1)       | 10.9 (0.0, 23.4)      | 4.7 (0.0, 14.5)         | 16.2 (12.4, 20.0)       | 21.2 (8.1, 34.4)        | 21.3 (5.0, 37.6)       |
| Vanuatu                       | 10.8 (0.0, 29.7)       | 5.1 (3.3, 6.9)         | 10.9 (0.0, 23.4)       | 1.5 (1.2, 1.7)         | 7.1 (0.0, 27.5)       | 7.9 (4.1, 11.6)        | 6.9 (0.0, 15.5)        | 3.6 (3.0, 4.2)        | 21.5 (0.0, 43.1)        | 17.4 (14.2, 20.6)       | 11.8 (2.3, 21.2)        | 22.1 (0.4, 43.8)       |
| Vietnam                       | 1.2 (0.8, 1.6)         | 7.2 (5.1, 9.3)         | 6.1 (1.6, 10.6)        | 12.6 (2.9, 22.3)       | 1.3 (0.0, 4.3)        | 2.2 (1.0, 3.4)         | 3.4 (0.0, 7.2)         | 1.0 (0.7, 1.2)        | 7.7 (1.1, 14.3)         | 9.0 (6.2, 11.8)         | 4.7 (3.6, 5.8)          | 8.0 (3.0, 13.0)        |
| Wallis and                    | –                      | 13.2 (10.1, 13.2)      | 12.2 (3.6, 12.2)       | 6.9 (0.0, 6.9)         | 9.6 (0.0, 9.6)        | 8.6 (6.2, 8.6)         | 6.6 (1.4, 6.6)         | –                     | 6.6 (0.0, 6.6)          | 8.6 (6.3, 8.6)          | 7.3 (1.3, 7.3)          | 2.4 (0.0, 2.4)         |

|                          |                       |                        |                       |                       |                       |                       |                       |                       |                        |                         |                        |                        |
|--------------------------|-----------------------|------------------------|-----------------------|-----------------------|-----------------------|-----------------------|-----------------------|-----------------------|------------------------|-------------------------|------------------------|------------------------|
| Futuna                   |                       | 16.3)                  | 20.7)                 | 15.8)                 | 20.7)                 | 11.0)                 | 11.7)                 |                       | 20.4)                  | 10.9)                   | 13.4)                  | 7.6)                   |
| <b>Pooled estimates</b>  | <b>5.6 (3.5, 7.7)</b> | <b>8.3 (6.6, 10.0)</b> | <b>7.7 (5.7, 9.6)</b> | <b>6.8 (4.5, 9.1)</b> | <b>5.4 (3.3, 7.4)</b> | <b>7.1 (5.5, 8.6)</b> | <b>5.2 (3.9, 6.5)</b> | <b>3.8 (2.5, 5.2)</b> | <b>9.5 (5.9, 13.0)</b> | <b>10.7 (8.2, 13.2)</b> | <b>9.6 (7.1, 12.2)</b> | <b>8.2 (5.4, 10.9)</b> |
| <b>I<sup>2</sup> (%)</b> | <b>86.0</b>           | <b>96.3</b>            | <b>78.8</b>           | <b>88.1</b>           | <b>77.3</b>           | <b>95.7</b>           | <b>61.1</b>           | <b>89.3</b>           | <b>89.0</b>            | <b>97.7</b>             | <b>91.4</b>            | <b>81.5</b>            |
| <b>Total</b>             |                       |                        |                       |                       |                       |                       |                       |                       |                        |                         |                        |                        |
| <b>Pooled estimates</b>  | <b>6.6 (5.4, 7.8)</b> | <b>6.7 (4.1, 9.3)</b>  | <b>6.7 (3.9, 9.6)</b> | <b>6.7 (5.3, 8.2)</b> | <b>4.9 (3.7, 6.0)</b> | <b>5.6 (3.5, 7.6)</b> | <b>4.9 (3.3, 6.5)</b> | <b>3.5 (2.5, 4.6)</b> | <b>9.0 (7.1, 10.9)</b> | <b>8.9 (6.0, 11.9)</b>  | <b>8.3 (6.5, 10.1)</b> | <b>6.7 (4.5, 8.9)</b>  |
| <b>I<sup>2</sup> (%)</b> | <b>9.4</b>            | <b>94.9</b>            | <b>94.2</b>           | <b>47.4</b>           | <b>26.0</b>           | <b>92.2</b>           | <b>80.5</b>           | <b>55.0</b>           | <b>28.3</b>            | <b>87.8</b>             | <b>55.5</b>            | <b>69.6</b>            |



**Table S7 Prevalence of daily tooth brushing across different BMI levels**

|                          | Underweight             |                          |                          | Normal                  |                          |                         | Overweight             |                          |                         | Obese                  |                          |                         |
|--------------------------|-------------------------|--------------------------|--------------------------|-------------------------|--------------------------|-------------------------|------------------------|--------------------------|-------------------------|------------------------|--------------------------|-------------------------|
|                          | 0                       | 1–3 times                | >3 times                 | 0                       | 1–3 times                | >3 times                | 0                      | 1–3 times                | >3 times                | 0                      | 1–3 times                | >3 times                |
| <b>Africa Region</b>     |                         |                          |                          |                         |                          |                         |                        |                          |                         |                        |                          |                         |
| Algeria                  | 24.5 (18.0, 31.0)       | 63.1 (54.1, 72.2)        | 12.3 (7.6, 17.1)         | 19.9 (16.8, 23.0)       | 67.5 (64.1, 70.8)        | 12.6 (10.3, 14.9)       | 15.4 (10.5, 20.4)      | 67.2 (61.4, 73.0)        | 17.4 (13.7, 21.1)       | 16.2 (10.8, 21.5)      | 68.9 (64.2, 73.7)        | 14.9 (10.6, 19.2)       |
| Ghana                    | 16.1 (10.3, 21.8)       | 54.9 (46.8, 63.1)        | 29.0 (20.8, 37.2)        | 13.1 (11.0, 15.1)       | 62.6 (59.3, 65.8)        | 24.4 (22.2, 26.6)       | 13.9 (9.6, 18.2)       | 65.9 (58.6, 73.2)        | 20.2 (14.2, 26.2)       | 10.9 (6.7, 15.0)       | 70.9 (63.6, 78.2)        | 18.2 (12.9, 23.5)       |
| Namibia                  | 17.9 (8.7, 27.1)        | 63.8 (54.9, 72.7)        | 18.3 (13.0, 23.6)        | 12.5 (9.1, 15.8)        | 67.6 (62.6, 72.5)        | 20.0 (16.2, 23.8)       | 6.6 (2.4, 10.8)        | 70.4 (62.2, 78.6)        | 23.0 (16.0, 30.0)       | 14.8 (0.0, 29.6)       | 72.3 (63.1, 81.4)        | 13.0 (5.9, 20.0)        |
| Senegal                  | 21.9 (10.0, 33.8)       | 67.2 (49.5, 85.0)        | 10.9 (5.0, 16.7)         | 9.6 (3.2, 15.9)         | 84.4 (79.5, 89.2)        | 6.1 (3.8, 8.4)          | 5.9 (0.0, 15.9)        | 83.6 (77.6, 89.6)        | 10.5 (3.1, 18.0)        | 10.2 (3.5, 16.8)       | 84.1 (74.0, 94.3)        | 5.7 (0.0, 14.2)         |
| Swaziland                | 3.6 (0.0, 8.5)          | 88.3 (79.2, 97.3)        | 8.2 (2.1, 14.2)          | 5.1 (3.2, 7.0)          | 89.7 (87.9, 91.5)        | 5.2 (3.9, 6.6)          | 4.2 (2.1, 6.4)         | 93.5 (88.9, 98.2)        | 2.2 (0.0, 5.5)          | 6.1 (0.0, 13.9)        | 90.4 (83.6, 97.1)        | 3.6 (0.0, 7.6)          |
| Uganda                   | 1.1 (0.8, 1.4)          | 76.1 (68.2, 84.0)        | 22.8 (14.9, 30.8)        | 1.6 (1.0, 2.3)          | 83.5 (81.1, 85.9)        | 14.9 (12.4, 17.4)       | 2.0 (0.0, 4.2)         | 84.7 (79.5, 89.8)        | 13.4 (7.1, 19.6)        | 0.8 (0.5, 1.0)         | 83.2 (74.0, 92.5)        | 16.0 (6.6, 25.3)        |
| <b>Pooled estimates</b>  | <b>13.5 (5.1, 22.0)</b> | <b>69.0 (58.8, 79.1)</b> | <b>16.4 (10.9, 22.0)</b> | <b>10.2 (4.3, 16.2)</b> | <b>76.0 (66.3, 85.6)</b> | <b>13.8 (7.3, 20.3)</b> | <b>7.8 (3.6, 12.0)</b> | <b>77.8 (68.4, 87.2)</b> | <b>14.3 (6.7, 21.9)</b> | <b>9.3 (2.6, 16.0)</b> | <b>78.1 (70.2, 86.0)</b> | <b>11.7 (6.2, 17.2)</b> |
| <b>I<sup>2</sup> (%)</b> | <b>95.1</b>             | <b>85.7</b>              | <b>79.5</b>              | <b>98.1</b>             | <b>98.4</b>              | <b>98.1</b>             | <b>88.2</b>            | <b>93.3</b>              | <b>93.0</b>             | <b>92.6</b>            | <b>85.0</b>              | <b>82.3</b>             |
| <b>European Region</b>   |                         |                          |                          |                         |                          |                         |                        |                          |                         |                        |                          |                         |
| Macedonia                | 7.6 (2.2, 13.0)         | 88.6 (80.2, 97.0)        | 3.8 (0.0, 9.7)           | 2.8 (1.1, 4.4)          | 91.7 (90.2, 93.3)        | 5.5 (3.8, 7.2)          | 2.5 (0.5, 4.4)         | 93.5 (90.4, 96.6)        | 4.0 (0.7, 7.4)          | 1.5 (0.0, 4.7)         | 90.1 (82.1, 98.0)        | 8.4 (0.9, 15.9)         |
| <b>Pooled estimates</b>  | –                       | –                        | –                        | –                       | –                        | –                       | –                      | –                        | –                       | –                      | –                        | –                       |
| <b>I<sup>2</sup> (%)</b> | –                       | –                        | –                        | –                       | –                        | –                       | –                      | –                        | –                       | –                      | –                        | –                       |
| <b>America Region</b>    |                         |                          |                          |                         |                          |                         |                        |                          |                         |                        |                          |                         |
| Argentina                | 8.2 (3.6, 12.9)         | 79.2 (72.5, 85.9)        | 12.6 (9.4, 15.8)         | 6.7 (5.7, 7.6)          | 81.6 (79.8, 83.4)        | 11.8 (10.1, 13.5)       | 9.7 (7.0, 12.5)        | 77.9 (74.0, 81.9)        | 12.3 (8.9, 15.7)        | 6.9 (4.5, 9.3)         | 81.9 (76.9, 86.8)        | 11.3 (6.3, 16.2)        |
| Bahamas                  | 8.2 (0.6, 15.7)         | 76.6 (63.7, 89.4)        | 15.3 (3.9, 26.7)         | 5.4 (3.4, 7.3)          | 84.5 (80.2, 88.8)        | 10.1 (7.1, 13.1)        | 8.2 (3.1, 13.3)        | 86.6 (78.8, 94.5)        | 5.1 (0.7, 9.5)          | 3.7 (0.0, 9.6)         | 84.4 (76.2, 92.6)        | 11.9 (3.8, 20.0)        |
| Barbados                 | 7.9 (0.2, 15.6)         | 80.3 (68.5, 92.2)        | 11.8 (4.2, 19.3)         | 3.0 (1.8, 4.2)          | 90.5 (88.5, 92.6)        | 6.5 (4.6, 8.3)          | 4.4 (0.8, 8.0)         | 86.6 (77.8, 95.4)        | 9.0 (0.7, 17.4)         | 1.3 (0.0, 4.1)         | 95.2 (91.0, 99.5)        | 3.4 (0.3, 6.6)          |
| Belize                   | –                       | 87.1 (77.4, 96.8)        | 12.9 (3.2, 22.6)         | 2.1 (1.0, 3.3)          | 84.7 (81.4, 88.0)        | 13.1 (10.4, 15.9)       | 1.1 (0.0, 2.8)         | 81.5 (71.9, 91.1)        | 17.3 (8.1, 26.6)        | 3.0 (0.0, 6.6)         | 90.9 (83.7, 98.0)        | 6.2 (0.1, 12.3)         |
| Bolivia                  | 9.4 (3.6, 15.2)         | 83.1 (75.4, 90.8)        | 7.5 (1.9, 13.1)          | 8.4 (7.0, 9.9)          | 84.8 (83.2, 86.3)        | 6.8 (5.6, 8.0)          | 5.4 (2.8, 8.1)         | 85.6 (82.1, 89.1)        | 9.0 (5.5, 12.4)         | 5.4 (2.2, 8.6)         | 88.7 (83.9, 93.6)        | 5.9 (2.0, 9.8)          |
| Cayman                   | 15.2 (0.0, 32.3)        | 76.0 (56.0, 96.0)        | 8.9 (0.0, 21.9)          | 3.3 (1.6, 4.9)          | 92.2 (89.8, 94.7)        | 4.5 (2.6, 6.4)          | 5.6 (0.0, 12)          | 92.8 (85.7, 99.9)        | 1.6 (0.0, 4.9)          | 15.7 (0.8, 30.6)       | 81.2 (65.6, 96.9)        | 3.1 (0.0, 9.3)          |

|                                     |                       |                          |                         |                       |                          |                         |                       |                          |                        |                       |                          |                         |
|-------------------------------------|-----------------------|--------------------------|-------------------------|-----------------------|--------------------------|-------------------------|-----------------------|--------------------------|------------------------|-----------------------|--------------------------|-------------------------|
| Costa Rica                          | –                     | 77.4 (70.8, 84.1)        | 22.6 (15.9, 29.2)       | 1.8 (1.2, 2.3)        | 82.1 (79.7, 84.5)        | 16.1 (14.0, 18.2)       | 2.6 (0.8, 4.4)        | 80.5 (74.7, 86.3)        | 16.9 (12.3, 21.6)      | 1.4 (0.0, 3.6)        | 81.3 (76.1, 86.4)        | 17.3 (13.3, 21.4)       |
| Curaçao                             | –                     | 91.8 (86.8, 96.8)        | 8.2 (3.2, 13.2)         | 3.2 (1.9, 4.6)        | 94.1 (92.2, 96.0)        | 2.7 (1.3, 4.0)          | 5.3 (0.0, 10.6)       | 85.9 (77.3, 94.4)        | 8.8 (3.1, 14.5)        | 7.9 (0.8, 15.0)       | 85.9 (74.1, 97.7)        | 6.2 (0.0, 16.0)         |
| Ecuador                             | 4.7 (1.8, 7.6)        | 95.3 (92.4, 98.2)        | –                       | 11.1 (8.9, 13.3)      | 88.9 (86.7, 91.1)        | –                       | 11.6 (7.3, 15.9)      | 87.7 (83.4, 92.0)        | 0.7 (0.6, 0.8)         | 8.9 (4.2, 13.6)       | 91.1 (86.4, 95.8)        | –                       |
| El Salvador                         | –                     | 90.3 (85.5, 95.1)        | 9.7 (4.9, 14.5)         | 2.5 (1.5, 3.4)        | 85.8 (83.8, 87.8)        | 11.8 (9.7, 13.8)        | 1.5 (0.0, 4.0)        | 89.2 (84.0, 94.4)        | 9.3 (4.0, 14.6)        | 8.3 (1.3, 15.3)       | 77.1 (65.2, 89.1)        | 14.6 (5.4, 23.7)        |
| Guatemala                           | 4.5 (0.0, 10.9)       | 84.2 (68.8, 99.7)        | 11.2 (0.7, 21.8)        | 5.4 (3.4, 7.4)        | 75.8 (72.1, 79.4)        | 18.8 (15.1, 22.5)       | 12.6 (4.7, 20.6)      | 74.0 (67.1, 80.8)        | 13.4 (8.5, 18.3)       | 0.8 (0.2, 1.3)        | 76.3 (67.0, 85.7)        | 22.9 (13.2, 32.6)       |
| Guyana                              | 2.2 (1.4, 3.0)        | 95.2 (93.4, 97.0)        | 2.6 (1.6, 3.6)          | 4.7 (3.2, 6.1)        | 87.8 (84.8, 90.7)        | 7.5 (5.3, 9.8)          | 1.8 (0.0, 4.1)        | 90.7 (86.6, 94.8)        | 7.5 (5.1, 9.9)         | 3.6 (0.0, 7.3)        | 85.6 (81.6, 89.5)        | 10.8 (4.3, 17.3)        |
| Honduras                            | 2.6 (1.7, 3.4)        | 82.2 (72.5, 91.9)        | 15.3 (5.8, 24.8)        | 4.1 (2.8, 5.3)        | 81.1 (78.4, 83.8)        | 14.8 (12.4, 17.3)       | 5.9 (1.8, 10.1)       | 75.2 (69.0, 81.5)        | 18.8 (12.1, 25.5)      | 1.2 (0.0, 4.0)        | 83.8 (73.7, 93.8)        | 15.0 (6.6, 23.4)        |
| Peru                                | 4.5 (1.1, 7.9)        | 80.5 (75.4, 85.7)        | 15.0 (11.2, 18.7)       | 3.8 (2.8, 4.9)        | 86.9 (84.9, 88.9)        | 9.3 (7.4, 11.1)         | 6.2 (2.9, 9.5)        | 87.3 (83.4, 91.1)        | 6.5 (3.7, 9.4)         | 3.3 (0.0, 6.9)        | 90.4 (85.6, 95.2)        | 6.3 (3.0, 9.6)          |
| Saint Kitts and Nevis               | 1.6 (0.0, 4.7)        | 94.1 (88.1, 100.0)       | 4.4 (0, 9.4)            | 4.7 (3.2, 6.1)        | 86.0 (83.8, 88.3)        | 9.3 (7.4, 11.2)         | 1.3 (0.0, 3.2)        | 88.6 (82.7, 94.6)        | 10.0 (4.3, 15.7)       | 1.2 (0.0, 3.5)        | 87.7 (79.7, 95.7)        | 11.2 (3.4, 18.9)        |
| Trinidad and Tobago                 | 2.7 (0.0, 6.7)        | 94.0 (91.0, 97.0)        | 3.3 (0.0, 7.0)          | 3.6 (2.1, 5.1)        | 92.6 (90.8, 94.3)        | 3.8 (2.6, 5)            | 6.0 (2.9, 9.0)        | 90.9 (86.8, 95.1)        | 3.1 (0.1, 6.0)         | 1.0 (0.0, 3.2)        | 96.7 (93.1, 100.0)       | 2.3 (0.0, 5.1)          |
| Uruguay                             | 3.3 (0.0, 6.9)        | 75.1 (64.2, 86.0)        | 21.6 (12.2, 31.0)       | 2.4 (1.6, 3.2)        | 77.8 (75.9, 79.7)        | 19.8 (18.0, 21.6)       | 3.1 (0.8, 5.4)        | 75.2 (69.1, 81.2)        | 21.7 (16.0, 27.4)      | 3.0 (0.0, 6.4)        | 74.6 (66.4, 82.9)        | 22.4 (14.1, 30.7)       |
| Venezuela                           | 2.4 (2.0, 2.8)        | 67.9 (58.5, 77.4)        | 29.7 (20.3, 39.0)       | 1.9 (1.1, 2.7)        | 83.3 (79.8, 86.8)        | 14.8 (11.4, 18.2)       | 1.3 (0.0, 3.5)        | 85.8 (81.0, 90.6)        | 12.9 (7.9, 17.8)       | 0.9 (0.6, 1.2)        | 82.4 (69.8, 95.1)        | 16.7 (3.8, 29.6)        |
| <b>Pooled estimates</b>             | <b>3.0 (2.3, 3.7)</b> | <b>85.3 (81.6, 88.9)</b> | <b>11.9 (8.3, 15.5)</b> | <b>4.2 (3.3, 5.2)</b> | <b>85.7 (83.3, 88.0)</b> | <b>10.6 (8.1, 13.1)</b> | <b>4.5 (3.1, 5.9)</b> | <b>84.7 (82.1, 87.3)</b> | <b>9.8 (6.8, 12.9)</b> | <b>2.5 (1.6, 3.3)</b> | <b>86.2 (83.1, 89.3)</b> | <b>10.1 (7.1, 13.1)</b> |
| <b>I<sup>2</sup> (%)</b>            | <b>44.3</b>           | <b>86.7</b>              | <b>89.9</b>             | <b>92.1</b>           | <b>94.8</b>              | <b>96.6</b>             | <b>79.0</b>           | <b>76.3</b>              | <b>95.0</b>            | <b>72.3</b>           | <b>77.2</b>              | <b>81.1</b>             |
| <b>Eastern Mediterranean Region</b> |                       |                          |                         |                       |                          |                         |                       |                          |                        |                       |                          |                         |
| Afghanistan                         | 16.1 (8.3, 23.9)      | 59.4 (44.7, 74.1)        | 24.5 (7.6, 41.4)        | 24.3 (18.7, 30.0)     | 62.7 (59.3, 66.2)        | 13.0 (8.8, 17.1)        | 21.7 (10.5, 33.0)     | 67.1 (57.1, 77.1)        | 11.2 (6.1, 16.2)       | 22.4 (2.6, 42.3)      | 61.0 (44.3, 77.6)        | 16.6 (7.0, 26.2)        |
| Djibouti                            | 13.2 (4.7, 21.6)      | 60.4 (47.7, 73.1)        | 26.5 (11.1, 41.8)       | 10.9 (8.1, 13.7)      | 57.0 (53.8, 60.2)        | 32.1 (29.0, 35.2)       | 9.6 (2.1, 17.2)       | 52.8 (40.9, 64.7)        | 37.6 (25.5, 49.6)      | 4.4 (0.7, 8.1)        | 62.0 (46.6, 77.5)        | 33.6 (17.4, 49.7)       |
| Egypt                               | 42.1 (34.4, 49.7)     | 46.2 (37.0, 55.4)        | 11.7 (6.9, 16.5)        | 39.8 (34.0, 45.7)     | 51.9 (45.7, 58.2)        | 8.2 (5.2, 11.2)         | 34.0 (27.4, 40.5)     | 56.6 (49.5, 63.8)        | 9.4 (5.1, 13.8)        | 35.8 (25.6, 46.1)     | 55.6 (44.7, 66.5)        | 8.5 (4.2, 12.9)         |
| Iraq                                | 23.1 (10.4, 35.9)     | 60.6 (48.8, 72.5)        | 16.3 (7.7, 24.8)        | 20.5 (17.6, 23.4)     | 69.0 (65.2, 72.8)        | 10.5 (8.2, 12.8)        | 26.5 (18.1, 34.9)     | 64.1 (55.5, 72.7)        | 9.4 (4.3, 14.5)        | 23.5 (13.7, 33.4)     | 69.2 (58.2, 80.1)        | 7.3 (2.5, 12.1)         |
| Jordan                              | 23.5 (11.4, 35.7)     | 65.7 (49.7, 81.8)        | 10.7 (0.0, 21.5)        | 19.9 (16.8, 23.1)     | 73.4 (69.7, 77.1)        | 6.6 (4.6, 8.7)          | 27.6 (15.9, 39.3)     | 65.0 (52.7, 77.4)        | 7.3 (1.8, 12.9)        | 32.0 (17.2, 46.7)     | 60.0 (48.8, 71.1)        | 8.1 (1.0, 15.1)         |

|                              |                          |                          |                         |                          |                          |                         |                          |                          |                        |                          |                          |                        |
|------------------------------|--------------------------|--------------------------|-------------------------|--------------------------|--------------------------|-------------------------|--------------------------|--------------------------|------------------------|--------------------------|--------------------------|------------------------|
| Kuwait                       | 13.9 (4.6, 23.2)         | 83.9 (73.8, 94.0)        | 2.2 (0, 5.3)            | 14.1 (9.4, 18.7)         | 80.0 (74.8, 85.3)        | 5.9 (4.2, 7.6)          | 15.8 (9.7, 21.9)         | 78.9 (72.8, 85.1)        | 5.3 (1.2, 9.4)         | 16.1 (5.3, 26.9)         | 76.7 (66.2, 87.2)        | 7.2 (6.1, 8.3)         |
| Lebanon                      | 10.9 (0.0, 23.3)         | 77.4 (59.9, 94.9)        | 11.8 (0.0, 26.1)        | 7.7 (6.0, 9.5)           | 86.6 (84.1, 89.1)        | 5.7 (3.5, 7.9)          | 12.6 (7.9, 17.3)         | 82.2 (76.0, 88.4)        | 5.2 (1.2, 9.2)         | 16.8 (9.1, 24.5)         | 73.2 (53.6, 92.8)        | 10.0 (0.0, 23.9)       |
| Morocco                      | 31.2 (20, 42.3)          | 57.1 (46.7, 67.4)        | 11.8 (6.0, 17.6)        | 32.1 (26.6, 37.6)        | 54.1 (49.3, 58.8)        | 13.8 (11.2, 16.5)       | 23.1 (16.1, 30.1)        | 64.1 (56.6, 71.6)        | 12.8 (9.1, 16.4)       | 34.4 (20.8, 48.1)        | 53.8 (39.7, 68.0)        | 11.7 (5.5, 18.0)       |
| Oman                         | 17.6 (12.6, 22.5)        | 72.7 (67.2, 78.2)        | 9.8 (7.1, 12.4)         | 15.7 (10.8, 20.6)        | 77.2 (72.3, 82.0)        | 7.1 (5.6, 8.6)          | 13.9 (8.2, 19.5)         | 75.5 (67.3, 83.8)        | 10.6 (5.3, 16.0)       | 9.4 (2.3, 16.6)          | 82.8 (73.4, 92.2)        | 7.8 (4.4, 11.1)        |
| Pakistan                     | 16.0 (10.7, 21.2)        | 78.4 (73.3, 83.4)        | 5.7 (3.0, 8.3)          | 16.5 (12.3, 20.8)        | 80.1 (76.0, 84.3)        | 3.3 (1.7, 4.9)          | 15.1 (10.9, 19.4)        | 78.9 (74.8, 83.0)        | 6.0 (1.3, 10.6)        | 17.9 (11.4, 24.3)        | 78.5 (71.1, 86.0)        | 3.6 (0.0, 7.2)         |
| Qatar                        | 12.3 (0.0, 27.8)         | 69.5 (53.8, 85.2)        | 18.2 (15.5, 20.9)       | 22.6 (14.4, 30.8)        | 61.1 (54.1, 68.0)        | 16.4 (12.1, 20.6)       | 14.9 (6.0, 23.7)         | 72.3 (62.8, 81.8)        | 12.8 (4.8, 20.9)       | 15.2 (4.8, 25.5)         | 82.5 (72.0, 93.0)        | 2.3 (1.9, 2.8)         |
| Sudan                        | 4.3 (2.3, 6.2)           | 78.4 (70.0, 86.8)        | 17.3 (7.5, 27.2)        | 9.8 (6.9, 12.6)          | 77.7 (73.8, 81.6)        | 12.6 (9.0, 16.1)        | 13.2 (3.3, 23.2)         | 76.4 (67.4, 85.4)        | 10.3 (3.2, 17.5)       | 7.8 (0.0, 16.2)          | 82.1 (68.9, 95.3)        | 10.1 (4.4, 15.8)       |
| Syrian Arab Republic         | 34.2 (25.5, 42.9)        | 58.0 (48.7, 67.3)        | 7.8 (2.8, 12.8)         | 33.2 (30.0, 36.5)        | 62.2 (58.8, 65.5)        | 4.6 (3.5, 5.7)          | 35.5 (27.2, 43.9)        | 60.4 (52.2, 68.7)        | 4.0 (1.9, 6.2)         | 34.4 (27.6, 41.2)        | 60.3 (52.7, 68.0)        | 5.2 (1.4, 9.1)         |
| Tunisia                      | 14.1 (3.7, 24.5)         | 74.8 (62.8, 86.9)        | 11.1 (5.6, 16.6)        | 10.3 (8.6, 11.9)         | 82.4 (79.4, 85.4)        | 7.3 (5.5, 9.2)          | 18.2 (13.7, 22.6)        | 71.4 (66.1, 76.7)        | 10.4 (5.5, 15.3)       | 14.7 (4.2, 25.2)         | 80.2 (68.6, 91.7)        | 5.2 (1.3, 9.0)         |
| United Arab Emirates         | 17.9 (8.4, 27.4)         | 66.9 (51.9, 81.8)        | 15.2 (4.9, 25.6)        | 13.7 (10, 17.4)          | 77.4 (73.0, 81.8)        | 8.9 (7.0, 10.8)         | 20.0 (12.3, 27.6)        | 72.0 (65.3, 78.8)        | 8.0 (4.2, 11.8)        | 10.3 (3.6, 17.1)         | 79.1 (70.1, 88.1)        | 10.5 (3.6, 17.5)       |
| UNRWA                        | 31.3 (23.9, 38.6)        | 60.4 (52.9, 68.0)        | 8.3 (3.7, 12.9)         | 29.9 (27.5, 32.2)        | 62.5 (60.4, 64.7)        | 7.6 (6.5, 8.6)          | 30.4 (25.8, 35.0)        | 62.6 (58.1, 67.2)        | 7.0 (4.7, 9.2)         | 30.3 (24.0, 36.7)        | 58.9 (53.3, 64.4)        | 10.8 (6.6, 15.1)       |
| Yemen                        | 31.4 (14.8, 48.0)        | 53.8 (46.8, 60.9)        | 14.7 (2.0, 27.5)        | 35.6 (26.9, 44.4)        | 54.0 (46.2, 61.7)        | 10.4 (7.0, 13.8)        | 35.6 (24.8, 46.3)        | 55.7 (42.7, 68.8)        | 8.7 (1.8, 15.7)        | 32.3 (9.4, 55.3)         | 67.7 (44.7, 90.6)        | –                      |
| <b>Pooled estimates</b>      | <b>20.6 (14.4, 26.8)</b> | <b>66.0 (60.5, 71.6)</b> | <b>11.7 (8.6, 14.8)</b> | <b>20.7 (16.1, 25.3)</b> | <b>68.9 (63.6, 74.3)</b> | <b>10.0 (7.8, 12.3)</b> | <b>21.3 (17.3, 25.3)</b> | <b>68.6 (64.4, 72.8)</b> | <b>9.0 (7.0, 10.9)</b> | <b>20.2 (14.5, 26.0)</b> | <b>69.9 (64.5, 75.2)</b> | <b>8.0 (5.8, 10.2)</b> |
| <b>I<sup>2</sup> (%)</b>     | <b>92.2</b>              | <b>82.4</b>              | <b>83</b>               | <b>97.1</b>              | <b>97.1</b>              | <b>95.6</b>             | <b>83.2</b>              | <b>82.6</b>              | <b>70.1</b>            | <b>87.3</b>              | <b>76.3</b>              | <b>89</b>              |
| <b>Southeast Asia Region</b> |                          |                          |                         |                          |                          |                         |                          |                          |                        |                          |                          |                        |
| Bangladesh                   | 22.8 (7.7, 37.9)         | 76.8 (61.7, 91.8)        | 0.4 (0.0, 1.3)          | 12.5 (10.3, 14.6)        | 86.6 (84.3, 88.9)        | 0.9 (0.1, 1.8)          | 5.3 (2.4, 8.2)           | 94.4 (91.5, 97.4)        | 0.2 (0.0, 0.7)         | 13.6 (5.8, 21.4)         | 84.4 (76.2, 92.6)        | 2.0 (0.9, 3.1)         |
| India                        | 4.0 (1.5, 6.4)           | 94.5 (91.5, 97.5)        | 1.6 (0.0, 3.3)          | 4.4 (3.4, 5.4)           | 93.9 (92.6, 95.3)        | 1.6 (1.1, 2.2)          | 3.7 (1.6, 5.8)           | 95.3 (93, 97.7)          | 0.9 (0.1, 1.8)         | 4.2 (2.6, 5.7)           | 94.2 (91.5, 96.9)        | 1.7 (0.2, 3.1)         |
| Indonesia                    | 1.1 (0.3, 1.9)           | 97.2 (95.8, 98.6)        | 1.7 (0.4, 3.0)          | 2.5 (1.8, 3.1)           | 93.8 (92.6, 95.0)        | 3.7 (2.9, 4.5)          | 1.7 (0.8, 2.6)           | 96.1 (94.9, 97.3)        | 2.2 (1.0, 3.4)         | 2.3 (0.5, 4.2)           | 95.8 (93.9, 97.6)        | 1.9 (0.2, 3.6)         |
| Thailand                     | 2.4 (0.0, 5.8)           | 88.4 (81.1, 95.6)        | 9.2 (3.2, 15.2)         | 5.2 (4.0, 6.3)           | 91.3 (89.4, 93.2)        | 3.6 (2.5, 4.7)          | 7.1 (2.8, 11.3)          | 84.6 (78.5, 90.7)        | 8.3 (3.4, 13.1)        | 6.1 (1.1, 11.0)          | 89.6 (82.7, 96.5)        | 4.4 (1.0, 7.7)         |
| Timor-Leste                  | 16.0 (4.8, 27.2)         | 77.2 (65.4, 88.9)        | 4.4 (1.0, 7.7)          | 16.8 (13.2, 20.4)        | 77.6 (74.0, 81.2)        | 5.7 (4.4, 6.9)          | 19.0 (13.8, 24.2)        | 77.8 (72.0, 83.6)        | 3.2 (0.0, 6.7)         | 12.9 (0.0, 27.3)         | 72.6 (57.5, 87.7)        | 14.5 (7.5, 21.4)       |
| <b>Pooled</b>                | <b>4.1 (0.9, 8.3)</b>    | <b>90.5 (85.3, 95.7)</b> | <b>2.0 (0.5, 3.5)</b>   | <b>7.8 (4.7, 10.9)</b>   | <b>88.9 (85.0, 92.8)</b> | <b>3.0 (1.6, 4.4)</b>   | <b>6.7 (2.8, 10.6)</b>   | <b>90.6 (86.2, 95.0)</b> | <b>1.7 (0.4, 3.0)</b>  | <b>5.0 (2.4, 7.6)</b>    | <b>91.0 (86.7, 95.3)</b> | <b>2.9 (1.2, 4.6)</b>  |

| <b>estimates</b>              | <b>7.3)</b>      | <b>95.7)</b>       | <b>3.6)</b>       | <b>11.0)</b>     | <b>92.9)</b>       | <b>4.5)</b>        | <b>10.6)</b>     | <b>95.0)</b>       | <b>3.0)</b>       | <b>7.7)</b>      | <b>95.3)</b>       | <b>4.6)</b>       |
|-------------------------------|------------------|--------------------|-------------------|------------------|--------------------|--------------------|------------------|--------------------|-------------------|------------------|--------------------|-------------------|
| <b>I<sup>2</sup> (%)</b>      | <b>79.4</b>      | <b>83.4</b>        | <b>74.9</b>       | <b>97.0</b>      | <b>96</b>          | <b>93.5</b>        | <b>92.1</b>      | <b>91.7</b>        | <b>83.2</b>       | <b>64.8</b>      | <b>77.5</b>        | <b>72.2</b>       |
| <b>Western Pacific Region</b> |                  |                    |                   |                  |                    |                    |                  |                    |                   |                  |                    |                   |
| Brunei                        | 3.6 (0.0,        | 89.6 (82.9,        | 6.8 (1.2,         | 2.1 (1.3,        | 88.0 (86.2,        | 10.0 (8.4,         | 3.4 (1.1,        | 85.7 (80.8,        | 10.9 (6.5,        | 0.7 (0.0,        | 86.4 (78.6,        | 12.9 (5.3,        |
| Darussalam                    | 7.3)             | 96.2)              | 12.5)             | 2.9)             | 89.7)              | 11.6)              | 5.7)             | 90.6)              | 15.3)             | 2.2)             | 94.1)              | 20.5)             |
| Cambodia                      | 1.5 (0.0,        | 98.5 (95.3,        | –                 | 4.9 (3.4,        | 93.5 (91.9,        | 1.6 (0.8,          | 4.7 (0.4,        | 94.7 (90.1,        | 0.6 (0.0,         | 2.2 (0.0,        | 96.1 (91.1,        | 1.8 (0.2,         |
|                               | 4.7)             | 100.0)             |                   | 6.4)             | 95.2)              | 2.3)               | 9.1)             | 99.3)              | 1.4)              | 6.9)             | 100.0)             | 3.3)              |
| China                         | 3.6 (1, 6.2)     | 94.4 (91.5,        | 2.1 (0.5,         | 2.3 (1.8,        | 94.5 (93.8,        | 3.2 (2.5,          | 3.3 (1.4,        | 94.5 (92.2,        | 2.2 (1.4,         | 4.3 (0.2,        | 90.5 (86.3,        | 5.1 (2.3,         |
|                               |                  | 97.3)              | 3.6)              | 2.8)             | 95.2)              | 3.8)               | 5.2)             | 96.7)              | 3.0)              | 8.4)             | 94.8)              | 8.0)              |
| Cook                          | 7.5 (5.2,        | 85.5 (64.5,        | 7.0 (0.0,         | 12.3 (7.7,       | 77.7 (73.5,        | 10.0 (7.2,         | 18.4 (0.0,       | 73.7 (49.8,        | 7.8 (0.0,         | 9.9 (0.0,        | 81.0 (66.3,        | 9.1 (0.0,         |
|                               | 9.8)             | 100.0)             | 27.1)             | 16.9)            | 81.9)              | 12.8)              | 38.8)            | 97.7)              | 20.2)             | 20.9)            | 95.7)              | 25.7)             |
| Kiribati                      | 20.8 (9.3,       | 50.4 (36.1,        | 28.8 (15.0,       | 20.1 (16.0,      | 67.2 (62.3,        | 12.7 (10.1,        | 16.0 (6.2,       | 64.9 (54.0,        | 19.1 (9.7,        | 16.8 (9.2,       | 71.1 (56.8,        | 12.1 (3.8,        |
|                               | 32.3)            | 64.6)              | 42.6)             | 24.2)            | 72.0)              | 15.4)              | 25.8)            | 75.9)              | 28.5)             | 24.4)            | 85.4)              | 20.4)             |
| Laos                          | 1.0 (0.0,        | 99.0 (96.9,        | –                 | 1.9 (0.7,        | 94.1 (92.7,        | 4.0 (2.6,          | 3.8 (0.3,        | 95.6 (92.7,        | 0.6 (0.0,         | 2.3 (0.0,        | 94.4 (87.7,        | 3.3 (0.0,         |
|                               | 3.1)             | 100.0)             |                   | 3.1)             | 95.5)              | 5.4)               | 7.2)             | 98.6)              | 1.9)              | 5.8)             | 100.0)             | 8.0)              |
| Malaysia                      | 3.4 (1.9,        | 84.4 (81.6,        | 12.2 (9.7,        | 2.6 (2.1,        | 86.4 (85.2,        | 11.1 (10.0,        | 3.7 (2.3,        | 83.8 (81.5,        | 12.5 (10.2,       | 4.2 (2.5,        | 85.6 (82.7,        | 10.2 (7.8,        |
|                               | 5.0)             | 87.2)              | 14.6)             | 3.0)             | 87.6)              | 12.1)              | 5.0)             | 86.1)              | 14.8)             | 5.9)             | 88.5)              | 12.6)             |
| Mongolia                      | 6.5 (2.6,        | 76.9 (71.1,        | 16.6 (9.6,        | 5.5 (4.5,        | 84.1 (82.6,        | 10.4 (9.0,         | 4.6 (2.4,        | 83.5 (79.1,        | 11.9 (7.7,        | 5.8 (2.2,        | 86.2 (81.2,        | 8.0 (4.0,         |
|                               | 10.4)            | 82.7)              | 23.6)             | 6.5)             | 85.7)              | 11.7)              | 6.8)             | 87.9)              | 16.1)             | 9.3)             | 91.3)              | 11.9)             |
| Nauru                         | 26.1 (0.0,       | 30.9 (0.0,         | 43.0 (6.9,        | 11.7 (7.6,       | 55.4 (49.1,        | 32.8 (26.8,        | 13.0 (0.3,       | 51.2 (32.6,        | 35.8 (18,         | 15.8 (0.0,       | 26.3 (6.5,         | 57.9 (35.7,       |
|                               | 56.8)            | 62.6)              | 79.2)             | 15.9)            | 61.7)              | 38.8)              | 25.7)            | 69.9)              | 53.6)             | 32.2)            | 46.1)              | 80.1)             |
| Philippines                   | 3.9 (1.0,        | 87.3 (81.0,        | 8.8 (3.4,         | 3.6 (2.7,        | 87.6 (86.0,        | 8.8 (7.7,          | 4.0 (1.9,        | 85.8 (80.5,        | 10.2 (5.1,        | 1.9 (0.2,        | 91.5 (88.8,        | 6.6 (4.5,         |
|                               | 6.8)             | 93.6)              | 14.2)             | 4.5)             | 89.1)              | 10.0)              | 6.0)             | 91.2)              | 15.4)             | 3.6)             | 94.3)              | 8.6)              |
| Samoa                         | 22.6 (8.2,       | 59.3 (54.2,        | 18.0 (4.9,        | 15.7 (11.9,      | 58.4 (53.6,        | 25.9 (21.5,        | 16.0 (9.2,       | 62.1 (53.7,        | 21.9 (15.8,       | 15.1 (6.9,       | 66.4 (58.1,        | 18.6 (10.9,       |
|                               | 37.1)            | 64.5)              | 31.1)             | 19.5)            | 63.2)              | 30.4)              | 22.8)            | 70.4)              | 28.0)             | 23.3)            | 74.6)              | 26.2)             |
| Solomon                       | 26.8 (0.0,       | 63.8 (45.3,        | 9.4 (0.0,         | 23.7 (19.1,      | 57.6 (50.5,        | 18.7 (12.2,        | 22.7 (14.8,      | 51.3 (37.8,        | 26.0 (9.9,        | 8.4 (0.2,        | 71.2 (46.6,        | 20.4 (0.0,        |
|                               | 55.5)            | 82.3)              | 22.6)             | 28.4)            | 64.7)              | 25.1)              | 30.6)            | 64.7)              | 42.2)             | 16.6)            | 95.7)              | 44.7)             |
| Tonga                         | 10.9 (3.7,       | 66.3 (55.3,        | 22.8 (14.6,       | 9.0 (7.1,        | 68.6 (64.9,        | 22.4 (19.1,        | 7.2 (3.6,        | 70.2 (63.7,        | 22.6 (16.1,       | 12.5 (6.6,       | 66.3 (58.5,        | 21.2 (14.0,       |
|                               | 18.1)            | 77.3)              | 31.1)             | 10.9)            | 72.3)              | 25.7)              | 10.8)            | 76.7)              | 29.1)             | 18.3)            | 74.2)              | 28.4)             |
| Tuvalu                        | 28.3 (6.5,       | 57.0 (31.6,        | 14.7 (0.0,        | 7.9 (5.1,        | 55.6 (50.4,        | 36.5 (31.5,        | 2.1 (0.0,        | 59.7 (44.9,        | 38.2 (23.5,       | 10.7 (0,         | 56.2 (36.2,        | 33.1 (14.0,       |
|                               | 50.1)            | 82.4)              | 36.2)             | 10.8)            | 60.7)              | 41.5)              | 6.2)             | 74.5)              | 52.9)             | 22.9)            | 76.3)              | 52.2)             |
| Vanuatu                       | 19.5 (0.0,       | 61.8 (20.4,        | 18.7 (0.0,        | 18.7 (14.7,      | 61.3 (52.7,        | 20.1 (13.3,        | 15.7 (1.9,       | 61.9 (42.7,        | 22.4 (13.4,       | 17.5 (0.0,       | 59.5 (34.4,        | 23.0 (18.4,       |
|                               | 41.5)            | 100.0)             | 38.8)             | 22.6)            | 69.8)              | 26.9)              | 29.5)            | 81.2)              | 31.4)             | 44.7)            | 84.6)              | 27.7)             |
| Vietnam                       | 2.5 (1.7,        | 95.0 (93.5,        | 2.5 (1.8,         | 3.6 (2.5,        | 95.5 (94.3,        | 0.9 (0.5,          | 1.1 (0.0,        | 97.5 (95.6,        | 1.4 (1.1,         | 5.6 (2.5,        | 93.4 (88.1,        | 1.0 (0.0,         |
|                               | 3.4)             | 96.5)              | 3.2)              | 4.7)             | 96.6)              | 1.3)               | 2.9)             | 99.3)              | 1.7)              | 8.8)             | 98.7)              | 3.4)              |
| Wallis and<br>Futuna          | 13.3 (0.0,       | 69.4 (45.0,        | 17.3 (0.0,        | 8.9 (6.3,        | 75.4 (71.0,        | 15.7 (11.5,        | 12.0 (4.1,       | 65.6 (55.0,        | 22.4 (12.3,       | 9.2 (0.0,        | 74.6 (56.1,        | 16.2 (3.7,        |
|                               | 29.6)            | 93.9)              | 35.4)             | 11.5)            | 79.8)              | 19.9)              | 19.9)            | 76.2)              | 32.4)             | 20.1)            | 93.1)              | 28.7)             |
| <b>Pooled estimates</b>       | <b>4.9 (3.2,</b> | <b>80.0 (74.6,</b> | <b>11.3 (7.8,</b> | <b>7.9 (6.5,</b> | <b>77.3 (73.3,</b> | <b>13.6 (10.8,</b> | <b>5.7 (4.0,</b> | <b>78.1 (73.0,</b> | <b>10.0 (8.0,</b> | <b>5.7 (3.8,</b> | <b>80.4 (75.5,</b> | <b>11.5 (8.1,</b> |
|                               | <b>6.5)</b>      | <b>85.4)</b>       | <b>14.8)</b>      | <b>9.4)</b>      | <b>81.4)</b>       | <b>16.3)</b>       | <b>7.4)</b>      | <b>83.3)</b>       | <b>12.1)</b>      | <b>7.6)</b>      | <b>85.4)</b>       | <b>14.9)</b>      |

|                          |                  |                    |                  |                  |                    |                  |                  |                    |                  |                  |                    |                  |
|--------------------------|------------------|--------------------|------------------|------------------|--------------------|------------------|------------------|--------------------|------------------|------------------|--------------------|------------------|
| <b>I<sup>2</sup> (%)</b> | <b>74.9</b>      | <b>96.1</b>        | <b>89.1</b>      | <b>95.9</b>      | <b>98.7</b>        | <b>98.7</b>      | <b>77.3</b>      | <b>95.2</b>        | <b>95.2</b>      | <b>76.3</b>      | <b>89.3</b>        | <b>91.6</b>      |
| <b>Total</b>             |                  |                    |                  |                  |                    |                  |                  |                    |                  |                  |                    |                  |
| <b>Pooled</b>            | <b>7.3 (4.2,</b> | <b>80.1 (72.4,</b> | <b>9.4 (4.3,</b> | <b>8.3 (5.1,</b> | <b>81.9 (75.7,</b> | <b>9.1 (5.5,</b> | <b>7.8 (4.1,</b> | <b>82.4 (74.9,</b> | <b>7.7 (3.8,</b> | <b>6.2 (3.2,</b> | <b>82.7 (76.4,</b> | <b>8.5 (5.1,</b> |
| <b>estimates</b>         | <b>10.4)</b>     | <b>87.9)</b>       | <b>14.4)</b>     | <b>11.4)</b>     | <b>88.2)</b>       | <b>12.6)</b>     | <b>11.4)</b>     | <b>89.9)</b>       | <b>11.6)</b>     | <b>9.3)</b>      | <b>88.9)</b>       | <b>11.9)</b>     |
| <b>I<sup>2</sup> (%)</b> | <b>88.0</b>      | <b>90.8</b>        | <b>93.1</b>      | <b>93.3</b>      | <b>95.3</b>        | <b>93.2</b>      | <b>93.1</b>      | <b>95.1</b>        | <b>93.5</b>      | <b>89.9</b>      | <b>88.9</b>        | <b>86.3</b>      |
